# Supplementary material
Source: PubMed Central journal article supplement (PMC2527693)
Supplement: NIHMS60183-supplement-SI.pdf [file NIHMS60183-supplement-SI.pdf]

## Supporting Material for the manuscript

### “Transition State of *N. meningitidis* 5'-Methylthioadenosine Nucleosidase”

*Vipender Singh, Minkui Luo, Rosemary L. Brown, Gillina E. Norris, and Vern L. Schramm*  
*Department of Biochemistry, Albert Einstein College of Medicine, 1300 Morris Park Avenue,*  
*Bronx, New York 10461 and Institute of Molecular Biosciences, Massey University, Private Bag*  
*11222, Palmerston North, New Zealand.*

#### Complete list of authors for Ref. 19

19. M. J. Frisch, G. W.; Trucks, H. B.; Schlegel, G. E.; Scuseria, M. A.; Robb, J. R.;  
Cheeseman, V. G.; Zakrzewski, J. A.; Montgomery, Jr. R. E.; Stratmann, J. C.; Burant, S.;  
Dapprich, J. M.; Millam, A. D.; Daniels, K. N.; Kudin, M. C.; Strain, O.; Farkas, J.; Tomasi, V.;  
Barone, M.; Cossi, R.; Cammi, B.; Mennucci, C.; Pomelli, C.; Adamo, S.; Clifford, J.;  
Ochterski, G. A.; Petersson, P. Y.; Ayala, Q.; Cui, K.; Morokuma, N.; Rega, P.; Salvador, J. J.;  
Dannenberg, D. K.; Malick, A. D.; Rabuck, K.; Raghavachari, J. B.; Foresman, J.; Cioslowski, J.  
V.; Ortiz, A. G.; Baboul, B. B.; Stefanov, G.; Liu, A.; Liashenko, P.; Piskorz, I.; Komaromi, R.;  
Gomperts, R. L.; Martin, D. J.; Fox, T.; Keith, M. A.; Al-Laham, C. Y.; Peng, A.; Nanayakkara,  
M.; Challacombe, P. M. W.; Gill, B.; Johnson, W.; Chen, M. W.; Wong, J. L.; Andres, C.;  
Gonzalez, M.; Head-Gordon, E. S.; Replogle, J. A.; Pople, Gaussian 98 (Gaussian, Inc.,  
Pittsburgh, PA, 1998)

## Determination of forward commitment factor for *N. meningitides* MTAN

The forward commitment factor for *N. meningitides* MTAN was determined by the isotope trapping method under rapid-mixing pre-steady state conditions.<sup>10,18</sup> Briefly, 25.1  $\mu\text{L}$  stock solution of 30  $\mu\text{M}$  *N. meningitides* MTAN was pre-mixed with 20.9  $\mu\text{L}$  of 250  $\mu\text{M}$  1-<sup>14</sup>C-MTA (total 100,000 cpm) for 2 ms using a quench flow apparatus (PQF-3, KinTek). Following this equilibration with limited catalytic turnover, a chase solution containing 3 mM MTA in reaction buffer was added rapidly through the third syringe to the final volume of 1 mL. Subsequently, 100  $\mu\text{L}$  aliquots were collected every 15 s for 2.5 min and quenched with 50  $\mu\text{L}$  of 1 N HCl, followed by neutralization with 50  $\mu\text{L}$  of 1 N KOH. The labeled ribose product was purified by acid-washed charcoal-sepharose column and quantified using scintillation counter as described below for KIE determination. The amount of 1-<sup>14</sup>C methylthioribose formed after the chase step was corrected for the background as well as for the 1-<sup>14</sup>C methylthioribose generated during 2 ms pre-mixing period. The former was determined through control experiments in the absence of enzyme. The latter was estimated on the basis of known  $k_{\text{cat}}$  values and enzyme concentrations. The amount of MTAN-bound radiolabeled substrate prior to the chase step was calculated on the basis of the concentrations of MTAN and MTA. Substrate (MTA) concentration was approximately 200-fold larger than  $K_m$ . The ratio of the amount of radiolabeled product formed divided by the radiolabeled substrate bound to MTAN in the preequilibration step (2 msec) was plotted as a function of time (Figure S1). The forward commitment factor  $C_f$  was obtained on the basis of y-axis intercept upon extrapolating the ratio to zero time ( $C_f = (\text{intercept}/(1-\text{intercept}))$ ). The  $C_f$  of 0.66 was measured as shown in the figure S1 below.

Figure S1

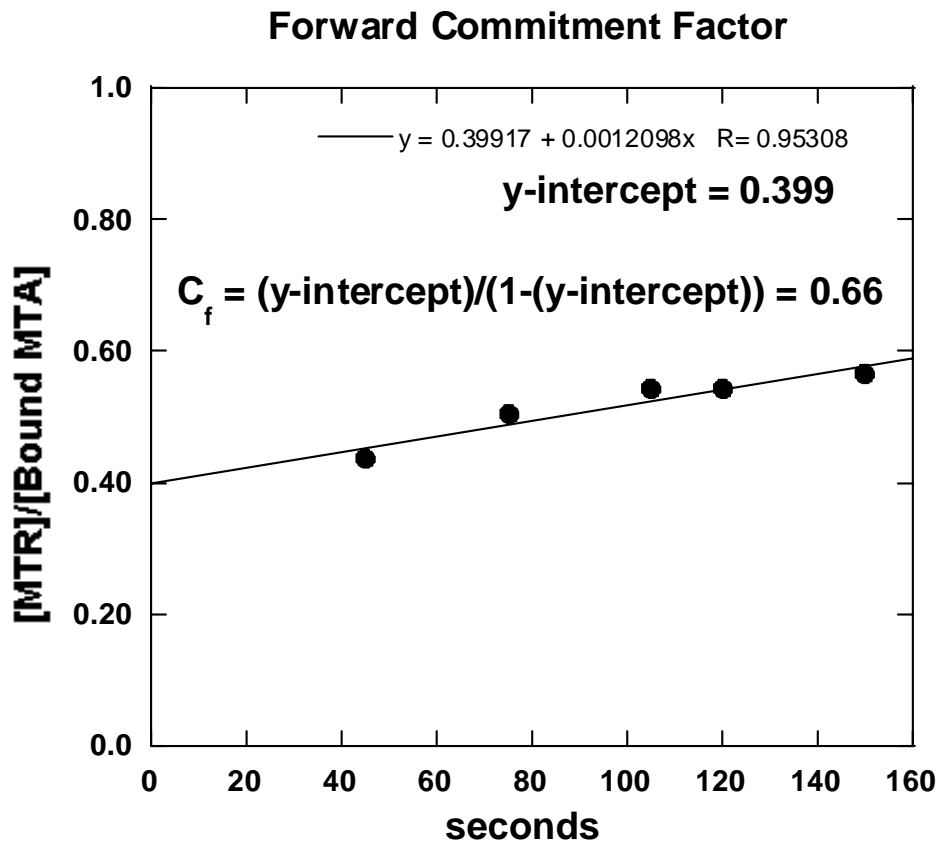

### **Assay for measuring kinetic isotope effect for *N. meningitidis* MTAN**

Competitive kinetic isotope effects (KIEs) for isotopic substitutions at various positions on the MTA substrate were measured by comparing the relative rate of product formation from pairs of isotopically labeled substrates. Reactions for KIEs measurement contained a mixture of  $^3\text{H}$  and  $^{14}\text{C}$  labeled substrates with  $^3\text{H}:^{14}\text{C}$  in 4:1 ratio to facilitate easy deconvolution of the  $\beta$  emission spectra. The MTAN assay for KIE measurement was performed in triplicates of 1 mL reactions containing 100 mM HEPES buffer pH 7.5, 50 mM KCl, 250  $\mu\text{M}$  MTA (including labeled substrates), and 1 - 5 nM *N. meningitidis* MTAN. After 20-30% completion of the reaction, 750  $\mu\text{L}$  of 1 mL was resolved on charcoal-sepharose (acid-washed powdered charcoal and sepharose in 1:4 ratio made into a slurry in 1 mM MTR and settled in Pasteur pipettes). The remainder of the reaction mixture was allowed to react to completion and then applied to the column. Columns were washed with 2 volumes of 1 mM MTR and radioactive methylthioribose was eluted with 6 volumes of 15 mM MTR containing 50% ethanol. The eluate was mixed with scintillation fluid and counted for at least 3 cycles at 10 minutes per cycle. The  $^3\text{H}$  to  $^{14}\text{C}$  ratio was determined for partial and complete reactions and the KIEs were corrected to 0% hydrolysis

by the equation

$$KIE = \frac{\ln(1-f)}{\ln\left[(1-f)\frac{R_f}{R_o}\right]}$$

Where  $f$  is the fraction of reaction progress and  $R_f$  and  $R_o$  are ratios of heavy to light isotope at partial and total completion of reaction, respectively.

## Geometry of 5'-methylthioadenosine used in KIE calculations

### Internal Coordinates

C,0,-0.0120893037,-0.0773276416,-0.0401282096  
C,0,-0.0711255381,-0.0707941909,1.4944858241  
O,0,1.2647507091,-0.1856944792,1.9598971401  
C,0,2.1909774574,-0.1026929086,0.8575556703  
C,0,1.3809430601,0.5138442349,-0.2978032309  
N,0,-0.6364152082,1.179030849,2.0312859856  
C,0,-1.8876233081,1.7094796589,1.7686770698  
C,0,-2.0068608936,2.8018997953,2.6346250747  
N,0,-0.884361983,2.940425613,3.4301898742  
C,0,-0.1064961641,1.9544513191,3.050662074  
C,0,-3.2137206244,3.5277035665,2.5520492367  
N,0,-4.1564013698,3.1274778023,1.680167837  
C,0,-3.8990155655,2.0549824964,0.9139428718  
N,0,-2.8038734283,1.2890275129,0.8844722328  
N,0,-3.446965192,4.6289072002,3.3089700185  
C,0,3.4099052243,0.695851633,1.3038358685  
S,0,4.6741724119,0.8745458897,-0.0206438194  
C,0,5.488171398,-0.7634766332,0.0464051017  
O,0,1.8156806223,0.1290278578,-1.5862584491  
O,0,-0.0418360584,-1.4321243756,-0.4513367871  
H,0,-4.6934921433,1.7734593574,0.2261496515  
H,0,0.8641111155,1.7259195427,3.4628336329  
H,0,-0.661728868,-0.9163699376,1.8598181908  
H,0,-0.8278612257,0.5013125947,-0.4850872697  
H,0,1.3487536434,1.6088611284,-0.1926488685  
H,0,2.4809031173,-1.1195651908,0.5646970599  
H,0,0.4373478974,-1.4600109216,-1.2945335643  
H,0,3.1127676265,1.7157221544,1.5671182315  
H,0,3.87517147,0.2458581737,2.1857391275  
H,0,6.2869560644,-0.7433271799,-0.697691209  
H,0,5.9274943541,-0.9309179618,1.0325388691  
H,0,4.7983979348,-1.5735169375,-0.1976759379  
H,0,2.7491252556,0.388599165,-1.6617896186  
H,0,-2.8259187014,4.8337414995,4.0751037327  
H,0,-4.3821482205,5.0039872052,3.3167665043

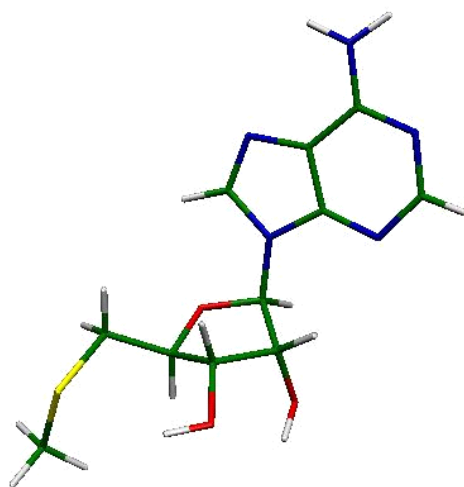

## Geometry of the *Neisseria meningitidis* MTAN's transition state

### Internal Coordinates

C,0,-0.0120893037,-0.0773276416,-0.0401282096  
C,0,-0.0711255381,-0.0707941909,1.4944858241  
O,0,1.2647507091,-0.1856944792,1.9598971401  
C,0,2.1909774574,-0.1026929086,0.8575556703  
C,0,1.3809430601,0.5138442349,-0.2978032309  
N,0,-0.6364152082,1.179030849,2.0312859856  
C,0,-1.8876233081,1.7094796589,1.7686770698  
C,0,-2.0068608936,2.8018997953,2.6346250747  
N,0,-0.884361983,2.940425613,3.4301898742  
C,0,-0.1064961641,1.9544513191,3.050662074  
N,0,-2.2389757474,1.9976604641,0.3622824506  
N,0,-3.9907641683,4.3695800541,3.3289887973  
C,0,2.9123705343,1.5894945931,1.4626291148  
S,0,4.0387590659,2.3084761823,0.1967439337  
C,0,5.4835416613,1.170665209,0.291530358  
O,0,1.6807413319,0.6074382463,-1.5471329595  
O,0,0.3663670243,-1.4198504411,-0.42305796  
H,0,-3.7630978475,2.8128119235,-0.7672223394  
H,0,0.425156094,1.496426956,3.9426596868  
H,0,-0.7425872451,-0.7998978138,1.995832064  
H,0,-1.0107943428,0.0986114354,-0.4665424087  
H,0,0.8171222313,1.8915937448,-0.1539642076  
H,0,2.7703558152,-0.339700839,0.513348091  
H,0,0.8696520207,-1.2923046912,-1.2425141677  
H,0,2.2547804417,2.4050505955,1.7774495324  
H,0,3.5016861404,1.2840554768,2.331781807  
H,0,5.6459060463,0.6811947162,-0.6700103263  
H,0,6.3719635211,1.7431912421,0.5629695871  
H,0,5.3066813932,0.4074357271,1.0514767695  
H,0,2.4838049068,1.1475618428,-1.6168321872  
H,0,-3.948486787,4.0782023606,4.2954777597  
H,0,-4.9120446315,4.669884087,3.0374494726  
H,0,-1.8245922624,2.6223814416,4.7152489348

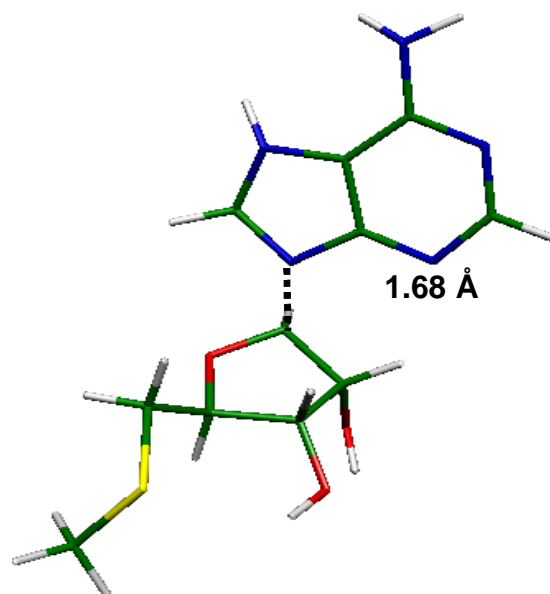

## Normal Modes corresponding to the transition state of *Neisseria meningitides*

### MTAN

\*\*\*\*\* 1 imaginary frequencies (negative Signs) \*\*\*\*\*

Diagonal vibrational polarizability:

187.2399712      195.5430810      56.7988192

Harmonic frequencies (cm<sup>-1</sup>), IR intensities (KM/Mole), Raman scattering activities (A<sup>4</sup>/AMU), depolarization ratios for plane and unpolarized incident light, reduced masses (AMU), force constants (mDyne/A), and normal coordinates:

|             |    | 1         |       |       | 2       |       |       | 3       |       |       |
|-------------|----|-----------|-------|-------|---------|-------|-------|---------|-------|-------|
|             |    | A         |       |       | A       |       |       | A       |       |       |
| Frequencies | -- | -169.2830 |       |       | 14.7936 |       |       | 26.9563 |       |       |
| Red. masses | -- | 1.0314    |       |       | 6.5788  |       |       | 5.4645  |       |       |
| Frc consts  | -- | 0.0174    |       |       | 0.0008  |       |       | 0.0023  |       |       |
| IR Inten    | -- | 0.2473    |       |       | 0.5923  |       |       | 2.8930  |       |       |
| Atom        | AN | X         | Y     | Z     | X       | Y     | Z     | X       | Y     | Z     |
| 1           | 6  | 0.00      | 0.00  | 0.00  | 0.01    | 0.04  | 0.10  | 0.01    | -0.06 | 0.02  |
| 2           | 6  | 0.00      | 0.00  | 0.00  | -0.02   | 0.02  | 0.09  | 0.00    | -0.09 | 0.00  |
| 3           | 8  | 0.00      | 0.00  | 0.00  | -0.03   | 0.02  | 0.05  | -0.01   | -0.09 | -0.03 |
| 4           | 6  | 0.00      | 0.01  | 0.00  | 0.02    | 0.02  | 0.02  | -0.02   | -0.03 | -0.02 |
| 5           | 6  | 0.00      | 0.00  | 0.00  | 0.03    | 0.06  | 0.06  | 0.00    | -0.03 | 0.00  |
| 6           | 7  | 0.00      | 0.00  | 0.00  | -0.01   | 0.02  | 0.11  | 0.01    | -0.09 | -0.02 |
| 7           | 6  | 0.00      | 0.00  | 0.00  | -0.06   | -0.02 | 0.01  | -0.01   | -0.07 | -0.04 |
| 8           | 6  | 0.00      | 0.00  | 0.00  | -0.04   | 0.00  | 0.03  | 0.07    | 0.03  | 0.04  |
| 9           | 7  | 0.00      | 0.00  | 0.00  | 0.02    | 0.06  | 0.12  | 0.14    | 0.06  | 0.11  |
| 10          | 6  | 0.00      | 0.00  | 0.00  | 0.05    | 0.08  | 0.16  | 0.10    | -0.01 | 0.06  |
| 11          | 6  | 0.00      | 0.00  | 0.00  | -0.09   | -0.04 | -0.06 | 0.07    | 0.08  | 0.05  |
| 12          | 7  | 0.00      | 0.00  | 0.00  | -0.15   | -0.11 | -0.15 | -0.02   | 0.02  | -0.04 |
| 13          | 6  | 0.00      | 0.00  | 0.00  | -0.17   | -0.13 | -0.16 | -0.09   | -0.08 | -0.13 |
| 14          | 7  | 0.00      | 0.00  | 0.00  | -0.13   | -0.09 | -0.08 | -0.09   | -0.13 | -0.13 |
| 15          | 7  | 0.00      | 0.00  | 0.00  | -0.07   | -0.03 | -0.06 | 0.15    | 0.18  | 0.15  |
| 16          | 6  | 0.00      | 0.01  | 0.00  | 0.08    | 0.03  | -0.02 | -0.07   | -0.01 | -0.05 |
| 17          | 16 | 0.00      | -0.02 | 0.00  | 0.16    | 0.02  | -0.09 | -0.11   | 0.06  | -0.03 |
| 18          | 6  | 0.00      | 0.02  | 0.00  | 0.11    | -0.11 | -0.18 | -0.08   | 0.20  | 0.02  |
| 19          | 8  | 0.00      | 0.00  | 0.00  | 0.04    | 0.07  | 0.06  | 0.02    | 0.01  | 0.01  |
| 20          | 8  | 0.00      | 0.00  | 0.00  | -0.01   | 0.03  | 0.10  | 0.02    | -0.06 | 0.04  |
| 21          | 1  | 0.00      | 0.00  | 0.00  | -0.22   | -0.18 | -0.24 | -0.16   | -0.13 | -0.20 |
| 22          | 1  | 0.00      | 0.00  | 0.00  | 0.07    | 0.09  | 0.24  | 0.15    | -0.05 | 0.10  |
| 23          | 1  | 0.00      | 0.00  | 0.00  | -0.03   | 0.00  | 0.11  | 0.00    | -0.12 | 0.00  |
| 24          | 1  | 0.00      | 0.00  | 0.00  | 0.02    | 0.05  | 0.13  | 0.02    | -0.06 | 0.03  |
| 25          | 1  | 0.00      | 0.00  | 0.00  | 0.05    | 0.09  | 0.05  | 0.00    | -0.02 | -0.01 |
| 26          | 1  | 0.00      | 0.01  | 0.00  | -0.01   | -0.01 | -0.01 | 0.00    | -0.01 | -0.01 |
| 27          | 1  | 0.00      | 0.01  | 0.00  | 0.00    | 0.03  | 0.09  | 0.03    | -0.04 | 0.04  |
| 28          | 1  | 0.00      | 0.01  | 0.00  | 0.12    | 0.06  | 0.02  | -0.09   | -0.03 | -0.09 |
| 29          | 1  | 0.00      | 0.01  | 0.01  | 0.05    | 0.00  | -0.05 | -0.07   | -0.02 | -0.06 |
| 30          | 1  | 0.20      | 0.30  | 0.44  | 0.08    | -0.13 | -0.18 | -0.02   | 0.24  | 0.03  |
| 31          | 1  | -0.21     | 0.28  | -0.46 | 0.18    | -0.13 | -0.25 | -0.16   | 0.24  | 0.05  |
| 32          | 1  | 0.00      | -0.58 | 0.01  | 0.05    | -0.15 | -0.17 | -0.05   | 0.20  | 0.02  |
| 33          | 1  | 0.02      | 0.00  | -0.02 | 0.07    | 0.08  | 0.02  | 0.01    | 0.03  | -0.01 |
| 34          | 1  | 0.00      | 0.00  | 0.00  | -0.01   | 0.05  | -0.02 | 0.19    | 0.28  | 0.20  |
| 35          | 1  | 0.00      | 0.00  | 0.00  | -0.10   | -0.05 | -0.14 | 0.12    | 0.23  | 0.12  |

|             |    |          |       |       |          |       |       |       |          |       |
|-------------|----|----------|-------|-------|----------|-------|-------|-------|----------|-------|
| 36          | 1  | 0.00     | 0.00  | 0.00  | 0.06     | 0.10  | 0.12  | 0.18  | 0.14     | 0.15  |
|             |    |          | 4     |       |          | 5     |       |       | 6        |       |
|             |    |          | A     |       |          | A     |       |       | A        |       |
| Frequencies | -- | 45.2048  |       |       | 70.0259  |       |       |       | 78.5098  |       |
| Red. masses | -- | 3.7010   |       |       | 5.1020   |       |       |       | 3.5200   |       |
| Frc consts  | -- | 0.0045   |       |       | 0.0147   |       |       |       | 0.0128   |       |
| IR Inten    | -- | 1.2136   |       |       | 1.5602   |       |       |       | 2.4846   |       |
| Atom AN     |    | X        | Y     | Z     | X        | Y     | Z     | X     | Y        | Z     |
| 1           | 6  | -0.01    | -0.03 | 0.01  | 0.02     | 0.00  | 0.03  | -0.03 | 0.04     | 0.01  |
| 2           | 6  | -0.01    | 0.00  | 0.04  | -0.01    | -0.02 | 0.03  | -0.01 | 0.01     | -0.03 |
| 3           | 8  | 0.00     | -0.02 | 0.03  | -0.02    | -0.06 | -0.07 | -0.01 | 0.00     | -0.03 |
| 4           | 6  | 0.02     | -0.04 | 0.01  | 0.05     | -0.03 | -0.12 | 0.03  | -0.04    | -0.06 |
| 5           | 6  | 0.05     | -0.07 | 0.00  | 0.11     | 0.00  | -0.06 | -0.03 | 0.06     | -0.02 |
| 6           | 7  | 0.01     | 0.03  | 0.06  | 0.04     | 0.06  | 0.11  | -0.04 | 0.01     | -0.04 |
| 7           | 6  | -0.01    | 0.03  | 0.04  | 0.02     | 0.05  | 0.08  | -0.03 | -0.01    | -0.03 |
| 8           | 6  | -0.01    | 0.02  | 0.00  | 0.01     | 0.03  | 0.05  | -0.04 | -0.02    | -0.01 |
| 9           | 7  | 0.00     | 0.01  | 0.00  | 0.03     | 0.04  | 0.08  | -0.06 | -0.01    | -0.02 |
| 10          | 6  | 0.02     | 0.02  | 0.04  | 0.05     | 0.06  | 0.12  | -0.07 | 0.00     | -0.04 |
| 11          | 6  | -0.04    | 0.01  | -0.05 | -0.03    | -0.01 | -0.03 | -0.02 | -0.02    | 0.03  |
| 12          | 7  | -0.05    | 0.02  | -0.03 | -0.04    | -0.01 | -0.03 | 0.00  | -0.03    | 0.02  |
| 13          | 6  | -0.03    | 0.04  | 0.03  | -0.02    | 0.02  | 0.03  | 0.00  | -0.03    | -0.02 |
| 14          | 7  | -0.01    | 0.05  | 0.06  | 0.01     | 0.05  | 0.08  | -0.01 | -0.02    | -0.04 |
| 15          | 7  | -0.05    | -0.02 | -0.11 | -0.07    | -0.06 | -0.11 | -0.01 | -0.01    | 0.09  |
| 16          | 6  | -0.01    | -0.05 | 0.05  | 0.05     | -0.01 | -0.18 | 0.18  | -0.04    | -0.13 |
| 17          | 16 | 0.05     | -0.06 | 0.01  | -0.13    | 0.05  | -0.03 | 0.05  | -0.06    | -0.02 |
| 18          | 6  | 0.02     | 0.33  | -0.06 | -0.01    | -0.10 | 0.21  | 0.16  | 0.14     | 0.19  |
| 19          | 8  | 0.06     | -0.12 | -0.07 | 0.16     | 0.00  | -0.12 | -0.09 | 0.07     | 0.06  |
| 20          | 8  | -0.07    | -0.05 | -0.03 | -0.07    | -0.06 | 0.00  | -0.03 | 0.00     | 0.05  |
| 21          | 1  | -0.04    | 0.06  | 0.04  | -0.02    | 0.02  | 0.03  | 0.01  | -0.04    | -0.03 |
| 22          | 1  | 0.02     | 0.02  | 0.05  | 0.05     | 0.07  | 0.13  | -0.08 | 0.01     | -0.05 |
| 23          | 1  | -0.04    | 0.02  | 0.05  | -0.11    | -0.01 | 0.09  | -0.01 | -0.01    | -0.02 |
| 24          | 1  | -0.02    | -0.01 | 0.03  | 0.03     | 0.05  | 0.11  | -0.05 | 0.06     | 0.02  |
| 25          | 1  | 0.09     | -0.09 | 0.06  | 0.18     | 0.03  | -0.02 | -0.03 | 0.13     | -0.07 |
| 26          | 1  | 0.02     | -0.01 | -0.02 | 0.04     | -0.03 | -0.16 | -0.02 | -0.14    | -0.06 |
| 27          | 1  | -0.04    | -0.05 | -0.07 | -0.03    | -0.07 | -0.05 | -0.07 | 0.00     | 0.08  |
| 28          | 1  | -0.01    | -0.09 | 0.10  | 0.02     | 0.04  | -0.31 | 0.19  | 0.11     | -0.25 |
| 29          | 1  | -0.06    | -0.01 | 0.06  | 0.16     | -0.06 | -0.17 | 0.33  | -0.14    | -0.14 |
| 30          | 1  | 0.18     | 0.39  | -0.22 | -0.09    | -0.10 | 0.37  | 0.20  | 0.17     | 0.20  |
| 31          | 1  | -0.12    | 0.39  | 0.05  | 0.00     | -0.10 | 0.22  | 0.04  | 0.17     | 0.33  |
| 32          | 1  | -0.02    | 0.47  | -0.06 | 0.16     | -0.18 | 0.19  | 0.30  | 0.21     | 0.17  |
| 33          | 1  | 0.13     | -0.15 | -0.11 | 0.10     | 0.01  | -0.05 | -0.04 | 0.07     | 0.00  |
| 34          | 1  | -0.03    | -0.05 | -0.13 | -0.04    | -0.10 | -0.14 | -0.03 | 0.03     | 0.12  |
| 35          | 1  | -0.06    | -0.03 | -0.13 | -0.07    | -0.10 | -0.16 | 0.00  | -0.01    | 0.11  |
| 36          | 1  | 0.01     | 0.00  | -0.02 | 0.05     | 0.06  | 0.07  | -0.08 | -0.03    | -0.02 |
|             |    |          | 7     |       |          | 8     |       |       | 9        |       |
|             |    |          | A     |       |          | A     |       |       | A        |       |
| Frequencies | -- | 102.7667 |       |       | 130.8691 |       |       |       | 154.8485 |       |
| Red. masses | -- | 5.8581   |       |       | 4.9391   |       |       |       | 6.9699   |       |
| Frc consts  | -- | 0.0365   |       |       | 0.0498   |       |       |       | 0.0985   |       |
| IR Inten    | -- | 0.4806   |       |       | 5.5837   |       |       |       | 9.0936   |       |
| Atom AN     |    | X        | Y     | Z     | X        | Y     | Z     | X     | Y        | Z     |
| 1           | 6  | -0.10    | -0.01 | -0.04 | -0.06    | 0.03  | 0.07  | 0.00  | -0.08    | -0.12 |
| 2           | 6  | 0.01     | 0.01  | -0.06 | 0.03     | 0.05  | 0.03  | 0.02  | 0.00     | -0.03 |
| 3           | 8  | 0.06     | -0.08 | -0.04 | 0.08     | -0.05 | 0.03  | 0.03  | 0.01     | 0.07  |
| 4           | 6  | -0.03    | -0.07 | 0.03  | 0.06     | -0.03 | 0.05  | 0.03  | -0.10    | 0.08  |
| 5           | 6  | -0.15    | 0.00  | 0.01  | 0.05     | -0.04 | 0.03  | -0.05 | -0.13    | 0.00  |
| 6           | 7  | 0.07     | 0.08  | -0.01 | 0.04     | 0.14  | 0.02  | -0.03 | -0.05    | 0.02  |



|    |    |       |       |       |       |       |       |       |       |       |
|----|----|-------|-------|-------|-------|-------|-------|-------|-------|-------|
| 7  | 6  | 0.10  | 0.07  | 0.02  | 0.02  | 0.07  | -0.04 | -0.04 | -0.04 | 0.01  |
| 8  | 6  | 0.09  | 0.07  | 0.08  | -0.05 | -0.02 | -0.09 | -0.03 | -0.02 | 0.02  |
| 9  | 7  | 0.08  | 0.11  | 0.13  | -0.11 | 0.00  | -0.12 | -0.01 | -0.03 | 0.03  |
| 10 | 6  | 0.07  | 0.14  | 0.07  | -0.04 | 0.06  | -0.05 | -0.01 | -0.03 | 0.03  |
| 11 | 6  | 0.05  | -0.06 | -0.01 | 0.00  | -0.03 | 0.00  | -0.03 | 0.02  | 0.01  |
| 12 | 7  | 0.09  | -0.08 | -0.03 | 0.03  | -0.09 | -0.07 | -0.05 | 0.05  | 0.05  |
| 13 | 6  | 0.14  | -0.02 | -0.02 | 0.05  | -0.06 | -0.11 | -0.07 | 0.02  | 0.06  |
| 14 | 7  | 0.13  | 0.04  | -0.02 | 0.07  | 0.05  | -0.06 | -0.07 | -0.03 | 0.03  |
| 15 | 7  | -0.03 | -0.16 | -0.08 | 0.03  | 0.00  | 0.19  | -0.02 | 0.04  | -0.04 |
| 16 | 6  | -0.03 | -0.05 | -0.04 | -0.01 | -0.01 | 0.03  | 0.09  | -0.07 | -0.02 |
| 17 | 16 | -0.03 | 0.02  | -0.05 | 0.00  | 0.11  | 0.01  | 0.08  | 0.29  | -0.03 |
| 18 | 6  | -0.05 | 0.05  | -0.08 | -0.02 | -0.02 | -0.02 | 0.14  | 0.00  | 0.09  |
| 19 | 8  | -0.26 | -0.01 | 0.14  | 0.05  | -0.12 | -0.05 | -0.12 | -0.20 | 0.03  |
| 20 | 8  | -0.06 | -0.04 | 0.05  | -0.21 | -0.11 | 0.08  | 0.04  | 0.03  | -0.21 |
| 21 | 1  | 0.18  | -0.04 | -0.03 | 0.07  | -0.12 | -0.18 | -0.08 | 0.05  | 0.08  |
| 22 | 1  | 0.07  | 0.16  | 0.11  | -0.10 | 0.11  | -0.07 | 0.00  | -0.04 | 0.06  |
| 23 | 1  | -0.03 | 0.07  | -0.06 | 0.01  | 0.06  | 0.04  | 0.04  | 0.08  | -0.08 |
| 24 | 1  | -0.14 | 0.02  | -0.09 | -0.12 | 0.16  | 0.11  | 0.01  | -0.15 | -0.19 |
| 25 | 1  | -0.20 | 0.05  | -0.07 | 0.13  | -0.03 | 0.09  | -0.10 | -0.16 | -0.01 |
| 26 | 1  | -0.02 | -0.11 | 0.12  | 0.08  | 0.00  | 0.06  | 0.01  | -0.16 | 0.08  |
| 27 | 1  | -0.14 | -0.05 | 0.11  | -0.20 | -0.15 | 0.05  | -0.05 | -0.15 | -0.20 |
| 28 | 1  | -0.03 | -0.03 | -0.07 | -0.03 | -0.06 | 0.03  | 0.09  | -0.02 | -0.07 |
| 29 | 1  | -0.03 | -0.09 | -0.07 | -0.06 | -0.01 | 0.01  | 0.05  | -0.18 | -0.13 |
| 30 | 1  | -0.02 | 0.07  | -0.08 | -0.04 | -0.02 | 0.03  | 0.06  | 0.02  | 0.30  |
| 31 | 1  | -0.06 | 0.07  | -0.09 | 0.03  | -0.03 | -0.10 | 0.18  | 0.02  | -0.05 |
| 32 | 1  | -0.07 | 0.04  | -0.07 | -0.04 | -0.10 | -0.02 | 0.22  | -0.20 | 0.08  |
| 33 | 1  | -0.23 | -0.02 | 0.11  | 0.05  | -0.18 | 0.02  | -0.17 | -0.26 | 0.16  |
| 34 | 1  | -0.06 | -0.25 | -0.13 | 0.07  | 0.30  | 0.37  | -0.04 | -0.07 | -0.10 |
| 35 | 1  | -0.01 | -0.26 | -0.11 | 0.02  | 0.00  | 0.15  | -0.02 | 0.06  | -0.01 |
| 36 | 1  | 0.09  | 0.23  | 0.23  | -0.17 | -0.24 | -0.27 | 0.02  | 0.04  | 0.06  |

|             |    | 10       |       |       | 11       |       |       | 12       |       |       |
|-------------|----|----------|-------|-------|----------|-------|-------|----------|-------|-------|
|             |    | A        |       |       | A        |       |       | A        |       |       |
| Frequencies | -- | 165.4978 |       |       | 195.4004 |       |       | 219.6601 |       |       |
| Red. masses | -- | 4.7273   |       |       | 4.7855   |       |       | 4.8143   |       |       |
| Frc consts  | -- | 0.0763   |       |       | 0.1077   |       |       | 0.1369   |       |       |
| IR Inten    | -- | 1.7107   |       |       | 32.8845  |       |       | 3.9295   |       |       |
| Atom        | AN | X        | Y     | Z     | X        | Y     | Z     | X        | Y     | Z     |
| 1           | 6  | 0.09     | -0.07 | -0.07 | -0.08    | 0.04  | 0.03  | -0.03    | 0.04  | -0.03 |
| 2           | 6  | 0.09     | -0.04 | -0.04 | -0.16    | 0.07  | 0.11  | 0.02     | 0.05  | -0.02 |
| 3           | 8  | 0.06     | -0.08 | -0.05 | -0.12    | 0.06  | 0.04  | 0.02     | 0.05  | -0.03 |
| 4           | 6  | 0.03     | -0.06 | -0.01 | -0.08    | 0.02  | -0.01 | 0.01     | 0.04  | -0.03 |
| 5           | 6  | -0.02    | -0.03 | -0.01 | -0.06    | 0.03  | 0.02  | -0.02    | 0.04  | -0.04 |
| 6           | 7  | 0.05     | 0.12  | 0.16  | 0.08     | -0.04 | 0.07  | 0.08     | 0.02  | 0.12  |
| 7           | 6  | -0.01    | 0.07  | 0.07  | 0.09     | -0.02 | 0.10  | -0.04    | -0.13 | -0.09 |
| 8           | 6  | -0.07    | -0.02 | -0.05 | 0.09     | -0.06 | 0.00  | -0.06    | -0.19 | -0.18 |
| 9           | 7  | -0.10    | -0.01 | -0.08 | 0.06     | -0.08 | -0.05 | -0.02    | -0.11 | -0.06 |
| 10          | 6  | 0.02     | 0.06  | 0.10  | 0.06     | -0.11 | -0.01 | 0.18     | 0.12  | 0.22  |
| 11          | 6  | -0.06    | 0.01  | -0.01 | 0.07     | -0.04 | -0.04 | 0.00     | -0.05 | -0.04 |
| 12          | 7  | -0.08    | -0.03 | -0.06 | -0.02    | -0.09 | -0.12 | 0.05     | 0.08  | 0.13  |
| 13          | 6  | -0.05    | 0.01  | -0.02 | 0.00     | -0.05 | -0.02 | 0.02     | 0.03  | 0.09  |
| 14          | 7  | 0.01     | 0.09  | 0.10  | 0.09     | 0.02  | 0.15  | -0.05    | -0.09 | -0.04 |
| 15          | 7  | -0.01    | 0.05  | 0.10  | 0.16     | 0.04  | -0.04 | 0.08     | 0.04  | -0.04 |
| 16          | 6  | -0.01    | -0.05 | -0.05 | 0.00     | 0.02  | -0.03 | 0.00     | 0.03  | -0.01 |
| 17          | 16 | -0.05    | -0.05 | -0.03 | -0.01    | 0.00  | -0.02 | -0.01    | -0.01 | 0.00  |
| 18          | 6  | -0.05    | 0.01  | -0.04 | 0.02     | 0.01  | 0.03  | -0.02    | 0.00  | -0.02 |
| 19          | 8  | -0.06    | 0.01  | 0.10  | -0.07    | 0.02  | 0.01  | -0.07    | 0.03  | 0.00  |
| 20          | 8  | 0.24     | 0.05  | -0.06 | -0.11    | 0.12  | -0.11 | -0.09    | -0.04 | 0.01  |

|             |    |       |          |       |       |          |       |       |          |       |
|-------------|----|-------|----------|-------|-------|----------|-------|-------|----------|-------|
| 21          | 1  | -0.07 | -0.02    | -0.06 | -0.06 | -0.08    | -0.06 | 0.05  | 0.11     | 0.20  |
| 22          | 1  | -0.03 | 0.11     | 0.10  | 0.06  | -0.14    | -0.10 | 0.17  | 0.25     | 0.50  |
| 23          | 1  | -0.07 | 0.09     | 0.01  | -0.12 | 0.02     | 0.10  | -0.03 | 0.11     | -0.02 |
| 24          | 1  | 0.12  | -0.16    | -0.15 | -0.02 | -0.02    | 0.06  | -0.07 | 0.11     | -0.02 |
| 25          | 1  | -0.09 | -0.02    | -0.09 | -0.05 | 0.03     | 0.03  | -0.03 | 0.06     | -0.06 |
| 26          | 1  | 0.04  | -0.06    | 0.02  | -0.10 | -0.02    | -0.03 | 0.01  | 0.04     | -0.01 |
| 27          | 1  | 0.20  | 0.08     | -0.01 | -0.12 | -0.02    | -0.16 | -0.13 | -0.09    | 0.03  |
| 28          | 1  | -0.03 | -0.06    | -0.09 | 0.03  | 0.08     | -0.04 | 0.00  | 0.03     | -0.01 |
| 29          | 1  | 0.00  | -0.06    | -0.05 | 0.04  | -0.03    | -0.05 | 0.02  | 0.05     | 0.01  |
| 30          | 1  | -0.02 | 0.02     | -0.06 | 0.01  | 0.01     | 0.04  | -0.01 | 0.00     | -0.04 |
| 31          | 1  | -0.07 | 0.02     | -0.02 | 0.01  | 0.01     | 0.05  | -0.02 | 0.00     | -0.01 |
| 32          | 1  | -0.06 | 0.03     | -0.04 | 0.06  | 0.01     | 0.02  | -0.04 | 0.02     | -0.01 |
| 33          | 1  | -0.08 | 0.04     | 0.09  | -0.05 | 0.02     | -0.01 | -0.07 | 0.02     | 0.02  |
| 34          | 1  | 0.12  | 0.40     | 0.29  | 0.41  | 0.41     | 0.14  | -0.05 | -0.19    | -0.15 |
| 35          | 1  | -0.07 | 0.07     | -0.01 | 0.04  | 0.12     | -0.24 | 0.12  | 0.22     | 0.23  |
| 36          | 1  | -0.14 | -0.33    | -0.31 | 0.01  | -0.29    | -0.19 | 0.06  | -0.10    | -0.13 |
|             |    |       | 13       |       |       | 14       |       |       | 15       |       |
|             |    |       | A        |       |       | A        |       |       | A        |       |
| Frequencies | -- |       | 227.7473 |       |       | 266.6828 |       |       | 274.5780 |       |
| Red. masses | -- |       | 5.5197   |       |       | 3.7911   |       |       | 1.7807   |       |
| Frc consts  | -- |       | 0.1687   |       |       | 0.1589   |       |       | 0.0791   |       |
| IR Inten    | -- |       | 10.5368  |       |       | 8.3417   |       |       | 7.4127   |       |
| Atom AN     |    | X     | Y        | Z     | X     | Y        | Z     | X     | Y        | Z     |
| 1           | 6  | 0.00  | 0.00     | 0.14  | 0.04  | 0.10     | 0.02  | 0.00  | 0.00     | 0.00  |
| 2           | 6  | -0.15 | 0.01     | 0.19  | 0.07  | 0.09     | 0.02  | 0.00  | 0.00     | 0.00  |
| 3           | 8  | -0.09 | -0.07    | 0.11  | 0.11  | 0.03     | 0.01  | -0.01 | 0.00     | 0.00  |
| 4           | 6  | -0.03 | -0.09    | 0.04  | 0.17  | -0.03    | -0.03 | -0.01 | 0.00     | 0.00  |
| 5           | 6  | 0.04  | -0.05    | 0.13  | 0.12  | 0.03     | 0.01  | -0.01 | 0.00     | 0.00  |
| 6           | 7  | 0.00  | 0.04     | 0.00  | 0.00  | 0.02     | 0.00  | 0.00  | 0.01     | 0.02  |
| 7           | 6  | -0.03 | 0.02     | -0.10 | 0.02  | -0.02    | 0.04  | 0.00  | 0.00     | 0.00  |
| 8           | 6  | -0.03 | 0.02     | -0.10 | 0.02  | -0.01    | 0.08  | 0.03  | 0.02     | 0.04  |
| 9           | 7  | 0.02  | 0.03     | -0.07 | -0.05 | -0.04    | 0.03  | -0.03 | 0.05     | -0.01 |
| 10          | 6  | 0.06  | 0.08     | -0.01 | -0.10 | -0.05    | -0.06 | -0.01 | 0.01     | 0.02  |
| 11          | 6  | 0.01  | 0.01     | -0.01 | 0.01  | 0.00     | 0.05  | 0.03  | 0.03     | 0.05  |
| 12          | 7  | 0.12  | 0.05     | 0.06  | -0.03 | 0.01     | 0.05  | 0.05  | 0.07     | 0.11  |
| 13          | 6  | 0.09  | 0.01     | -0.04 | -0.05 | -0.03    | -0.01 | 0.00  | -0.01    | -0.01 |
| 14          | 7  | 0.01  | -0.02    | -0.17 | -0.05 | -0.06    | -0.02 | -0.04 | -0.07    | -0.09 |
| 15          | 7  | -0.06 | -0.06    | 0.05  | 0.04  | 0.05     | -0.08 | -0.01 | -0.09    | -0.08 |
| 16          | 6  | 0.01  | -0.07    | -0.07 | 0.11  | -0.03    | -0.07 | -0.01 | 0.00     | 0.00  |
| 17          | 16 | -0.05 | -0.03    | -0.05 | -0.06 | -0.03    | 0.03  | 0.00  | 0.00     | 0.00  |
| 18          | 6  | -0.03 | 0.00     | 0.00  | -0.14 | 0.00     | -0.11 | 0.01  | 0.00     | 0.01  |
| 19          | 8  | 0.08  | -0.07    | 0.08  | -0.03 | -0.05    | 0.11  | 0.00  | 0.00     | -0.01 |
| 20          | 8  | 0.06  | 0.23     | -0.11 | -0.06 | 0.08     | -0.07 | 0.01  | 0.00     | 0.01  |
| 21          | 1  | 0.13  | 0.03     | -0.02 | -0.08 | -0.06    | -0.05 | -0.01 | -0.03    | -0.04 |
| 22          | 1  | 0.08  | 0.10     | 0.08  | -0.14 | -0.06    | -0.16 | -0.01 | -0.02    | -0.04 |
| 23          | 1  | -0.10 | -0.12    | 0.22  | 0.09  | 0.07     | 0.02  | -0.01 | 0.00     | 0.00  |
| 24          | 1  | 0.13  | -0.18    | 0.14  | 0.03  | 0.14     | 0.06  | -0.01 | -0.01    | -0.01 |
| 25          | 1  | 0.10  | -0.03    | 0.17  | 0.15  | 0.14     | -0.05 | 0.00  | -0.01    | 0.01  |
| 26          | 1  | -0.06 | -0.12    | 0.01  | 0.15  | -0.05    | -0.05 | -0.01 | 0.00     | 0.00  |
| 27          | 1  | 0.07  | 0.08     | -0.19 | -0.25 | -0.29    | -0.03 | 0.02  | 0.03     | 0.01  |
| 28          | 1  | 0.01  | -0.01    | -0.14 | 0.04  | -0.02    | -0.25 | 0.00  | 0.00     | 0.01  |
| 29          | 1  | 0.06  | -0.16    | -0.11 | 0.23  | -0.06    | -0.04 | -0.02 | 0.00     | 0.00  |
| 30          | 1  | -0.02 | 0.01     | 0.01  | -0.09 | 0.00     | -0.20 | 0.01  | 0.00     | 0.01  |
| 31          | 1  | -0.05 | 0.01     | 0.02  | -0.11 | 0.00     | -0.16 | 0.01  | 0.00     | 0.01  |
| 32          | 1  | 0.00  | 0.00     | -0.01 | -0.27 | 0.02     | -0.09 | 0.02  | 0.00     | 0.01  |
| 33          | 1  | 0.12  | -0.06    | 0.01  | -0.07 | -0.10    | 0.22  | 0.01  | -0.01    | -0.02 |
| 34          | 1  | -0.29 | -0.28    | -0.04 | 0.07  | -0.14    | -0.20 | 0.39  | 0.47     | 0.18  |

|             |    |          |       |       |          |       |       |          |       |       |
|-------------|----|----------|-------|-------|----------|-------|-------|----------|-------|-------|
| 35          | 1  | 0.06     | -0.10 | 0.26  | 0.01     | 0.10  | -0.09 | -0.16    | -0.12 | -0.46 |
| 36          | 1  | 0.08     | 0.16  | -0.02 | -0.08    | 0.02  | 0.12  | -0.15    | -0.41 | -0.30 |
|             |    |          | 16    |       |          | 17    |       |          | 18    |       |
|             |    |          | A     |       |          | A     |       |          | A     |       |
| Frequencies | -- | 277.2364 |       |       | 307.3678 |       |       | 319.0257 |       |       |
| Red. masses | -- | 4.3197   |       |       | 2.8761   |       |       | 4.1599   |       |       |
| Frc consts  | -- | 0.1956   |       |       | 0.1601   |       |       | 0.2495   |       |       |
| IR Inten    | -- | 7.0335   |       |       | 3.8610   |       |       | 1.2580   |       |       |
| Atom AN     |    | X        | Y     | Z     | X        | Y     | Z     | X        | Y     | Z     |
| 1           | 6  | 0.04     | -0.08 | -0.02 | 0.01     | 0.02  | 0.00  | 0.01     | 0.02  | -0.03 |
| 2           | 6  | -0.02    | -0.04 | 0.02  | 0.00     | 0.00  | -0.01 | 0.02     | 0.02  | 0.01  |
| 3           | 8  | -0.02    | -0.04 | -0.02 | -0.02    | 0.08  | 0.04  | -0.02    | 0.08  | -0.01 |
| 4           | 6  | 0.02     | -0.04 | -0.04 | 0.04     | -0.01 | -0.01 | 0.01     | 0.06  | -0.03 |
| 5           | 6  | 0.04     | -0.03 | -0.06 | 0.03     | 0.01  | 0.00  | 0.00     | 0.03  | -0.04 |
| 6           | 7  | 0.00     | -0.01 | 0.01  | -0.05    | -0.11 | -0.09 | 0.09     | -0.01 | 0.13  |
| 7           | 6  | -0.01    | 0.02  | 0.00  | -0.05    | -0.05 | -0.07 | 0.03     | 0.05  | 0.10  |
| 8           | 6  | -0.01    | 0.04  | -0.01 | -0.03    | -0.01 | -0.08 | 0.06     | 0.10  | 0.04  |
| 9           | 7  | 0.02     | 0.02  | -0.02 | 0.10     | 0.08  | 0.04  | 0.11     | -0.09 | -0.15 |
| 10          | 6  | 0.03     | -0.01 | 0.00  | 0.08     | 0.00  | 0.02  | 0.12     | -0.14 | -0.03 |
| 11          | 6  | -0.01    | 0.02  | 0.00  | -0.04    | -0.01 | -0.06 | 0.02     | 0.10  | 0.03  |
| 12          | 7  | 0.01     | 0.02  | 0.00  | -0.02    | -0.01 | -0.04 | 0.03     | 0.08  | 0.01  |
| 13          | 6  | 0.00     | 0.01  | -0.01 | 0.02     | 0.07  | 0.07  | -0.08    | -0.03 | -0.07 |
| 14          | 7  | -0.01    | 0.01  | -0.02 | 0.01     | 0.05  | 0.07  | -0.06    | -0.03 | -0.04 |
| 15          | 7  | -0.06    | -0.04 | 0.04  | -0.07    | -0.09 | 0.09  | -0.16    | -0.10 | 0.11  |
| 16          | 6  | -0.01    | -0.06 | 0.07  | 0.11     | -0.01 | -0.05 | 0.02     | 0.06  | -0.02 |
| 17          | 16 | 0.04     | 0.02  | 0.06  | -0.02    | 0.00  | 0.04  | -0.01    | -0.01 | 0.00  |
| 18          | 6  | 0.00     | 0.01  | -0.01 | -0.08    | 0.00  | -0.06 | -0.01    | 0.00  | -0.01 |
| 19          | 8  | 0.08     | 0.25  | 0.17  | -0.01    | -0.04 | -0.01 | -0.09    | -0.05 | -0.03 |
| 20          | 8  | -0.13    | -0.11 | -0.22 | 0.00     | 0.00  | 0.02  | 0.00     | -0.03 | 0.03  |
| 21          | 1  | 0.00     | 0.01  | -0.02 | 0.07     | 0.15  | 0.19  | -0.17    | -0.11 | -0.19 |
| 22          | 1  | 0.04     | -0.03 | -0.01 | 0.17     | -0.05 | 0.12  | 0.13     | -0.19 | -0.13 |
| 23          | 1  | -0.04    | -0.05 | 0.04  | 0.09     | -0.05 | -0.05 | -0.04    | 0.09  | 0.01  |
| 24          | 1  | 0.05     | -0.06 | 0.04  | 0.01     | 0.04  | 0.02  | -0.01    | 0.06  | -0.02 |
| 25          | 1  | -0.10    | 0.01  | -0.20 | 0.04     | 0.03  | 0.00  | 0.00     | 0.04  | -0.05 |
| 26          | 1  | 0.02     | -0.02 | -0.08 | 0.01     | -0.06 | -0.05 | 0.01     | 0.07  | -0.05 |
| 27          | 1  | -0.20    | -0.44 | -0.29 | -0.07    | -0.08 | 0.05  | -0.07    | -0.08 | 0.08  |
| 28          | 1  | -0.03    | -0.16 | 0.14  | 0.09     | 0.09  | -0.21 | 0.02     | 0.07  | -0.03 |
| 29          | 1  | -0.10    | 0.03  | 0.11  | 0.26     | -0.09 | -0.05 | 0.05     | 0.06  | 0.00  |
| 30          | 1  | 0.02     | 0.02  | -0.01 | -0.05    | 0.00  | -0.13 | -0.01    | 0.00  | -0.02 |
| 31          | 1  | 0.00     | 0.02  | -0.06 | -0.05    | 0.00  | -0.12 | 0.00     | 0.00  | 0.00  |
| 32          | 1  | -0.05    | -0.02 | 0.00  | -0.19    | 0.01  | -0.05 | -0.01    | 0.01  | -0.01 |
| 33          | 1  | -0.14    | 0.46  | 0.19  | -0.03    | -0.08 | 0.06  | -0.09    | -0.13 | 0.06  |
| 34          | 1  | -0.08    | 0.05  | 0.10  | 0.09     | 0.49  | 0.40  | -0.45    | -0.26 | 0.07  |
| 35          | 1  | -0.04    | -0.12 | 0.02  | -0.11    | -0.17 | -0.09 | 0.02     | -0.37 | 0.23  |
| 36          | 1  | 0.03     | -0.02 | -0.07 | 0.12     | -0.04 | -0.10 | 0.17     | -0.02 | -0.15 |
|             |    |          | 19    |       |          | 20    |       |          | 21    |       |
|             |    |          | A     |       |          | A     |       |          | A     |       |
| Frequencies | -- | 333.9578 |       |       | 365.1176 |       |       | 373.2098 |       |       |
| Red. masses | -- | 2.6583   |       |       | 6.7867   |       |       | 3.8975   |       |       |
| Frc consts  | -- | 0.1747   |       |       | 0.5331   |       |       | 0.3198   |       |       |
| IR Inten    | -- | 6.0552   |       |       | 13.3398  |       |       | 11.2264  |       |       |
| Atom AN     |    | X        | Y     | Z     | X        | Y     | Z     | X        | Y     | Z     |
| 1           | 6  | -0.04    | -0.06 | -0.03 | 0.07     | -0.09 | -0.07 | -0.07    | 0.02  | 0.00  |
| 2           | 6  | -0.05    | -0.01 | -0.01 | 0.11     | 0.05  | 0.00  | 0.08     | 0.00  | -0.04 |
| 3           | 8  | -0.06    | 0.03  | 0.02  | -0.01    | 0.27  | 0.24  | 0.21     | -0.18 | -0.01 |
| 4           | 6  | -0.05    | -0.07 | 0.01  | -0.05    | 0.07  | 0.19  | -0.06    | 0.04  | 0.16  |
| 5           | 6  | -0.09    | -0.03 | -0.01 | -0.02    | -0.10 | 0.09  | -0.11    | 0.03  | 0.09  |

|    |    |       |       |       |       |       |       |       |       |       |
|----|----|-------|-------|-------|-------|-------|-------|-------|-------|-------|
| 6  | 7  | 0.01  | 0.03  | 0.03  | -0.03 | 0.01  | -0.01 | 0.04  | -0.02 | 0.00  |
| 7  | 6  | 0.02  | 0.03  | 0.03  | 0.00  | 0.02  | 0.00  | 0.01  | -0.03 | 0.00  |
| 8  | 6  | 0.01  | 0.02  | 0.03  | 0.00  | 0.02  | 0.01  | 0.01  | -0.02 | 0.00  |
| 9  | 7  | -0.04 | -0.03 | -0.04 | -0.03 | 0.01  | -0.01 | 0.04  | -0.02 | 0.01  |
| 10 | 6  | -0.01 | 0.02  | 0.01  | -0.02 | 0.02  | 0.00  | 0.02  | -0.04 | -0.01 |
| 11 | 6  | 0.02  | 0.01  | 0.02  | 0.01  | 0.01  | 0.01  | -0.02 | 0.01  | 0.00  |
| 12 | 7  | 0.02  | 0.00  | 0.01  | 0.02  | -0.01 | -0.01 | -0.04 | 0.02  | 0.01  |
| 13 | 6  | 0.01  | -0.03 | -0.04 | 0.03  | -0.01 | -0.02 | -0.05 | 0.01  | 0.03  |
| 14 | 7  | 0.01  | 0.00  | -0.02 | 0.03  | 0.01  | -0.01 | -0.05 | -0.02 | 0.03  |
| 15 | 7  | 0.03  | 0.03  | -0.03 | 0.02  | 0.03  | -0.02 | -0.05 | -0.03 | 0.04  |
| 16 | 6  | 0.15  | -0.07 | -0.04 | 0.01  | 0.09  | -0.09 | 0.02  | 0.10  | -0.04 |
| 17 | 16 | 0.01  | 0.04  | 0.11  | -0.09 | -0.07 | -0.16 | 0.00  | -0.03 | -0.01 |
| 18 | 6  | -0.08 | 0.01  | -0.08 | 0.00  | 0.00  | 0.02  | 0.00  | 0.00  | -0.01 |
| 19 | 8  | 0.04  | 0.07  | -0.07 | 0.08  | 0.01  | 0.11  | 0.05  | 0.07  | -0.07 |
| 20 | 8  | 0.03  | -0.06 | 0.03  | -0.04 | -0.24 | -0.05 | -0.10 | 0.09  | -0.10 |
| 21 | 1  | -0.01 | -0.07 | -0.09 | 0.03  | -0.02 | -0.04 | -0.07 | 0.03  | 0.04  |
| 22 | 1  | -0.03 | 0.04  | 0.01  | -0.02 | 0.02  | 0.02  | 0.02  | -0.05 | -0.04 |
| 23 | 1  | -0.07 | 0.05  | -0.01 | 0.19  | 0.17  | -0.09 | 0.10  | 0.03  | -0.06 |
| 24 | 1  | -0.04 | -0.09 | -0.08 | -0.01 | -0.03 | -0.14 | -0.09 | 0.01  | -0.07 |
| 25 | 1  | -0.10 | -0.07 | 0.01  | -0.17 | -0.26 | 0.09  | -0.13 | -0.09 | 0.17  |
| 26 | 1  | -0.11 | -0.19 | 0.01  | -0.05 | 0.05  | 0.20  | 0.00  | 0.01  | 0.39  |
| 27 | 1  | 0.26  | 0.34  | -0.04 | 0.18  | 0.01  | -0.16 | 0.10  | 0.22  | -0.24 |
| 28 | 1  | 0.15  | 0.14  | -0.28 | 0.05  | 0.29  | -0.22 | 0.08  | 0.34  | -0.17 |
| 29 | 1  | 0.40  | -0.24 | -0.06 | 0.13  | -0.15 | -0.23 | 0.22  | -0.10 | -0.11 |
| 30 | 1  | -0.04 | 0.01  | -0.17 | -0.03 | 0.00  | 0.07  | 0.00  | -0.01 | -0.03 |
| 31 | 1  | -0.03 | 0.00  | -0.18 | -0.06 | 0.00  | 0.14  | 0.00  | -0.01 | 0.02  |
| 32 | 1  | -0.27 | -0.01 | -0.05 | 0.15  | 0.03  | 0.00  | 0.00  | 0.03  | -0.01 |
| 33 | 1  | 0.07  | 0.14  | -0.20 | 0.07  | 0.12  | -0.01 | 0.20  | 0.12  | -0.33 |
| 34 | 1  | -0.03 | -0.17 | -0.13 | 0.02  | -0.07 | -0.08 | -0.06 | 0.08  | 0.11  |
| 35 | 1  | 0.04  | 0.05  | 0.03  | 0.02  | 0.04  | -0.02 | -0.03 | -0.10 | 0.01  |
| 36 | 1  | -0.04 | -0.01 | -0.01 | -0.05 | -0.03 | -0.02 | 0.05  | 0.01  | 0.02  |

|             |    | 22       |       |       | 23       |       |       | 24       |       |       |
|-------------|----|----------|-------|-------|----------|-------|-------|----------|-------|-------|
|             |    | A        |       |       | A        |       |       | A        |       |       |
| Frequencies | -- | 395.3072 |       |       | 406.2085 |       |       | 421.1467 |       |       |
| Red. masses | -- | 1.5606   |       |       | 2.3077   |       |       | 2.3574   |       |       |
| Frc consts  | -- | 0.1437   |       |       | 0.2244   |       |       | 0.2463   |       |       |
| IR Inten    | -- | 66.6300  |       |       | 78.8943  |       |       | 43.9891  |       |       |
| Atom        | AN | X        | Y     | Z     | X        | Y     | Z     | X        | Y     | Z     |
| 1           | 6  | -0.01    | 0.02  | -0.01 | 0.01     | -0.03 | 0.00  | 0.06     | -0.02 | 0.04  |
| 2           | 6  | -0.01    | 0.06  | 0.02  | 0.00     | -0.02 | 0.02  | -0.02    | -0.08 | 0.04  |
| 3           | 8  | 0.02     | 0.03  | 0.00  | -0.03    | -0.02 | -0.01 | -0.03    | -0.08 | -0.03 |
| 4           | 6  | 0.06     | -0.04 | -0.04 | -0.04    | 0.04  | 0.02  | 0.00     | 0.11  | -0.03 |
| 5           | 6  | 0.02     | 0.00  | -0.03 | -0.02    | 0.00  | 0.00  | 0.06     | 0.02  | -0.01 |
| 6           | 7  | 0.04     | 0.02  | 0.04  | 0.05     | 0.06  | 0.11  | -0.05    | -0.05 | -0.06 |
| 7           | 6  | -0.01    | -0.02 | -0.02 | -0.03    | -0.01 | -0.03 | 0.00     | 0.01  | 0.01  |
| 8           | 6  | -0.01    | -0.03 | -0.04 | -0.02    | -0.03 | -0.07 | 0.01     | 0.03  | 0.03  |
| 9           | 7  | 0.04     | 0.04  | 0.04  | 0.04     | 0.16  | 0.11  | -0.04    | 0.02  | -0.02 |
| 10          | 6  | -0.02    | -0.05 | -0.04 | -0.08    | -0.09 | -0.03 | 0.01     | 0.05  | 0.05  |
| 11          | 6  | -0.01    | -0.02 | -0.03 | -0.01    | -0.04 | -0.06 | 0.01     | 0.01  | 0.02  |
| 12          | 7  | 0.00     | 0.01  | 0.01  | 0.01     | 0.00  | -0.01 | 0.00     | -0.02 | -0.02 |
| 13          | 6  | -0.01    | 0.01  | 0.02  | 0.03     | 0.02  | 0.02  | 0.01     | -0.01 | -0.01 |
| 14          | 7  | -0.02    | -0.01 | -0.01 | -0.01    | -0.02 | -0.03 | 0.02     | 0.01  | 0.01  |
| 15          | 7  | 0.00     | -0.02 | 0.01  | 0.04     | -0.01 | -0.02 | 0.01     | 0.02  | -0.01 |
| 16          | 6  | -0.02    | -0.06 | 0.02  | 0.02     | 0.06  | -0.02 | 0.02     | 0.15  | -0.03 |
| 17          | 16 | -0.01    | 0.01  | -0.01 | 0.01     | 0.00  | 0.02  | 0.02     | 0.00  | 0.03  |
| 18          | 6  | 0.00     | -0.01 | 0.01  | 0.00     | 0.01  | -0.01 | 0.00     | 0.00  | -0.01 |
| 19          | 8  | -0.03    | 0.00  | 0.05  | -0.01    | -0.01 | -0.03 | -0.07    | -0.07 | 0.06  |

|             |    |          |       |       |          |       |       |          |       |       |
|-------------|----|----------|-------|-------|----------|-------|-------|----------|-------|-------|
| 20          | 8  | -0.04    | -0.02 | 0.01  | 0.03     | -0.02 | -0.01 | -0.05    | -0.06 | -0.06 |
| 21          | 1  | 0.01     | 0.04  | 0.06  | 0.06     | 0.07  | 0.09  | 0.01     | -0.02 | -0.03 |
| 22          | 1  | -0.03    | -0.10 | -0.18 | -0.10    | -0.24 | -0.42 | 0.04     | 0.05  | 0.12  |
| 23          | 1  | -0.01    | 0.08  | 0.02  | -0.08    | 0.03  | 0.05  | 0.00     | -0.16 | 0.06  |
| 24          | 1  | -0.01    | 0.03  | 0.00  | 0.02     | -0.04 | 0.00  | 0.12     | -0.03 | 0.15  |
| 25          | 1  | 0.03     | 0.06  | -0.07 | -0.04    | -0.04 | 0.02  | 0.03     | 0.02  | -0.04 |
| 26          | 1  | 0.06     | -0.02 | -0.07 | -0.04    | 0.04  | 0.03  | 0.04     | 0.21  | -0.06 |
| 27          | 1  | 0.47     | 0.65  | -0.22 | -0.17    | -0.27 | 0.09  | 0.41     | 0.41  | -0.32 |
| 28          | 1  | -0.05    | -0.19 | 0.08  | 0.04     | 0.16  | -0.07 | 0.04     | 0.23  | -0.06 |
| 29          | 1  | -0.13    | 0.03  | 0.03  | 0.12     | 0.00  | -0.02 | 0.13     | 0.13  | 0.00  |
| 30          | 1  | -0.01    | -0.01 | 0.03  | 0.00     | 0.00  | -0.03 | 0.00     | -0.01 | -0.04 |
| 31          | 1  | 0.00     | -0.01 | 0.01  | 0.00     | 0.00  | -0.02 | 0.02     | -0.01 | -0.02 |
| 32          | 1  | 0.02     | -0.01 | 0.00  | -0.03    | 0.01  | 0.00  | -0.04    | 0.01  | 0.00  |
| 33          | 1  | 0.20     | 0.03  | -0.27 | -0.15    | -0.03 | 0.17  | -0.06    | -0.16 | 0.15  |
| 34          | 1  | -0.03    | 0.06  | 0.06  | -0.15    | -0.14 | -0.05 | -0.07    | -0.16 | -0.10 |
| 35          | 1  | 0.01     | 0.02  | 0.08  | 0.12     | 0.19  | 0.36  | 0.05     | 0.04  | 0.08  |
| 36          | 1  | 0.04     | 0.00  | 0.02  | -0.08    | -0.35 | -0.23 | -0.12    | -0.26 | -0.19 |
|             |    |          | 25    |       |          | 26    |       |          | 27    |       |
|             |    |          | A     |       |          | A     |       |          | A     |       |
| Frequencies | -- | 427.0065 |       |       | 460.5979 |       |       | 527.5848 |       |       |
| Red. masses | -- | 1.5923   |       |       | 1.1672   |       |       | 6.9412   |       |       |
| Frc consts  | -- | 0.1711   |       |       | 0.1459   |       |       | 1.1383   |       |       |
| IR Inten    | -- | 101.3180 |       |       | 54.1080  |       |       | 5.3483   |       |       |
| Atom AN     |    | X        | Y     | Z     | X        | Y     | Z     | X        | Y     | Z     |
| 1           | 6  | -0.03    | 0.03  | 0.00  | 0.02     | -0.02 | -0.01 | -0.01    | 0.01  | 0.01  |
| 2           | 6  | 0.02     | 0.02  | -0.03 | -0.01    | -0.02 | 0.01  | 0.01     | -0.01 | 0.00  |
| 3           | 8  | 0.02     | 0.03  | 0.01  | -0.02    | -0.01 | -0.01 | 0.00     | 0.00  | 0.01  |
| 4           | 6  | 0.02     | -0.05 | 0.00  | 0.00     | 0.02  | -0.01 | 0.00     | -0.01 | 0.00  |
| 5           | 6  | -0.01    | 0.00  | 0.01  | 0.01     | 0.00  | 0.00  | -0.01    | 0.01  | 0.00  |
| 6           | 7  | -0.04    | -0.07 | -0.07 | 0.00     | 0.00  | 0.01  | 0.01     | -0.04 | 0.03  |
| 7           | 6  | 0.01     | -0.01 | 0.02  | 0.00     | 0.01  | 0.00  | 0.08     | -0.13 | 0.03  |
| 8           | 6  | 0.05     | 0.03  | 0.04  | -0.01    | 0.00  | 0.00  | 0.00     | -0.09 | 0.09  |
| 9           | 7  | -0.02    | 0.06  | -0.01 | 0.00     | 0.00  | 0.00  | -0.08    | -0.12 | 0.15  |
| 10          | 6  | 0.03     | 0.03  | 0.06  | -0.01    | 0.00  | 0.00  | -0.10    | -0.05 | 0.12  |
| 11          | 6  | 0.04     | 0.02  | 0.01  | -0.01    | 0.00  | 0.00  | -0.11    | 0.17  | -0.13 |
| 12          | 7  | -0.02    | -0.01 | -0.03 | 0.01     | 0.00  | 0.00  | 0.17     | 0.13  | -0.20 |
| 13          | 6  | -0.03    | 0.00  | 0.00  | 0.01     | 0.00  | 0.00  | 0.15     | 0.11  | -0.08 |
| 14          | 7  | -0.01    | -0.01 | 0.04  | 0.01     | 0.00  | -0.01 | 0.22     | -0.18 | -0.04 |
| 15          | 7  | 0.01     | -0.01 | 0.00  | 0.00     | 0.01  | 0.00  | -0.23    | 0.20  | 0.03  |
| 16          | 6  | -0.01    | -0.07 | 0.02  | 0.00     | 0.04  | -0.01 | 0.00     | -0.01 | 0.00  |
| 17          | 16 | -0.01    | 0.00  | -0.02 | 0.00     | 0.01  | 0.02  | 0.00     | 0.00  | 0.00  |
| 18          | 6  | 0.00     | 0.00  | 0.01  | 0.00     | -0.01 | 0.00  | 0.00     | 0.00  | 0.00  |
| 19          | 8  | 0.02     | 0.02  | 0.00  | -0.04    | -0.02 | 0.05  | -0.01    | 0.01  | -0.02 |
| 20          | 8  | -0.01    | 0.05  | 0.02  | 0.02     | -0.02 | -0.02 | -0.02    | 0.01  | 0.00  |
| 21          | 1  | -0.05    | -0.01 | -0.01 | 0.02     | 0.00  | 0.00  | 0.03     | 0.24  | 0.05  |
| 22          | 1  | 0.07     | -0.02 | 0.06  | -0.01    | 0.00  | 0.00  | -0.17    | -0.03 | 0.02  |
| 23          | 1  | 0.07     | -0.01 | -0.06 | -0.02    | -0.02 | 0.01  | 0.01     | -0.01 | 0.00  |
| 24          | 1  | -0.05    | 0.04  | -0.03 | 0.03     | -0.02 | 0.01  | 0.00     | 0.01  | 0.02  |
| 25          | 1  | 0.02     | 0.03  | 0.01  | 0.00     | 0.02  | -0.03 | 0.00     | 0.02  | 0.01  |
| 26          | 1  | 0.01     | -0.08 | 0.01  | 0.00     | 0.05  | -0.04 | 0.00     | -0.02 | 0.01  |
| 27          | 1  | -0.08    | -0.02 | 0.05  | -0.20    | -0.27 | 0.10  | 0.01     | 0.03  | -0.02 |
| 28          | 1  | -0.03    | -0.14 | 0.05  | 0.00     | 0.05  | -0.02 | 0.00     | -0.03 | 0.01  |
| 29          | 1  | -0.09    | -0.03 | 0.01  | 0.03     | 0.03  | 0.00  | -0.02    | 0.00  | 0.00  |
| 30          | 1  | 0.00     | 0.00  | 0.02  | -0.01    | -0.02 | -0.01 | 0.00     | 0.00  | 0.00  |
| 31          | 1  | -0.01    | 0.00  | 0.01  | 0.02     | -0.02 | 0.00  | 0.00     | 0.00  | 0.00  |
| 32          | 1  | 0.02     | -0.01 | 0.00  | -0.01    | 0.00  | 0.00  | 0.00     | 0.00  | 0.00  |
| 33          | 1  | 0.13     | 0.05  | -0.18 | 0.57     | -0.01 | -0.73 | -0.01    | -0.01 | 0.01  |

|             |    |          |       |       |          |       |       |          |       |       |
|-------------|----|----------|-------|-------|----------|-------|-------|----------|-------|-------|
| 34          | 1  | -0.23    | -0.28 | -0.11 | 0.02     | 0.01  | -0.01 | -0.32    | 0.20  | 0.04  |
| 35          | 1  | 0.14     | 0.03  | 0.31  | -0.01    | 0.02  | -0.02 | -0.20    | -0.14 | -0.21 |
| 36          | 1  | -0.19    | -0.59 | -0.42 | 0.01     | 0.04  | 0.02  | -0.21    | -0.36 | 0.06  |
|             |    |          | 28    |       |          |       | 29    |          |       | 30    |
|             |    |          | A     |       |          |       | A     |          |       | A     |
| Frequencies | -- | 546.4439 |       |       | 560.4285 |       |       | 584.7210 |       |       |
| Red. masses | -- | 3.1701   |       |       | 4.8263   |       |       | 2.2101   |       |       |
| Frc consts  | -- | 0.5577   |       |       | 0.8931   |       |       | 0.4452   |       |       |
| IR Inten    | -- | 183.0137 |       |       | 20.1119  |       |       | 140.6708 |       |       |
| Atom AN     |    | X        | Y     | Z     | X        | Y     | Z     | X        | Y     | Z     |
| 1           | 6  | 0.00     | -0.02 | -0.02 | 0.02     | 0.01  | 0.03  | 0.03     | -0.02 | 0.03  |
| 2           | 6  | -0.06    | 0.05  | 0.01  | 0.06     | -0.06 | 0.04  | 0.00     | -0.03 | 0.06  |
| 3           | 8  | -0.02    | 0.00  | -0.04 | 0.03     | -0.01 | 0.09  | 0.02     | -0.02 | 0.10  |
| 4           | 6  | -0.04    | 0.02  | -0.01 | 0.07     | -0.02 | 0.02  | 0.05     | -0.01 | 0.02  |
| 5           | 6  | 0.01     | -0.05 | 0.01  | -0.02    | 0.08  | -0.04 | -0.01    | 0.06  | -0.05 |
| 6           | 7  | 0.06     | 0.05  | -0.05 | -0.06    | -0.03 | 0.09  | -0.03    | -0.03 | -0.03 |
| 7           | 6  | 0.09     | -0.01 | 0.03  | -0.11    | 0.07  | 0.00  | 0.03     | 0.04  | 0.06  |
| 8           | 6  | 0.14     | 0.04  | 0.14  | -0.01    | 0.20  | 0.15  | -0.02    | -0.03 | -0.01 |
| 9           | 7  | -0.05    | -0.08 | -0.02 | 0.02     | -0.02 | -0.11 | -0.01    | -0.01 | 0.03  |
| 10          | 6  | -0.03    | 0.08  | -0.05 | 0.07     | -0.09 | 0.04  | -0.02    | 0.01  | -0.01 |
| 11          | 6  | 0.00     | -0.06 | -0.14 | -0.11    | -0.10 | -0.03 | -0.03    | 0.00  | -0.04 |
| 12          | 7  | -0.07    | 0.03  | -0.06 | -0.01    | -0.17 | -0.04 | 0.04     | 0.06  | 0.06  |
| 13          | 6  | -0.03    | 0.11  | 0.10  | 0.16     | 0.03  | 0.13  | -0.02    | -0.03 | -0.09 |
| 14          | 7  | -0.09    | -0.09 | -0.06 | -0.03    | -0.04 | -0.17 | 0.04     | 0.01  | 0.03  |
| 15          | 7  | 0.04     | -0.09 | 0.01  | 0.01     | 0.09  | -0.01 | -0.01    | -0.07 | -0.08 |
| 16          | 6  | -0.01    | 0.03  | -0.01 | 0.02     | -0.03 | 0.02  | 0.02     | -0.01 | 0.02  |
| 17          | 16 | 0.01     | 0.00  | 0.01  | -0.01    | 0.00  | -0.02 | -0.01    | 0.00  | -0.02 |
| 18          | 6  | 0.01     | 0.00  | 0.00  | -0.01    | 0.00  | 0.00  | -0.01    | 0.00  | 0.00  |
| 19          | 8  | 0.04     | -0.03 | 0.05  | -0.08    | 0.05  | -0.11 | -0.07    | 0.04  | -0.10 |
| 20          | 8  | 0.03     | -0.03 | 0.01  | -0.02    | 0.01  | -0.02 | 0.01     | -0.02 | -0.02 |
| 21          | 1  | 0.02     | 0.27  | 0.31  | 0.40     | 0.22  | 0.41  | -0.11    | -0.13 | -0.23 |
| 22          | 1  | -0.08    | 0.20  | 0.09  | 0.12     | -0.14 | 0.06  | 0.00     | 0.06  | 0.12  |
| 23          | 1  | -0.05    | 0.02  | 0.01  | 0.04     | 0.01  | 0.03  | 0.06     | -0.03 | 0.03  |
| 24          | 1  | 0.00     | -0.04 | -0.04 | 0.03     | 0.02  | 0.07  | 0.08     | -0.03 | 0.11  |
| 25          | 1  | 0.01     | -0.07 | 0.03  | -0.04    | 0.11  | -0.08 | -0.04    | 0.08  | -0.09 |
| 26          | 1  | -0.03    | 0.04  | -0.02 | 0.06     | -0.05 | 0.05  | 0.05     | -0.02 | 0.04  |
| 27          | 1  | -0.02    | -0.03 | 0.06  | 0.02     | 0.00  | -0.06 | 0.01     | -0.06 | -0.03 |
| 28          | 1  | 0.01     | 0.09  | -0.03 | -0.01    | -0.12 | 0.06  | 0.00     | -0.08 | 0.04  |
| 29          | 1  | 0.05     | -0.01 | -0.02 | -0.07    | 0.03  | 0.03  | -0.04    | 0.03  | 0.02  |
| 30          | 1  | 0.00     | 0.00  | -0.01 | -0.01    | 0.00  | 0.01  | -0.01    | 0.00  | 0.01  |
| 31          | 1  | 0.01     | 0.00  | -0.01 | -0.02    | 0.00  | 0.01  | -0.01    | 0.00  | 0.01  |
| 32          | 1  | -0.01    | 0.00  | 0.00  | 0.01     | 0.00  | 0.00  | 0.00     | 0.00  | 0.00  |
| 33          | 1  | 0.01     | 0.01  | 0.04  | -0.04    | -0.02 | -0.06 | -0.03    | -0.03 | -0.06 |
| 34          | 1  | -0.14    | 0.35  | 0.31  | 0.15     | 0.05  | -0.06 | -0.08    | 0.37  | 0.22  |
| 35          | 1  | 0.15     | 0.16  | 0.48  | -0.12    | 0.35  | -0.03 | 0.06     | 0.46  | 0.56  |
| 36          | 1  | -0.13    | 0.01  | 0.15  | 0.08     | 0.02  | -0.14 | 0.02     | 0.11  | 0.11  |
|             |    |          | 31    |       |          |       | 32    |          |       | 33    |
|             |    |          | A     |       |          |       | A     |          |       | A     |
| Frequencies | -- | 594.1399 |       |       | 631.6526 |       |       | 639.5570 |       |       |
| Red. masses | -- | 3.0565   |       |       | 5.7610   |       |       | 5.3126   |       |       |
| Frc consts  | -- | 0.6357   |       |       | 1.3543   |       |       | 1.2803   |       |       |
| IR Inten    | -- | 39.2051  |       |       | 56.8790  |       |       | 179.0108 |       |       |
| Atom AN     |    | X        | Y     | Z     | X        | Y     | Z     | X        | Y     | Z     |
| 1           | 6  | 0.05     | -0.05 | 0.03  | 0.01     | -0.04 | -0.02 | -0.07    | -0.02 | -0.15 |
| 2           | 6  | -0.04    | 0.02  | 0.13  | -0.14    | 0.13  | 0.11  | -0.23    | 0.29  | 0.12  |
| 3           | 8  | 0.02     | -0.04 | 0.13  | 0.03     | -0.02 | 0.03  | 0.12     | -0.13 | 0.01  |
| 4           | 6  | 0.06     | 0.00  | 0.02  | 0.01     | 0.01  | -0.01 | 0.07     | 0.02  | 0.00  |

|    |    |       |       |       |       |       |       |       |       |       |
|----|----|-------|-------|-------|-------|-------|-------|-------|-------|-------|
| 5  | 6  | -0.01 | 0.06  | -0.07 | 0.00  | -0.02 | -0.05 | 0.02  | -0.10 | -0.09 |
| 6  | 7  | 0.02  | 0.04  | -0.01 | 0.21  | -0.01 | -0.14 | -0.13 | -0.03 | 0.02  |
| 7  | 6  | 0.01  | -0.07 | -0.05 | 0.12  | 0.01  | -0.12 | -0.14 | -0.07 | 0.01  |
| 8  | 6  | 0.06  | -0.03 | -0.03 | -0.01 | -0.12 | 0.09  | -0.03 | 0.08  | -0.01 |
| 9  | 7  | -0.05 | 0.02  | 0.01  | 0.08  | -0.08 | 0.09  | 0.02  | 0.04  | -0.07 |
| 10 | 6  | -0.05 | 0.07  | -0.03 | 0.11  | 0.02  | -0.07 | 0.00  | -0.01 | 0.00  |
| 11 | 6  | 0.11  | 0.03  | 0.00  | -0.15 | -0.03 | 0.16  | 0.02  | 0.08  | 0.06  |
| 12 | 7  | -0.03 | 0.03  | -0.08 | -0.20 | -0.09 | 0.13  | 0.09  | -0.03 | -0.06 |
| 13 | 6  | -0.05 | 0.05  | 0.05  | 0.02  | 0.07  | -0.06 | 0.04  | -0.09 | 0.04  |
| 14 | 7  | -0.05 | -0.02 | 0.02  | 0.02  | 0.12  | -0.08 | 0.04  | -0.07 | 0.07  |
| 15 | 7  | 0.05  | -0.02 | 0.08  | -0.14 | 0.10  | 0.00  | -0.02 | 0.00  | -0.05 |
| 16 | 6  | 0.02  | 0.00  | 0.02  | 0.01  | 0.02  | 0.00  | -0.02 | 0.10  | -0.02 |
| 17 | 16 | -0.01 | 0.00  | -0.02 | 0.00  | 0.00  | -0.01 | 0.00  | -0.01 | 0.01  |
| 18 | 6  | -0.01 | 0.00  | 0.00  | 0.00  | 0.00  | 0.00  | 0.02  | 0.00  | -0.01 |
| 19 | 8  | -0.10 | 0.06  | -0.12 | -0.02 | 0.02  | -0.02 | 0.05  | 0.01  | 0.04  |
| 20 | 8  | 0.04  | -0.06 | -0.02 | 0.05  | -0.05 | 0.01  | 0.08  | -0.06 | 0.05  |
| 21 | 1  | -0.06 | 0.12  | 0.14  | 0.20  | 0.02  | -0.10 | -0.04 | -0.07 | 0.05  |
| 22 | 1  | -0.08 | 0.10  | -0.02 | 0.01  | 0.09  | -0.13 | 0.13  | -0.08 | 0.14  |
| 23 | 1  | 0.01  | 0.02  | 0.09  | 0.01  | 0.03  | 0.04  | -0.18 | 0.46  | 0.01  |
| 24 | 1  | 0.14  | -0.09 | 0.14  | 0.07  | -0.10 | 0.02  | -0.06 | -0.07 | -0.18 |
| 25 | 1  | -0.07 | 0.08  | -0.13 | -0.03 | -0.03 | -0.07 | 0.00  | -0.10 | -0.11 |
| 26 | 1  | 0.07  | -0.01 | 0.04  | 0.04  | 0.04  | 0.02  | 0.15  | 0.15  | 0.05  |
| 27 | 1  | -0.01 | -0.12 | 0.01  | -0.04 | -0.06 | 0.10  | -0.11 | 0.05  | 0.28  |
| 28 | 1  | 0.00  | -0.07 | 0.05  | 0.01  | 0.04  | 0.00  | -0.01 | 0.14  | -0.05 |
| 29 | 1  | -0.04 | 0.04  | 0.02  | 0.02  | 0.01  | 0.00  | 0.04  | 0.07  | -0.02 |
| 30 | 1  | -0.01 | 0.00  | 0.01  | -0.01 | 0.00  | 0.00  | 0.00  | -0.01 | -0.01 |
| 31 | 1  | -0.01 | 0.00  | 0.01  | 0.00  | 0.00  | 0.00  | 0.02  | 0.00  | 0.00  |
| 32 | 1  | 0.00  | 0.00  | 0.00  | 0.00  | 0.00  | 0.00  | 0.02  | 0.00  | -0.01 |
| 33 | 1  | -0.05 | -0.03 | -0.08 | -0.05 | 0.03  | 0.00  | -0.08 | 0.14  | 0.03  |
| 34 | 1  | 0.00  | -0.30 | -0.09 | -0.02 | -0.07 | -0.13 | 0.02  | 0.09  | 0.00  |
| 35 | 1  | 0.09  | -0.61 | -0.41 | -0.24 | 0.26  | -0.04 | -0.03 | 0.19  | 0.11  |
| 36 | 1  | -0.12 | -0.01 | 0.05  | -0.02 | -0.54 | -0.21 | 0.07  | 0.11  | -0.07 |

|             |    | 34       |       |       | 35       |       |       | 36       |       |       |
|-------------|----|----------|-------|-------|----------|-------|-------|----------|-------|-------|
|             |    | A        |       |       | A        |       |       | A        |       |       |
| Frequencies | -- | 663.3717 |       |       | 689.1671 |       |       | 718.5800 |       |       |
| Red. masses | -- | 6.1039   |       |       | 5.4276   |       |       | 6.2331   |       |       |
| Frc consts  | -- | 1.5826   |       |       | 1.5188   |       |       | 1.8963   |       |       |
| IR Inten    | -- | 73.8797  |       |       | 3.4043   |       |       | 9.2607   |       |       |
| Atom        | AN | X        | Y     | Z     | X        | Y     | Z     | X        | Y     | Z     |
| 1           | 6  | 0.03     | 0.01  | 0.04  | -0.02    | -0.01 | -0.01 | -0.15    | -0.05 | -0.09 |
| 2           | 6  | 0.06     | -0.06 | -0.02 | -0.03    | 0.00  | -0.01 | -0.04    | -0.04 | -0.05 |
| 3           | 8  | -0.03    | 0.03  | -0.02 | -0.01    | -0.03 | -0.05 | 0.00     | -0.05 | 0.13  |
| 4           | 6  | -0.03    | 0.00  | 0.00  | -0.01    | 0.04  | 0.01  | 0.10     | 0.01  | -0.03 |
| 5           | 6  | -0.01    | 0.03  | 0.03  | -0.01    | -0.01 | 0.01  | 0.04     | -0.08 | -0.11 |
| 6           | 7  | 0.07     | 0.05  | 0.10  | 0.00     | 0.00  | 0.00  | 0.01     | -0.14 | 0.06  |
| 7           | 6  | -0.14    | -0.17 | -0.27 | -0.01    | 0.00  | 0.00  | -0.01    | 0.10  | -0.05 |
| 8           | 6  | 0.02     | 0.02  | 0.06  | 0.00     | 0.00  | 0.00  | -0.01    | -0.02 | 0.02  |
| 9           | 7  | -0.03    | -0.08 | -0.01 | 0.00     | 0.00  | 0.00  | -0.08    | -0.12 | 0.10  |
| 10          | 6  | -0.02    | -0.02 | 0.01  | 0.00     | 0.00  | 0.00  | -0.07    | -0.16 | 0.21  |
| 11          | 6  | 0.14     | 0.25  | 0.32  | 0.00     | 0.00  | 0.00  | 0.07     | -0.04 | -0.04 |
| 12          | 7  | -0.07    | -0.07 | -0.16 | 0.00     | 0.00  | 0.00  | -0.02    | 0.07  | -0.02 |
| 13          | 6  | 0.04     | 0.07  | 0.00  | 0.00     | 0.00  | 0.00  | 0.02     | 0.17  | -0.14 |
| 14          | 7  | 0.04     | 0.06  | 0.03  | 0.00     | 0.00  | 0.00  | -0.05    | 0.24  | -0.14 |
| 15          | 7  | -0.03    | -0.14 | -0.13 | 0.00     | 0.00  | 0.00  | 0.13     | -0.10 | 0.03  |
| 16          | 6  | 0.00     | -0.03 | 0.00  | 0.19     | 0.02  | 0.14  | 0.01     | 0.11  | -0.02 |
| 17          | 16 | 0.00     | 0.00  | 0.00  | 0.13     | 0.01  | -0.15 | 0.00     | -0.01 | 0.00  |
| 18          | 6  | 0.00     | 0.00  | 0.00  | -0.43    | 0.00  | 0.21  | 0.00     | 0.00  | 0.00  |

|             |    |          |       |       |          |       |       |          |       |       |
|-------------|----|----------|-------|-------|----------|-------|-------|----------|-------|-------|
| 19          | 8  | -0.01    | 0.00  | -0.01 | 0.02     | -0.01 | 0.02  | 0.04     | 0.00  | 0.05  |
| 20          | 8  | -0.02    | 0.01  | -0.01 | 0.00     | 0.00  | 0.00  | -0.02    | 0.09  | 0.05  |
| 21          | 1  | 0.06     | 0.11  | 0.06  | 0.00     | 0.00  | 0.01  | 0.14     | 0.13  | -0.18 |
| 22          | 1  | -0.08    | 0.05  | 0.02  | 0.00     | -0.01 | -0.01 | -0.13    | -0.18 | 0.05  |
| 23          | 1  | 0.00     | -0.08 | 0.03  | -0.06    | -0.01 | 0.00  | 0.03     | 0.15  | -0.18 |
| 24          | 1  | 0.02     | 0.03  | 0.05  | -0.01    | -0.02 | -0.02 | -0.20    | -0.04 | -0.14 |
| 25          | 1  | -0.01    | 0.02  | 0.04  | -0.01    | -0.04 | 0.04  | 0.09     | 0.00  | -0.13 |
| 26          | 1  | -0.05    | -0.05 | 0.00  | -0.04    | -0.02 | -0.02 | 0.15     | 0.16  | -0.11 |
| 27          | 1  | 0.03     | -0.02 | -0.08 | -0.01    | 0.01  | 0.02  | -0.09    | 0.16  | 0.15  |
| 28          | 1  | 0.00     | -0.04 | 0.00  | 0.26     | 0.00  | 0.35  | -0.01    | 0.04  | 0.00  |
| 29          | 1  | -0.01    | -0.02 | 0.00  | 0.01     | 0.12  | 0.13  | -0.01    | 0.15  | 0.01  |
| 30          | 1  | 0.00     | 0.00  | 0.00  | -0.35    | 0.04  | 0.17  | -0.02    | -0.01 | 0.00  |
| 31          | 1  | 0.00     | 0.00  | 0.00  | -0.36    | -0.02 | 0.17  | 0.01     | -0.01 | 0.00  |
| 32          | 1  | -0.01    | 0.00  | 0.00  | -0.29    | 0.01  | 0.19  | 0.00     | 0.00  | 0.00  |
| 33          | 1  | 0.02     | -0.04 | -0.01 | 0.04     | 0.00  | -0.02 | -0.07    | 0.15  | 0.01  |
| 34          | 1  | 0.02     | 0.27  | 0.13  | 0.00     | 0.00  | 0.00  | 0.06     | -0.09 | 0.05  |
| 35          | 1  | 0.07     | 0.34  | 0.50  | 0.00     | 0.01  | 0.00  | 0.19     | -0.26 | -0.01 |
| 36          | 1  | 0.00     | 0.12  | 0.14  | 0.00     | 0.01  | 0.00  | 0.00     | 0.01  | 0.13  |
|             |    |          | 37    |       |          | 38    |       |          | 39    |       |
|             |    |          | A     |       |          | A     |       |          | A     |       |
| Frequencies | -- | 743.4397 |       |       | 748.0330 |       |       | 775.0346 |       |       |
| Red. masses | -- | 5.7825   |       |       | 5.7383   |       |       | 9.8769   |       |       |
| Frc consts  | -- | 1.8830   |       |       | 1.8918   |       |       | 3.4955   |       |       |
| IR Inten    | -- | 17.3474  |       |       | 10.2126  |       |       | 22.8792  |       |       |
| Atom AN     |    | X        | Y     | Z     | X        | Y     | Z     | X        | Y     | Z     |
| 1           | 6  | 0.08     | 0.05  | 0.00  | 0.20     | 0.12  | 0.02  | 0.03     | 0.03  | -0.01 |
| 2           | 6  | -0.08    | 0.07  | 0.03  | -0.04    | 0.20  | 0.12  | -0.01    | 0.03  | 0.01  |
| 3           | 8  | 0.01     | -0.03 | -0.17 | 0.08     | 0.04  | -0.17 | 0.01     | 0.00  | -0.03 |
| 4           | 6  | -0.05    | 0.05  | 0.05  | -0.10    | -0.04 | 0.06  | -0.01    | 0.00  | 0.02  |
| 5           | 6  | -0.02    | 0.05  | 0.05  | -0.03    | 0.10  | 0.12  | 0.00     | 0.02  | 0.02  |
| 6           | 7  | -0.02    | -0.06 | 0.01  | -0.04    | -0.11 | 0.01  | -0.08    | -0.07 | -0.07 |
| 7           | 6  | -0.03    | 0.02  | -0.01 | -0.06    | 0.03  | -0.03 | 0.21     | 0.28  | 0.39  |
| 8           | 6  | -0.01    | 0.02  | 0.01  | -0.01    | 0.03  | 0.03  | -0.17    | -0.23 | -0.29 |
| 9           | 7  | -0.03    | -0.02 | 0.02  | -0.04    | -0.05 | 0.04  | 0.02     | 0.02  | 0.04  |
| 10          | 6  | -0.02    | -0.05 | 0.06  | -0.04    | -0.10 | 0.11  | -0.01    | -0.03 | 0.02  |
| 11          | 6  | 0.01     | -0.02 | -0.02 | 0.01     | -0.04 | -0.05 | 0.13     | 0.20  | 0.26  |
| 12          | 7  | 0.02     | 0.02  | -0.01 | 0.03     | 0.04  | 0.00  | -0.11    | -0.12 | -0.18 |
| 13          | 6  | 0.01     | 0.03  | -0.04 | 0.01     | 0.06  | -0.08 | 0.09     | 0.16  | 0.13  |
| 14          | 7  | -0.01    | 0.06  | -0.03 | -0.02    | 0.13  | -0.05 | -0.08    | -0.15 | -0.21 |
| 15          | 7  | 0.04     | -0.02 | 0.01  | 0.07     | -0.04 | 0.02  | 0.01     | -0.06 | -0.04 |
| 16          | 6  | 0.29     | -0.07 | 0.32  | -0.18    | -0.13 | -0.14 | -0.01    | -0.02 | 0.00  |
| 17          | 16 | -0.17    | 0.01  | -0.07 | 0.09     | 0.00  | 0.03  | 0.00     | 0.00  | 0.00  |
| 18          | 6  | 0.16     | 0.00  | -0.11 | -0.07    | 0.00  | 0.05  | 0.00     | 0.00  | 0.00  |
| 19          | 8  | 0.00     | -0.01 | 0.01  | -0.04    | 0.00  | -0.04 | 0.00     | 0.00  | 0.00  |
| 20          | 8  | 0.02     | -0.06 | -0.02 | 0.03     | -0.13 | -0.04 | 0.00     | -0.02 | -0.01 |
| 21          | 1  | 0.03     | 0.01  | -0.05 | 0.05     | 0.02  | -0.12 | 0.15     | 0.23  | 0.23  |
| 22          | 1  | -0.01    | -0.07 | 0.04  | -0.01    | -0.12 | 0.16  | 0.04     | -0.04 | 0.12  |
| 23          | 1  | -0.13    | -0.04 | 0.11  | -0.06    | 0.03  | 0.20  | -0.01    | 0.01  | 0.02  |
| 24          | 1  | 0.11     | 0.03  | 0.04  | 0.23     | 0.13  | 0.07  | 0.02     | 0.04  | -0.01 |
| 25          | 1  | -0.06    | -0.05 | 0.10  | -0.10    | -0.02 | 0.15  | 0.00     | 0.00  | 0.03  |
| 26          | 1  | -0.11    | -0.09 | 0.08  | -0.11    | -0.17 | 0.23  | -0.02    | -0.02 | 0.04  |
| 27          | 1  | 0.02     | -0.05 | -0.02 | 0.08     | -0.13 | -0.09 | 0.01     | -0.01 | -0.01 |
| 28          | 1  | 0.35     | 0.05  | 0.34  | -0.16    | -0.04 | -0.20 | -0.01    | 0.01  | -0.02 |
| 29          | 1  | 0.26     | 0.01  | 0.37  | -0.10    | -0.28 | -0.22 | 0.00     | -0.05 | -0.02 |
| 30          | 1  | 0.13     | 0.01  | -0.02 | -0.04    | 0.00  | 0.01  | 0.00     | 0.00  | 0.00  |
| 31          | 1  | 0.05     | 0.02  | 0.00  | -0.05    | 0.00  | 0.01  | -0.01    | 0.00  | 0.00  |
| 32          | 1  | 0.22     | 0.00  | -0.12 | -0.09    | 0.00  | 0.06  | 0.00     | 0.00  | 0.00  |



|             |    |          |       |       |          |       |       |          |       |       |
|-------------|----|----------|-------|-------|----------|-------|-------|----------|-------|-------|
| 33          | 1  | 0.07     | -0.08 | 0.00  | 0.07     | -0.16 | 0.03  | 0.01     | -0.03 | 0.01  |
| 34          | 1  | 0.02     | -0.02 | 0.01  | 0.04     | -0.06 | 0.01  | 0.05     | 0.00  | 0.00  |
| 35          | 1  | 0.04     | -0.06 | -0.01 | 0.08     | -0.12 | -0.03 | 0.05     | 0.04  | 0.14  |
| 36          | 1  | 0.01     | 0.02  | 0.02  | 0.01     | -0.01 | 0.03  | 0.14     | 0.12  | -0.01 |
|             |    |          | 40    |       |          | 41    |       |          | 42    |       |
|             |    |          | A     |       |          | A     |       |          | A     |       |
| Frequencies | -- | 797.0341 |       |       | 816.7617 |       |       | 823.3739 |       |       |
| Red. masses | -- | 4.3847   |       |       | 1.7413   |       |       | 2.0085   |       |       |
| Frc consts  | -- | 1.6411   |       |       | 0.6844   |       |       | 0.8022   |       |       |
| IR Inten    | -- | 26.2582  |       |       | 62.0335  |       |       | 4.0604   |       |       |
| Atom AN     |    | X        | Y     | Z     | X        | Y     | Z     | X        | Y     | Z     |
| 1           | 6  | -0.06    | -0.18 | 0.17  | 0.00     | 0.04  | -0.04 | -0.04    | 0.00  | -0.04 |
| 2           | 6  | 0.15     | 0.05  | 0.21  | 0.00     | -0.02 | -0.04 | -0.04    | 0.01  | -0.04 |
| 3           | 8  | 0.09     | 0.12  | -0.14 | -0.03    | -0.03 | 0.02  | -0.03    | -0.02 | 0.02  |
| 4           | 6  | 0.04     | 0.03  | -0.15 | -0.01    | 0.00  | 0.02  | 0.07     | -0.01 | -0.03 |
| 5           | 6  | -0.16    | -0.20 | 0.03  | 0.02     | 0.04  | 0.01  | -0.06    | 0.09  | 0.17  |
| 6           | 7  | -0.04    | -0.02 | 0.00  | -0.04    | 0.06  | 0.05  | 0.00     | 0.00  | -0.01 |
| 7           | 6  | -0.02    | 0.01  | 0.01  | -0.03    | 0.01  | 0.01  | 0.00     | 0.00  | 0.00  |
| 8           | 6  | -0.01    | 0.00  | 0.00  | 0.00     | -0.02 | 0.02  | 0.00     | 0.00  | 0.00  |
| 9           | 7  | -0.01    | 0.01  | 0.03  | 0.05     | -0.02 | 0.07  | 0.01     | -0.01 | 0.00  |
| 10          | 6  | -0.02    | -0.04 | -0.06 | 0.00     | -0.07 | -0.17 | 0.01     | 0.01  | 0.01  |
| 11          | 6  | 0.00     | 0.00  | 0.00  | -0.01    | -0.01 | 0.00  | 0.00     | 0.00  | 0.00  |
| 12          | 7  | 0.01     | 0.01  | -0.01 | 0.00     | 0.02  | -0.01 | -0.01    | 0.00  | 0.00  |
| 13          | 6  | 0.01     | 0.01  | -0.01 | 0.01     | 0.02  | -0.03 | 0.00     | 0.00  | 0.00  |
| 14          | 7  | -0.01    | 0.02  | -0.01 | 0.00     | 0.01  | -0.01 | 0.00     | 0.00  | 0.00  |
| 15          | 7  | 0.01     | -0.01 | 0.00  | 0.02     | -0.01 | 0.01  | 0.00     | 0.00  | 0.00  |
| 16          | 6  | 0.05     | 0.07  | -0.04 | 0.00     | -0.01 | 0.00  | 0.09     | 0.07  | -0.11 |
| 17          | 16 | -0.01    | 0.00  | 0.01  | 0.00     | 0.00  | 0.00  | -0.01    | -0.01 | 0.02  |
| 18          | 6  | 0.01     | 0.00  | 0.00  | 0.00     | 0.00  | 0.00  | 0.02     | 0.00  | 0.00  |
| 19          | 8  | -0.02    | 0.01  | -0.04 | 0.01     | 0.00  | 0.01  | 0.03     | -0.01 | -0.01 |
| 20          | 8  | -0.01    | 0.06  | 0.02  | 0.00     | -0.01 | 0.00  | 0.03     | -0.06 | -0.04 |
| 21          | 1  | 0.01     | 0.01  | -0.02 | 0.01     | 0.03  | -0.02 | 0.00     | 0.00  | 0.00  |
| 22          | 1  | 0.07     | 0.11  | 0.45  | 0.14     | 0.26  | 0.85  | -0.01    | -0.03 | -0.09 |
| 23          | 1  | 0.15     | -0.10 | 0.28  | -0.08    | 0.08  | -0.02 | -0.05    | 0.08  | -0.06 |
| 24          | 1  | -0.17    | -0.22 | -0.08 | 0.00     | 0.05  | -0.04 | -0.05    | -0.08 | -0.17 |
| 25          | 1  | -0.19    | -0.19 | 0.00  | 0.04     | 0.04  | 0.02  | 0.01     | 0.07  | 0.25  |
| 26          | 1  | 0.03     | -0.04 | -0.07 | -0.02    | -0.01 | -0.01 | -0.05    | -0.28 | 0.01  |
| 27          | 1  | 0.01     | -0.11 | -0.08 | -0.01    | 0.03  | 0.02  | 0.01     | -0.01 | 0.00  |
| 28          | 1  | 0.02     | -0.12 | 0.11  | 0.01     | 0.00  | 0.01  | 0.00     | -0.43 | 0.27  |
| 29          | 1  | -0.11    | 0.29  | 0.06  | 0.00     | -0.01 | 0.00  | -0.40    | 0.48  | -0.01 |
| 30          | 1  | 0.01     | -0.01 | -0.03 | 0.00     | 0.00  | 0.00  | 0.05     | -0.01 | -0.09 |
| 31          | 1  | 0.02     | 0.00  | -0.03 | 0.00     | 0.00  | 0.00  | 0.05     | 0.01  | -0.08 |
| 32          | 1  | -0.04    | 0.00  | 0.01  | 0.00     | 0.00  | 0.00  | -0.14    | 0.01  | 0.03  |
| 33          | 1  | -0.13    | 0.17  | -0.11 | 0.02     | -0.03 | 0.02  | 0.06     | -0.09 | 0.07  |
| 34          | 1  | 0.01     | -0.03 | -0.01 | 0.02     | -0.08 | -0.03 | 0.00     | 0.00  | 0.00  |
| 35          | 1  | 0.02     | -0.02 | -0.01 | 0.02     | -0.06 | -0.04 | 0.00     | 0.00  | 0.00  |
| 36          | 1  | -0.04    | -0.07 | -0.01 | -0.07    | -0.28 | -0.04 | 0.01     | 0.00  | 0.00  |
|             |    |          | 43    |       |          | 44    |       |          | 45    |       |
|             |    |          | A     |       |          | A     |       |          | A     |       |
| Frequencies | -- | 882.9053 |       |       | 908.0130 |       |       | 926.1346 |       |       |
| Red. masses | -- | 6.0751   |       |       | 4.2362   |       |       | 2.0327   |       |       |
| Frc consts  | -- | 2.7902   |       |       | 2.0578   |       |       | 1.0272   |       |       |
| IR Inten    | -- | 129.2362 |       |       | 14.9459  |       |       | 4.2106   |       |       |
| Atom AN     |    | X        | Y     | Z     | X        | Y     | Z     | X        | Y     | Z     |
| 1           | 6  | 0.00     | 0.00  | -0.02 | 0.01     | 0.00  | -0.03 | 0.15     | 0.08  | -0.06 |
| 2           | 6  | -0.07    | -0.02 | -0.02 | -0.03    | 0.00  | 0.00  | 0.00     | -0.01 | 0.00  |
| 3           | 8  | 0.02     | 0.02  | 0.03  | 0.01     | 0.00  | 0.01  | -0.03    | -0.02 | 0.00  |

|    |    |       |       |       |       |       |       |       |       |       |
|----|----|-------|-------|-------|-------|-------|-------|-------|-------|-------|
| 4  | 6  | -0.02 | 0.00  | -0.01 | -0.01 | 0.00  | 0.00  | -0.02 | -0.01 | 0.09  |
| 5  | 6  | 0.01  | 0.03  | 0.00  | 0.01  | 0.01  | 0.00  | -0.01 | -0.11 | -0.09 |
| 6  | 7  | 0.29  | -0.13 | -0.04 | 0.16  | -0.15 | 0.07  | 0.00  | 0.01  | 0.00  |
| 7  | 6  | 0.01  | 0.05  | 0.00  | 0.13  | -0.07 | -0.03 | 0.00  | 0.00  | 0.00  |
| 8  | 6  | 0.00  | 0.05  | -0.07 | 0.02  | 0.07  | -0.03 | 0.00  | 0.00  | 0.00  |
| 9  | 7  | -0.11 | 0.03  | 0.07  | -0.15 | 0.24  | -0.12 | 0.00  | -0.01 | 0.00  |
| 10 | 6  | -0.06 | -0.04 | -0.03 | -0.10 | -0.09 | 0.00  | 0.01  | 0.01  | 0.00  |
| 11 | 6  | 0.02  | 0.03  | 0.01  | -0.01 | -0.01 | 0.01  | 0.00  | 0.00  | 0.00  |
| 12 | 7  | 0.25  | -0.03 | -0.12 | -0.14 | -0.02 | 0.09  | 0.00  | 0.00  | 0.00  |
| 13 | 6  | 0.00  | -0.22 | 0.18  | 0.01  | 0.06  | -0.06 | 0.00  | 0.00  | 0.00  |
| 14 | 7  | -0.24 | 0.15  | 0.00  | 0.12  | -0.10 | 0.01  | 0.00  | 0.00  | 0.00  |
| 15 | 7  | -0.10 | 0.07  | -0.02 | -0.01 | 0.01  | 0.01  | 0.00  | 0.00  | 0.00  |
| 16 | 6  | 0.01  | 0.00  | -0.02 | 0.01  | 0.00  | -0.01 | 0.07  | 0.03  | -0.07 |
| 17 | 16 | 0.00  | 0.00  | 0.00  | 0.00  | 0.00  | 0.00  | -0.01 | 0.00  | 0.01  |
| 18 | 6  | 0.00  | 0.00  | 0.01  | 0.00  | 0.00  | 0.00  | 0.03  | -0.01 | 0.04  |
| 19 | 8  | 0.01  | -0.01 | 0.01  | 0.00  | 0.00  | 0.01  | 0.00  | -0.01 | 0.00  |
| 20 | 8  | 0.00  | 0.00  | 0.00  | -0.02 | 0.01  | 0.01  | -0.06 | 0.06  | 0.06  |
| 21 | 1  | 0.00  | -0.26 | 0.14  | 0.04  | 0.08  | -0.03 | 0.00  | 0.00  | 0.00  |
| 22 | 1  | -0.20 | 0.30  | 0.43  | 0.09  | 0.00  | 0.66  | -0.01 | 0.01  | -0.04 |
| 23 | 1  | 0.16  | -0.18 | -0.12 | 0.02  | -0.02 | -0.03 | -0.04 | -0.17 | 0.09  |
| 24 | 1  | 0.03  | -0.02 | 0.03  | 0.02  | 0.00  | -0.01 | 0.17  | 0.24  | 0.17  |
| 25 | 1  | 0.03  | 0.02  | 0.03  | 0.01  | -0.01 | 0.01  | -0.31 | -0.37 | -0.16 |
| 26 | 1  | -0.01 | -0.03 | 0.04  | -0.01 | -0.01 | 0.02  | -0.06 | -0.11 | 0.10  |
| 27 | 1  | -0.01 | 0.00  | 0.01  | -0.02 | 0.02  | 0.02  | -0.02 | 0.03  | 0.01  |
| 28 | 1  | 0.01  | -0.04 | 0.04  | 0.01  | -0.02 | 0.03  | 0.10  | -0.17 | 0.25  |
| 29 | 1  | -0.05 | 0.04  | -0.02 | -0.04 | 0.01  | -0.02 | -0.31 | 0.14  | -0.17 |
| 30 | 1  | 0.02  | 0.00  | -0.03 | 0.02  | 0.00  | -0.02 | 0.14  | -0.01 | -0.18 |
| 31 | 1  | 0.01  | 0.00  | -0.02 | 0.01  | 0.00  | -0.02 | 0.05  | 0.03  | -0.15 |
| 32 | 1  | -0.04 | 0.00  | 0.01  | -0.04 | 0.00  | 0.01  | -0.32 | 0.02  | 0.09  |
| 33 | 1  | 0.00  | -0.02 | 0.03  | 0.00  | -0.01 | 0.01  | -0.09 | 0.16  | -0.09 |
| 34 | 1  | -0.05 | 0.13  | 0.00  | 0.00  | -0.03 | -0.01 | 0.00  | 0.00  | 0.00  |
| 35 | 1  | -0.14 | 0.19  | 0.01  | -0.03 | 0.00  | -0.02 | 0.00  | 0.00  | 0.00  |
| 36 | 1  | -0.13 | -0.02 | 0.04  | 0.00  | 0.52  | -0.04 | -0.01 | -0.02 | 0.01  |

|             |    | 46       |       |       | 47       |       |       | 48       |       |       |
|-------------|----|----------|-------|-------|----------|-------|-------|----------|-------|-------|
|             |    | A        |       |       | A        |       |       | A        |       |       |
| Frequencies | -- | 957.5366 |       |       | 958.9369 |       |       | 974.5936 |       |       |
| Red. masses | -- | 1.4181   |       |       | 2.0804   |       |       | 2.4676   |       |       |
| Frc consts  | -- | 0.7660   |       |       | 1.1272   |       |       | 1.3809   |       |       |
| IR Inten    | -- | 2.6366   |       |       | 24.8016  |       |       | 16.1597  |       |       |
| Atom        | AN | X        | Y     | Z     | X        | Y     | Z     | X        | Y     | Z     |
| 1           | 6  | 0.00     | 0.00  | 0.00  | 0.03     | 0.02  | -0.03 | 0.03     | 0.16  | -0.12 |
| 2           | 6  | 0.00     | 0.00  | 0.00  | -0.05    | -0.04 | 0.00  | 0.13     | 0.00  | 0.13  |
| 3           | 8  | 0.00     | 0.00  | 0.00  | -0.06    | 0.03  | -0.08 | -0.04    | -0.09 | 0.09  |
| 4           | 6  | 0.00     | 0.00  | 0.00  | 0.19     | -0.05 | 0.13  | -0.07    | 0.02  | -0.13 |
| 5           | 6  | 0.00     | 0.00  | 0.00  | -0.04    | -0.03 | 0.02  | -0.04    | -0.04 | 0.04  |
| 6           | 7  | 0.00     | 0.00  | 0.00  | 0.01     | -0.01 | 0.01  | 0.00     | -0.02 | -0.01 |
| 7           | 6  | 0.01     | 0.02  | 0.02  | 0.01     | 0.00  | 0.00  | 0.01     | 0.00  | -0.01 |
| 8           | 6  | 0.00     | 0.00  | -0.01 | 0.00     | 0.00  | 0.00  | 0.01     | 0.00  | 0.00  |
| 9           | 7  | 0.00     | 0.00  | 0.00  | -0.01    | 0.00  | 0.00  | -0.01    | 0.00  | 0.00  |
| 10          | 6  | 0.00     | 0.00  | 0.00  | 0.00     | 0.01  | -0.01 | 0.00     | 0.01  | 0.00  |
| 11          | 6  | 0.01     | 0.02  | 0.02  | 0.00     | 0.00  | 0.00  | 0.01     | 0.00  | 0.00  |
| 12          | 7  | 0.01     | 0.01  | 0.02  | 0.00     | 0.00  | 0.00  | 0.00     | -0.01 | 0.00  |
| 13          | 6  | -0.07    | -0.10 | -0.13 | 0.00     | 0.00  | 0.01  | 0.00     | -0.01 | 0.01  |
| 14          | 7  | 0.01     | 0.02  | 0.02  | 0.00     | 0.00  | 0.00  | 0.00     | 0.01  | 0.00  |
| 15          | 7  | 0.00     | 0.00  | 0.00  | 0.00     | 0.00  | 0.00  | -0.01    | 0.01  | 0.00  |
| 16          | 6  | 0.00     | 0.00  | 0.00  | -0.02    | 0.08  | 0.01  | 0.01     | -0.02 | 0.01  |
| 17          | 16 | 0.00     | 0.00  | 0.00  | 0.01     | -0.01 | 0.01  | 0.01     | 0.01  | 0.01  |

|             |    |          |       |       |          |       |       |           |       |       |
|-------------|----|----------|-------|-------|----------|-------|-------|-----------|-------|-------|
| 18          | 6  | 0.00     | 0.00  | 0.00  | -0.05    | 0.03  | -0.08 | -0.03     | 0.01  | -0.05 |
| 19          | 8  | 0.00     | 0.00  | 0.00  | 0.00     | 0.01  | -0.02 | 0.00      | 0.00  | 0.00  |
| 20          | 8  | 0.00     | 0.00  | 0.00  | -0.01    | 0.01  | 0.01  | 0.01      | -0.03 | -0.01 |
| 21          | 1  | 0.38     | 0.52  | 0.74  | -0.01    | -0.02 | -0.02 | 0.01      | -0.01 | 0.00  |
| 22          | 1  | 0.00     | 0.00  | 0.00  | 0.00     | 0.02  | 0.02  | -0.01     | 0.00  | -0.06 |
| 23          | 1  | 0.00     | 0.00  | 0.00  | -0.17    | -0.22 | 0.14  | 0.17      | -0.28 | 0.23  |
| 24          | 1  | 0.00     | 0.00  | 0.00  | 0.04     | 0.02  | 0.01  | -0.24     | 0.29  | -0.48 |
| 25          | 1  | 0.00     | 0.00  | 0.00  | -0.13    | -0.09 | -0.02 | -0.07     | -0.10 | 0.06  |
| 26          | 1  | 0.00     | 0.00  | 0.00  | 0.13     | -0.15 | 0.12  | -0.09     | 0.01  | -0.20 |
| 27          | 1  | 0.00     | 0.00  | 0.00  | -0.01    | 0.03  | 0.01  | -0.07     | 0.11  | 0.13  |
| 28          | 1  | 0.00     | 0.00  | 0.00  | -0.18    | -0.09 | -0.21 | 0.00      | -0.01 | -0.02 |
| 29          | 1  | 0.00     | 0.00  | 0.00  | 0.06     | 0.07  | 0.05  | 0.12      | 0.10  | 0.16  |
| 30          | 1  | -0.01    | 0.00  | 0.01  | -0.36    | -0.03 | 0.35  | -0.13     | 0.02  | 0.17  |
| 31          | 1  | 0.00     | 0.00  | 0.00  | 0.04     | -0.10 | 0.22  | -0.06     | -0.03 | 0.15  |
| 32          | 1  | 0.01     | 0.00  | 0.00  | 0.53     | -0.07 | -0.16 | 0.30      | -0.01 | -0.09 |
| 33          | 1  | 0.00     | 0.00  | 0.00  | -0.04    | 0.07  | -0.04 | -0.05     | 0.06  | -0.02 |
| 34          | 1  | 0.00     | 0.00  | 0.00  | -0.01    | 0.01  | 0.00  | -0.03     | 0.03  | 0.01  |
| 35          | 1  | 0.00     | 0.00  | 0.01  | 0.00     | 0.00  | 0.00  | 0.00      | -0.01 | 0.00  |
| 36          | 1  | 0.00     | 0.00  | 0.00  | -0.02    | 0.00  | 0.01  | -0.02     | 0.02  | 0.02  |
|             |    |          | 49    |       |          | 50    |       |           | 51    |       |
|             |    |          | A     |       |          | A     |       |           | A     |       |
| Frequencies | -- | 984.1521 |       |       | 992.8343 |       |       | 1020.1988 |       |       |
| Red. masses | -- | 1.2084   |       |       | 1.7787   |       |       | 2.3920    |       |       |
| Frc consts  | -- | 0.6896   |       |       | 1.0330   |       |       | 1.4668    |       |       |
| IR Inten    | -- | 10.5179  |       |       | 24.2387  |       |       | 170.9621  |       |       |
| Atom AN     |    | X        | Y     | Z     | X        | Y     | Z     | X         | Y     | Z     |
| 1           | 6  | 0.01     | 0.00  | 0.01  | 0.09     | -0.04 | 0.05  | -0.01     | 0.02  | -0.02 |
| 2           | 6  | 0.00     | 0.01  | -0.01 | -0.03    | 0.04  | -0.08 | -0.03     | -0.03 | 0.01  |
| 3           | 8  | 0.01     | -0.01 | 0.01  | 0.05     | -0.01 | 0.06  | 0.03      | 0.02  | 0.00  |
| 4           | 6  | -0.03    | 0.00  | -0.03 | -0.11    | 0.01  | -0.09 | 0.00      | 0.00  | -0.01 |
| 5           | 6  | 0.00     | 0.00  | 0.00  | -0.02    | 0.00  | -0.02 | -0.01     | 0.01  | 0.00  |
| 6           | 7  | 0.00     | 0.00  | 0.00  | 0.00     | 0.01  | 0.00  | 0.07      | -0.03 | -0.01 |
| 7           | 6  | 0.00     | 0.00  | 0.00  | -0.01    | 0.00  | 0.01  | -0.05     | 0.01  | 0.03  |
| 8           | 6  | 0.00     | 0.00  | 0.00  | -0.01    | 0.00  | 0.00  | -0.09     | 0.02  | 0.04  |
| 9           | 7  | 0.00     | 0.00  | 0.00  | 0.01     | 0.00  | 0.00  | -0.02     | 0.01  | 0.00  |
| 10          | 6  | 0.00     | 0.00  | 0.00  | 0.00     | -0.01 | 0.01  | 0.05      | 0.03  | -0.05 |
| 11          | 6  | 0.00     | 0.00  | 0.00  | -0.01    | 0.00  | 0.00  | -0.11     | -0.07 | 0.08  |
| 12          | 7  | 0.00     | 0.00  | 0.00  | 0.00     | 0.01  | 0.00  | 0.07      | 0.09  | -0.11 |
| 13          | 6  | 0.00     | 0.00  | 0.00  | 0.00     | 0.01  | 0.00  | -0.02     | 0.09  | -0.06 |
| 14          | 7  | 0.00     | 0.00  | 0.00  | 0.00     | -0.01 | 0.00  | 0.00      | -0.07 | 0.05  |
| 15          | 7  | 0.00     | 0.00  | 0.00  | 0.01     | -0.01 | 0.00  | 0.05      | -0.10 | 0.07  |
| 16          | 6  | 0.01     | -0.01 | 0.01  | 0.04     | 0.00  | -0.04 | 0.00      | 0.00  | 0.00  |
| 17          | 16 | 0.00     | -0.02 | -0.01 | 0.01     | 0.00  | 0.03  | 0.00      | 0.00  | 0.00  |
| 18          | 6  | 0.01     | 0.12  | 0.02  | -0.05    | 0.00  | -0.08 | 0.00      | 0.00  | 0.00  |
| 19          | 8  | 0.00     | 0.00  | 0.00  | 0.01     | -0.02 | 0.02  | 0.01      | -0.01 | 0.00  |
| 20          | 8  | 0.00     | 0.00  | 0.00  | -0.03    | 0.03  | 0.03  | 0.00      | -0.01 | 0.00  |
| 21          | 1  | 0.00     | 0.00  | 0.00  | -0.01    | 0.01  | 0.00  | -0.25     | 0.19  | 0.00  |
| 22          | 1  | 0.00     | 0.00  | 0.00  | 0.00     | -0.01 | 0.02  | -0.03     | 0.09  | -0.14 |
| 23          | 1  | 0.03     | 0.05  | -0.04 | 0.05     | 0.32  | -0.26 | 0.10      | -0.21 | 0.00  |
| 24          | 1  | 0.02     | 0.00  | 0.03  | 0.22     | -0.04 | 0.31  | -0.01     | 0.00  | -0.04 |
| 25          | 1  | 0.00     | -0.01 | 0.00  | -0.13    | -0.13 | -0.01 | 0.01      | 0.01  | 0.01  |
| 26          | 1  | -0.04    | -0.02 | -0.02 | -0.14    | -0.12 | -0.01 | 0.01      | -0.01 | 0.04  |
| 27          | 1  | 0.01     | -0.01 | -0.02 | 0.05     | -0.10 | -0.11 | -0.02     | 0.02  | 0.03  |
| 28          | 1  | 0.01     | 0.00  | 0.01  | 0.03     | -0.12 | 0.08  | -0.01     | 0.00  | -0.02 |
| 29          | 1  | 0.01     | 0.01  | 0.03  | -0.05    | 0.18  | 0.06  | 0.01      | 0.00  | 0.01  |
| 30          | 1  | -0.55    | -0.21 | 0.13  | -0.14    | 0.05  | 0.26  | 0.01      | 0.00  | -0.01 |
| 31          | 1  | 0.64     | -0.18 | -0.28 | -0.16    | -0.04 | 0.27  | -0.01     | 0.00  | 0.00  |

|             |    |           |       |       |           |       |       |           |       |       |
|-------------|----|-----------|-------|-------|-----------|-------|-------|-----------|-------|-------|
| 32          | 1  | -0.14     | -0.24 | 0.05  | 0.50      | 0.01  | -0.16 | -0.01     | 0.00  | 0.00  |
| 33          | 1  | 0.00      | -0.01 | 0.01  | 0.00      | 0.00  | 0.00  | -0.01     | 0.01  | 0.00  |
| 34          | 1  | 0.01      | -0.01 | 0.00  | 0.03      | -0.03 | -0.01 | 0.54      | -0.40 | -0.19 |
| 35          | 1  | 0.00      | 0.00  | 0.00  | -0.01     | 0.01  | 0.00  | -0.23     | 0.39  | -0.05 |
| 36          | 1  | 0.01      | 0.00  | -0.01 | 0.03      | -0.01 | -0.03 | 0.03      | 0.02  | -0.05 |
|             |    |           | 52    |       |           | 53    |       |           | 54    |       |
|             |    |           | A     |       |           | A     |       |           | A     |       |
| Frequencies | -- | 1051.3520 |       |       | 1062.9858 |       |       | 1088.9903 |       |       |
| Red. masses | -- | 2.1464    |       |       | 3.9898    |       |       | 2.7918    |       |       |
| Frc consts  | -- | 1.3978    |       |       | 2.6562    |       |       | 1.9506    |       |       |
| IR Inten    | -- | 15.5452   |       |       | 69.7777   |       |       | 378.2178  |       |       |
| Atom AN     |    | X         | Y     | Z     | X         | Y     | Z     | X         | Y     | Z     |
| 1           | 6  | -0.12     | -0.03 | -0.01 | -0.14     | 0.25  | 0.21  | -0.02     | 0.03  | -0.04 |
| 2           | 6  | 0.04      | -0.01 | 0.08  | -0.02     | 0.03  | -0.10 | -0.12     | -0.11 | 0.03  |
| 3           | 8  | 0.02      | 0.02  | -0.04 | 0.01      | 0.01  | 0.02  | 0.13      | 0.08  | 0.02  |
| 4           | 6  | -0.10     | 0.05  | 0.12  | -0.04     | -0.13 | 0.00  | -0.02     | 0.01  | -0.07 |
| 5           | 6  | 0.09      | 0.05  | -0.12 | -0.01     | -0.14 | -0.06 | -0.09     | 0.10  | -0.08 |
| 6           | 7  | -0.01     | 0.00  | 0.00  | 0.02      | 0.05  | -0.02 | 0.03      | -0.02 | 0.04  |
| 7           | 6  | 0.00      | 0.00  | 0.00  | 0.01      | 0.00  | 0.00  | -0.11     | 0.03  | 0.05  |
| 8           | 6  | 0.00      | 0.00  | 0.00  | -0.01     | 0.02  | -0.01 | -0.05     | 0.04  | -0.01 |
| 9           | 7  | -0.01     | 0.00  | 0.00  | 0.03      | 0.00  | -0.01 | 0.01      | -0.03 | 0.03  |
| 10          | 6  | 0.01      | 0.01  | 0.00  | -0.05     | -0.06 | 0.06  | 0.02      | 0.04  | -0.04 |
| 11          | 6  | 0.00      | 0.00  | 0.00  | 0.00      | 0.00  | 0.00  | 0.00      | 0.04  | -0.03 |
| 12          | 7  | 0.00      | 0.00  | 0.00  | -0.01     | 0.00  | 0.00  | -0.06     | -0.01 | 0.04  |
| 13          | 6  | 0.00      | 0.00  | 0.00  | -0.01     | 0.00  | 0.01  | 0.02      | -0.02 | 0.00  |
| 14          | 7  | 0.00      | 0.00  | 0.00  | 0.01      | -0.01 | 0.00  | 0.07      | -0.03 | -0.02 |
| 15          | 7  | 0.00      | 0.00  | 0.00  | 0.00      | 0.00  | 0.00  | 0.05      | 0.02  | -0.03 |
| 16          | 6  | 0.08      | -0.04 | -0.08 | 0.01      | 0.11  | 0.01  | -0.02     | 0.00  | 0.01  |
| 17          | 16 | -0.01     | -0.01 | 0.03  | 0.00      | 0.00  | 0.00  | 0.00      | 0.00  | -0.01 |
| 18          | 6  | -0.03     | 0.02  | -0.06 | 0.00      | 0.00  | -0.01 | 0.01      | -0.01 | 0.01  |
| 19          | 8  | 0.01      | 0.00  | 0.03  | -0.02     | -0.01 | -0.01 | 0.08      | -0.07 | 0.05  |
| 20          | 8  | 0.03      | -0.01 | -0.03 | 0.14      | -0.12 | -0.10 | 0.01      | -0.01 | -0.02 |
| 21          | 1  | 0.00      | 0.00  | 0.00  | -0.02     | 0.00  | 0.01  | 0.05      | -0.03 | 0.00  |
| 22          | 1  | 0.01      | -0.01 | -0.03 | -0.05     | -0.01 | 0.16  | -0.14     | 0.18  | -0.09 |
| 23          | 1  | 0.04      | -0.16 | 0.14  | 0.09      | -0.27 | -0.05 | 0.09      | -0.49 | 0.05  |
| 24          | 1  | -0.16     | -0.02 | -0.07 | 0.00      | 0.22  | 0.39  | 0.07      | -0.01 | 0.08  |
| 25          | 1  | 0.19      | 0.12  | -0.09 | 0.23      | 0.05  | 0.00  | -0.14     | 0.00  | -0.05 |
| 26          | 1  | -0.09     | 0.05  | 0.15  | -0.06     | -0.18 | 0.00  | 0.00      | -0.22 | 0.31  |
| 27          | 1  | -0.06     | 0.10  | 0.11  | 0.10      | -0.05 | -0.02 | -0.10     | 0.09  | 0.14  |
| 28          | 1  | 0.21      | -0.11 | 0.34  | 0.05      | 0.15  | 0.09  | -0.10     | -0.04 | -0.14 |
| 29          | 1  | -0.43     | -0.13 | -0.39 | -0.05     | 0.10  | -0.03 | 0.11      | 0.08  | 0.15  |
| 30          | 1  | -0.17     | 0.00  | 0.18  | 0.01      | 0.01  | 0.01  | 0.04      | 0.00  | -0.04 |
| 31          | 1  | 0.00      | -0.06 | 0.12  | -0.03     | 0.01  | 0.03  | -0.01     | 0.02  | -0.02 |
| 32          | 1  | 0.28      | -0.03 | -0.10 | 0.01      | 0.01  | -0.01 | -0.05     | 0.01  | 0.02  |
| 33          | 1  | 0.05      | -0.08 | 0.06  | -0.25     | 0.37  | -0.19 | 0.01      | 0.02  | 0.03  |
| 34          | 1  | -0.01     | 0.01  | 0.00  | 0.02      | -0.02 | -0.01 | -0.23     | 0.12  | 0.08  |
| 35          | 1  | 0.01      | -0.01 | 0.00  | 0.00      | 0.00  | 0.00  | 0.22      | -0.33 | 0.01  |
| 36          | 1  | -0.02     | 0.00  | 0.02  | 0.16      | 0.03  | -0.12 | -0.04     | -0.08 | 0.03  |
|             |    |           | 55    |       |           | 56    |       |           | 57    |       |
|             |    |           | A     |       |           | A     |       |           | A     |       |
| Frequencies | -- | 1097.5503 |       |       | 1116.6109 |       |       | 1124.0950 |       |       |
| Red. masses | -- | 1.8702    |       |       | 2.4993    |       |       | 3.3265    |       |       |
| Frc consts  | -- | 1.3273    |       |       | 1.8360    |       |       | 2.4765    |       |       |
| IR Inten    | -- | 3.3262    |       |       | 22.4947   |       |       | 17.9261   |       |       |
| Atom AN     |    | X         | Y     | Z     | X         | Y     | Z     | X         | Y     | Z     |
| 1           | 6  | -0.01     | 0.03  | 0.02  | -0.02     | 0.05  | 0.03  | -0.07     | 0.04  | 0.03  |
| 2           | 6  | 0.00      | -0.01 | -0.01 | -0.09     | -0.02 | -0.07 | 0.00      | -0.04 | 0.02  |

|    |    |       |       |       |       |       |       |       |       |       |
|----|----|-------|-------|-------|-------|-------|-------|-------|-------|-------|
| 3  | 8  | 0.02  | 0.01  | 0.00  | 0.02  | -0.01 | 0.01  | 0.00  | -0.01 | 0.01  |
| 4  | 6  | -0.02 | -0.03 | -0.01 | 0.07  | 0.18  | 0.00  | 0.08  | 0.20  | 0.00  |
| 5  | 6  | -0.01 | 0.00  | -0.03 | 0.00  | -0.11 | 0.11  | -0.16 | 0.08  | -0.08 |
| 6  | 7  | -0.04 | -0.02 | 0.04  | 0.04  | -0.01 | 0.01  | -0.07 | 0.06  | 0.00  |
| 7  | 6  | 0.01  | -0.01 | 0.01  | -0.06 | 0.02  | 0.02  | 0.11  | -0.04 | -0.03 |
| 8  | 6  | 0.04  | -0.07 | 0.02  | -0.04 | 0.02  | 0.00  | 0.09  | -0.06 | 0.00  |
| 9  | 7  | -0.13 | 0.05  | 0.02  | -0.04 | 0.00  | 0.03  | 0.04  | 0.02  | -0.05 |
| 10 | 6  | 0.16  | 0.01  | -0.08 | 0.07  | 0.00  | -0.04 | -0.08 | -0.02 | 0.06  |
| 11 | 6  | 0.01  | -0.02 | 0.02  | -0.01 | 0.02  | -0.01 | 0.02  | -0.04 | 0.01  |
| 12 | 7  | 0.02  | 0.00  | -0.01 | -0.03 | 0.00  | 0.01  | 0.04  | -0.01 | -0.02 |
| 13 | 6  | 0.02  | 0.01  | -0.02 | 0.01  | -0.01 | 0.00  | -0.02 | 0.02  | -0.01 |
| 14 | 7  | -0.04 | 0.03  | 0.00  | 0.03  | -0.02 | 0.00  | -0.06 | 0.04  | 0.00  |
| 15 | 7  | -0.02 | 0.02  | 0.00  | 0.03  | 0.00  | -0.02 | -0.06 | 0.00  | 0.03  |
| 16 | 6  | -0.01 | 0.03  | 0.01  | 0.03  | -0.14 | -0.05 | 0.00  | -0.13 | -0.02 |
| 17 | 16 | 0.00  | 0.00  | 0.00  | 0.00  | 0.00  | 0.01  | 0.00  | 0.00  | 0.00  |
| 18 | 6  | 0.00  | 0.00  | 0.00  | -0.01 | 0.01  | -0.01 | 0.00  | 0.00  | 0.01  |
| 19 | 8  | 0.01  | -0.01 | 0.01  | -0.05 | 0.04  | -0.04 | 0.09  | -0.09 | 0.06  |
| 20 | 8  | 0.02  | -0.01 | -0.01 | 0.02  | -0.02 | -0.01 | 0.04  | -0.03 | -0.04 |
| 21 | 1  | 0.06  | 0.00  | -0.03 | 0.00  | -0.01 | 0.01  | 0.02  | 0.01  | -0.02 |
| 22 | 1  | 0.55  | -0.42 | -0.12 | 0.04  | 0.02  | -0.07 | 0.13  | -0.20 | 0.17  |
| 23 | 1  | -0.05 | 0.07  | 0.00  | 0.06  | -0.11 | -0.14 | -0.08 | 0.01  | 0.05  |
| 24 | 1  | 0.01  | 0.05  | 0.09  | 0.05  | -0.02 | 0.06  | 0.06  | 0.07  | 0.30  |
| 25 | 1  | 0.02  | 0.03  | -0.02 | 0.01  | -0.20 | 0.21  | -0.39 | -0.19 | -0.06 |
| 26 | 1  | -0.04 | -0.12 | 0.06  | 0.21  | 0.62  | -0.24 | 0.09  | 0.20  | 0.05  |
| 27 | 1  | 0.01  | 0.00  | 0.00  | 0.01  | -0.04 | -0.02 | -0.08 | 0.07  | 0.12  |
| 28 | 1  | -0.01 | 0.03  | -0.01 | 0.09  | -0.13 | 0.09  | -0.13 | -0.28 | -0.18 |
| 29 | 1  | 0.02  | 0.04  | 0.03  | -0.09 | -0.18 | -0.14 | 0.07  | -0.07 | 0.07  |
| 30 | 1  | 0.01  | 0.00  | -0.01 | -0.05 | 0.00  | 0.04  | 0.00  | -0.01 | -0.02 |
| 31 | 1  | -0.01 | 0.00  | 0.00  | 0.02  | -0.02 | 0.01  | 0.01  | 0.01  | -0.03 |
| 32 | 1  | -0.01 | 0.00  | 0.00  | 0.05  | -0.01 | -0.02 | -0.03 | 0.00  | 0.01  |
| 33 | 1  | -0.02 | 0.04  | -0.02 | -0.12 | 0.16  | -0.10 | -0.03 | 0.11  | -0.03 |
| 34 | 1  | -0.05 | 0.04  | 0.01  | -0.12 | 0.07  | 0.04  | 0.15  | -0.09 | -0.07 |
| 35 | 1  | -0.02 | 0.01  | 0.00  | 0.13  | -0.18 | 0.01  | -0.21 | 0.28  | -0.01 |
| 36 | 1  | -0.49 | 0.04  | 0.38  | -0.13 | -0.03 | 0.10  | 0.11  | 0.07  | -0.09 |

58

59

60

A

A

A

Frequencies -- 1152.6428

1169.8433

1184.7867

Red. masses -- 3.9777

2.9082

1.5242

Frc consts -- 3.1137

2.3450

1.2606

IR Inten -- 63.3537

34.7943

10.8654

| Atom | AN | X     | Y     | Z     | X     | Y     | Z     | X     | Y     | Z     |
|------|----|-------|-------|-------|-------|-------|-------|-------|-------|-------|
| 1    | 6  | 0.04  | 0.01  | -0.06 | 0.02  | -0.04 | -0.04 | -0.07 | -0.01 | 0.00  |
| 2    | 6  | -0.17 | -0.13 | -0.03 | -0.06 | -0.02 | 0.00  | 0.01  | 0.00  | 0.01  |
| 3    | 8  | 0.16  | 0.10  | 0.02  | 0.04  | 0.03  | 0.02  | 0.00  | 0.00  | -0.02 |
| 4    | 6  | -0.05 | -0.04 | -0.08 | -0.02 | -0.01 | -0.02 | -0.05 | 0.07  | 0.05  |
| 5    | 6  | 0.10  | -0.08 | 0.09  | 0.04  | 0.00  | 0.02  | 0.14  | -0.05 | -0.01 |
| 6    | 7  | -0.10 | 0.02  | 0.09  | 0.02  | 0.21  | -0.14 | 0.00  | -0.01 | 0.01  |
| 7    | 6  | 0.05  | -0.06 | 0.02  | 0.04  | 0.04  | -0.06 | 0.00  | 0.00  | 0.00  |
| 8    | 6  | 0.12  | -0.09 | 0.00  | -0.05 | 0.02  | 0.02  | 0.00  | 0.00  | 0.00  |
| 9    | 7  | 0.09  | 0.02  | -0.07 | -0.07 | -0.01 | 0.04  | 0.00  | 0.00  | 0.00  |
| 10   | 6  | -0.13 | 0.07  | 0.02  | 0.04  | -0.17 | 0.10  | 0.00  | 0.01  | 0.00  |
| 11   | 6  | 0.03  | -0.04 | 0.01  | -0.02 | 0.01  | 0.00  | 0.00  | 0.00  | 0.00  |
| 12   | 7  | 0.03  | -0.03 | 0.00  | 0.00  | 0.03  | -0.02 | 0.00  | 0.00  | 0.00  |
| 13   | 6  | 0.03  | 0.05  | -0.05 | -0.07 | -0.06 | 0.07  | 0.00  | 0.00  | 0.00  |
| 14   | 7  | -0.08 | 0.06  | 0.00  | 0.05  | -0.03 | -0.01 | 0.00  | 0.00  | 0.00  |
| 15   | 7  | -0.07 | 0.02  | 0.02  | 0.02  | -0.01 | 0.00  | 0.00  | 0.00  | 0.00  |
| 16   | 6  | 0.00  | 0.01  | -0.01 | 0.00  | 0.00  | 0.00  | 0.01  | -0.03 | -0.02 |

|    |    |       |       |       |       |       |       |       |       |       |
|----|----|-------|-------|-------|-------|-------|-------|-------|-------|-------|
| 17 | 16 | 0.00  | 0.00  | 0.01  | 0.00  | 0.00  | 0.00  | 0.01  | 0.00  | -0.01 |
| 18 | 6  | -0.01 | 0.00  | -0.01 | 0.00  | 0.00  | 0.00  | 0.01  | 0.00  | 0.01  |
| 19 | 8  | -0.06 | 0.06  | -0.04 | -0.01 | 0.02  | -0.01 | -0.06 | 0.05  | -0.01 |
| 20 | 8  | -0.03 | 0.01  | 0.02  | -0.02 | 0.01  | 0.01  | 0.01  | 0.00  | -0.02 |
| 21 | 1  | 0.16  | 0.00  | -0.09 | -0.20 | -0.01 | 0.11  | 0.01  | 0.00  | -0.01 |
| 22 | 1  | 0.08  | -0.12 | 0.08  | 0.40  | -0.49 | 0.26  | -0.02 | 0.02  | -0.01 |
| 23 | 1  | -0.20 | -0.49 | 0.13  | -0.04 | -0.39 | 0.14  | 0.04  | 0.03  | -0.03 |
| 24 | 1  | 0.03  | -0.10 | -0.23 | 0.02  | -0.12 | -0.14 | -0.01 | 0.03  | 0.15  |
| 25 | 1  | 0.26  | 0.00  | 0.19  | -0.05 | -0.06 | -0.01 | 0.04  | -0.34 | 0.15  |
| 26 | 1  | 0.10  | 0.10  | 0.14  | 0.01  | -0.01 | 0.05  | -0.18 | -0.26 | 0.15  |
| 27 | 1  | -0.03 | 0.02  | 0.03  | -0.06 | 0.06  | 0.08  | -0.07 | 0.13  | 0.13  |
| 28 | 1  | 0.15  | 0.15  | 0.18  | 0.01  | 0.01  | 0.01  | -0.27 | -0.37 | -0.32 |
| 29 | 1  | -0.05 | 0.00  | -0.05 | 0.03  | 0.04  | 0.04  | 0.24  | 0.31  | 0.38  |
| 30 | 1  | -0.02 | 0.01  | 0.02  | 0.01  | 0.00  | 0.00  | 0.03  | -0.01 | -0.04 |
| 31 | 1  | 0.01  | -0.01 | 0.02  | 0.00  | 0.00  | 0.00  | 0.00  | 0.01  | -0.02 |
| 32 | 1  | 0.04  | 0.00  | -0.02 | 0.01  | 0.00  | 0.00  | -0.04 | 0.00  | 0.02  |
| 33 | 1  | -0.03 | -0.01 | 0.00  | 0.10  | -0.16 | 0.08  | 0.06  | -0.11 | 0.04  |
| 34 | 1  | 0.08  | -0.06 | -0.05 | 0.00  | 0.01  | 0.01  | 0.00  | 0.00  | 0.00  |
| 35 | 1  | -0.19 | 0.23  | -0.02 | 0.06  | -0.06 | 0.01  | 0.00  | 0.00  | 0.00  |
| 36 | 1  | 0.05  | 0.01  | -0.04 | 0.14  | 0.09  | -0.09 | -0.01 | 0.00  | 0.00  |

|             |    | 61        |       |       | 62        |       |       | 63        |       |       |
|-------------|----|-----------|-------|-------|-----------|-------|-------|-----------|-------|-------|
|             |    | A         |       |       | A         |       |       | A         |       |       |
| Frequencies | -- | 1225.4535 |       |       | 1234.0906 |       |       | 1247.6368 |       |       |
| Red. masses | -- | 1.3443    |       |       | 1.2102    |       |       | 2.0868    |       |       |
| Frc consts  | -- | 1.1895    |       |       | 1.0859    |       |       | 1.9138    |       |       |
| IR Inten    | -- | 7.5985    |       |       | 33.7292   |       |       | 2.8557    |       |       |
| Atom        | AN | X         | Y     | Z     | X         | Y     | Z     | X         | Y     | Z     |
| 1           | 6  | 0.00      | -0.03 | 0.01  | 0.05      | -0.01 | 0.01  | 0.01      | -0.01 | -0.01 |
| 2           | 6  | -0.01     | 0.10  | -0.03 | -0.02     | 0.02  | -0.01 | -0.02     | 0.03  | -0.01 |
| 3           | 8  | -0.04     | -0.03 | -0.01 | -0.01     | -0.01 | 0.00  | 0.00      | -0.01 | 0.00  |
| 4           | 6  | 0.01      | -0.01 | 0.02  | -0.02     | 0.06  | 0.05  | 0.00      | 0.01  | 0.01  |
| 5           | 6  | -0.01     | 0.01  | 0.00  | -0.01     | 0.00  | -0.05 | 0.00      | 0.00  | -0.01 |
| 6           | 7  | 0.00      | 0.03  | 0.03  | 0.00      | 0.01  | -0.01 | -0.02     | 0.01  | 0.01  |
| 7           | 6  | -0.03     | -0.02 | 0.04  | 0.00      | 0.00  | 0.00  | -0.04     | 0.02  | 0.01  |
| 8           | 6  | 0.01      | -0.04 | 0.02  | -0.01     | -0.01 | 0.02  | 0.10      | 0.10  | -0.14 |
| 9           | 7  | 0.02      | 0.01  | -0.03 | 0.00      | 0.00  | -0.01 | 0.01      | -0.05 | 0.04  |
| 10          | 6  | -0.03     | 0.02  | 0.00  | -0.01     | 0.00  | 0.00  | 0.01      | -0.04 | 0.04  |
| 11          | 6  | -0.01     | -0.01 | 0.01  | -0.01     | 0.00  | 0.01  | 0.09      | 0.01  | -0.06 |
| 12          | 7  | 0.01      | -0.01 | 0.00  | 0.01      | 0.00  | 0.00  | -0.08     | 0.01  | 0.03  |
| 13          | 6  | 0.03      | 0.03  | -0.03 | 0.00      | 0.00  | 0.00  | -0.03     | -0.03 | 0.04  |
| 14          | 7  | -0.03     | 0.01  | 0.01  | -0.01     | 0.00  | 0.00  | 0.08      | -0.01 | -0.04 |
| 15          | 7  | 0.00      | 0.01  | -0.01 | 0.01      | 0.00  | -0.01 | -0.06     | -0.03 | 0.06  |
| 16          | 6  | 0.00      | 0.01  | 0.01  | 0.02      | -0.02 | -0.01 | 0.00      | 0.00  | 0.00  |
| 17          | 16 | 0.00      | 0.00  | 0.00  | 0.00      | 0.00  | 0.00  | 0.00      | 0.00  | 0.00  |
| 18          | 6  | 0.00      | 0.00  | 0.00  | 0.01      | 0.00  | 0.00  | 0.00      | 0.00  | 0.00  |
| 19          | 8  | 0.01      | 0.01  | 0.00  | 0.00      | -0.04 | 0.01  | 0.00      | 0.00  | 0.00  |
| 20          | 8  | -0.01     | 0.00  | 0.01  | -0.01     | 0.01  | 0.04  | 0.00      | 0.00  | 0.01  |
| 21          | 1  | 0.08      | 0.01  | -0.05 | 0.00      | 0.00  | 0.00  | 0.02      | -0.05 | 0.03  |
| 22          | 1  | 0.13      | -0.12 | 0.05  | 0.06      | -0.06 | 0.02  | -0.13     | 0.08  | 0.01  |
| 23          | 1  | 0.70      | -0.47 | -0.27 | 0.02      | -0.08 | 0.01  | 0.20      | -0.19 | -0.06 |
| 24          | 1  | 0.10      | -0.18 | -0.01 | -0.10     | -0.06 | -0.32 | 0.01      | -0.08 | -0.08 |
| 25          | 1  | -0.11     | 0.02  | -0.10 | 0.40      | 0.29  | 0.09  | 0.03      | 0.06  | -0.02 |
| 26          | 1  | -0.04     | 0.01  | -0.15 | -0.06     | -0.05 | 0.12  | -0.02     | 0.00  | -0.02 |
| 27          | 1  | -0.02     | 0.01  | 0.02  | 0.20      | -0.27 | -0.31 | 0.03      | -0.05 | -0.05 |
| 28          | 1  | -0.05     | -0.04 | -0.06 | -0.15     | -0.22 | -0.18 | -0.04     | -0.05 | -0.05 |
| 29          | 1  | -0.02     | -0.02 | -0.03 | 0.03      | 0.09  | 0.10  | 0.01      | 0.02  | 0.02  |
| 30          | 1  | 0.01      | 0.00  | 0.00  | -0.01     | -0.01 | 0.00  | 0.00      | 0.00  | 0.00  |

|             |    |           |       |       |           |       |       |           |       |       |
|-------------|----|-----------|-------|-------|-----------|-------|-------|-----------|-------|-------|
| 31          | 1  | 0.00      | 0.00  | 0.00  | -0.02     | 0.01  | 0.00  | 0.00      | 0.00  | 0.00  |
| 32          | 1  | 0.00      | 0.00  | 0.00  | -0.04     | 0.00  | 0.01  | -0.01     | 0.00  | 0.00  |
| 33          | 1  | 0.10      | -0.14 | 0.07  | -0.25     | 0.37  | -0.19 | -0.01     | 0.01  | -0.01 |
| 34          | 1  | -0.07     | 0.04  | 0.02  | -0.03     | 0.02  | 0.01  | 0.28      | -0.19 | -0.11 |
| 35          | 1  | 0.04      | -0.07 | 0.00  | 0.03      | -0.04 | 0.00  | -0.32     | 0.42  | -0.04 |
| 36          | 1  | 0.02      | 0.03  | -0.01 | 0.05      | 0.02  | -0.04 | -0.43     | -0.20 | 0.37  |
|             |    |           | 64    |       |           | 65    |       |           | 66    |       |
|             |    |           | A     |       |           | A     |       |           | A     |       |
| Frequencies | -- | 1268.0659 |       |       | 1271.3934 |       |       | 1304.6161 |       |       |
| Red. masses | -- | 1.2069    |       |       | 1.2729    |       |       | 1.4161    |       |       |
| Frc consts  | -- | 1.1434    |       |       | 1.2123    |       |       | 1.4200    |       |       |
| IR Inten    | -- | 26.5439   |       |       | 5.8060    |       |       | 22.6578   |       |       |
| Atom AN     |    | X         | Y     | Z     | X         | Y     | Z     | X         | Y     | Z     |
| 1           | 6  | 0.01      | -0.01 | -0.09 | -0.01     | -0.01 | 0.01  | 0.00      | 0.00  | 0.01  |
| 2           | 6  | 0.04      | -0.01 | 0.05  | 0.00      | 0.02  | -0.01 | -0.03     | -0.03 | 0.03  |
| 3           | 8  | -0.02     | 0.00  | -0.02 | -0.02     | 0.00  | 0.00  | -0.04     | -0.01 | -0.02 |
| 4           | 6  | 0.01      | -0.01 | 0.00  | 0.01      | -0.02 | 0.04  | 0.06      | 0.03  | -0.06 |
| 5           | 6  | -0.02     | 0.01  | 0.02  | -0.01     | 0.00  | -0.01 | 0.04      | 0.02  | -0.01 |
| 6           | 7  | -0.01     | 0.01  | 0.00  | 0.00      | 0.00  | 0.00  | 0.01      | -0.01 | 0.03  |
| 7           | 6  | 0.01      | 0.00  | -0.01 | 0.00      | 0.00  | 0.00  | 0.02      | 0.01  | -0.02 |
| 8           | 6  | 0.00      | 0.00  | 0.00  | 0.00      | 0.00  | 0.00  | -0.02     | -0.01 | 0.02  |
| 9           | 7  | 0.00      | 0.00  | 0.00  | 0.00      | 0.00  | 0.00  | 0.02      | -0.02 | 0.00  |
| 10          | 6  | 0.00      | 0.00  | 0.00  | 0.00      | 0.00  | 0.00  | -0.05     | 0.05  | -0.01 |
| 11          | 6  | 0.00      | 0.00  | 0.00  | 0.00      | 0.00  | 0.00  | -0.01     | 0.03  | -0.02 |
| 12          | 7  | 0.00      | 0.00  | 0.00  | 0.00      | 0.00  | 0.00  | -0.01     | 0.02  | -0.01 |
| 13          | 6  | -0.01     | -0.01 | 0.01  | 0.00      | 0.00  | 0.00  | -0.03     | -0.04 | 0.04  |
| 14          | 7  | 0.01      | 0.00  | -0.01 | 0.00      | 0.00  | 0.00  | 0.04      | 0.02  | -0.04 |
| 15          | 7  | 0.00      | 0.00  | 0.00  | 0.00      | 0.00  | 0.00  | 0.01      | -0.02 | 0.01  |
| 16          | 6  | -0.02     | -0.01 | -0.01 | -0.05     | -0.07 | -0.11 | -0.02     | -0.01 | 0.02  |
| 17          | 16 | 0.00      | 0.00  | 0.00  | 0.00      | 0.01  | 0.00  | 0.00      | 0.00  | 0.00  |
| 18          | 6  | 0.00      | 0.00  | 0.00  | -0.01     | 0.00  | 0.00  | 0.00      | 0.00  | 0.00  |
| 19          | 8  | -0.01     | -0.02 | 0.00  | 0.01      | 0.00  | 0.00  | -0.02     | 0.00  | 0.00  |
| 20          | 8  | -0.02     | 0.00  | -0.01 | 0.01      | 0.00  | 0.01  | 0.01      | 0.00  | 0.01  |
| 21          | 1  | -0.02     | 0.00  | 0.01  | 0.01      | 0.00  | -0.01 | -0.07     | -0.03 | 0.05  |
| 22          | 1  | 0.02      | -0.02 | 0.01  | 0.00      | 0.00  | 0.00  | 0.21      | -0.19 | 0.03  |
| 23          | 1  | 0.21      | 0.07  | -0.09 | 0.03      | -0.07 | 0.01  | 0.32      | 0.17  | -0.28 |
| 24          | 1  | 0.37      | -0.19 | 0.36  | -0.07     | 0.06  | -0.03 | -0.22     | 0.21  | -0.11 |
| 25          | 1  | 0.35      | 0.09  | 0.29  | -0.05     | 0.11  | -0.15 | -0.04     | -0.33 | 0.20  |
| 26          | 1  | 0.01      | -0.03 | 0.02  | 0.14      | 0.13  | 0.21  | 0.08      | -0.26 | 0.43  |
| 27          | 1  | -0.19     | 0.24  | 0.26  | 0.06      | -0.08 | -0.09 | 0.10      | -0.11 | -0.13 |
| 28          | 1  | 0.10      | 0.12  | 0.13  | 0.30      | 0.20  | 0.45  | 0.11      | 0.17  | 0.12  |
| 29          | 1  | 0.05      | 0.03  | 0.05  | 0.38      | 0.35  | 0.46  | -0.05     | -0.16 | -0.13 |
| 30          | 1  | -0.02     | 0.00  | 0.01  | 0.03      | 0.02  | -0.03 | 0.00      | 0.00  | 0.01  |
| 31          | 1  | 0.00      | 0.00  | 0.01  | 0.06      | -0.02 | -0.04 | 0.00      | 0.00  | 0.01  |
| 32          | 1  | -0.01     | 0.00  | 0.00  | 0.08      | -0.01 | -0.02 | 0.00      | 0.00  | 0.00  |
| 33          | 1  | -0.24     | 0.33  | -0.14 | 0.05      | -0.05 | 0.02  | -0.03     | 0.05  | -0.04 |
| 34          | 1  | 0.01      | 0.00  | 0.00  | 0.00      | 0.00  | 0.00  | 0.08      | -0.05 | -0.02 |
| 35          | 1  | -0.01     | 0.01  | 0.00  | 0.00      | 0.00  | 0.00  | -0.01     | 0.02  | 0.01  |
| 36          | 1  | 0.01      | 0.00  | -0.01 | -0.01     | 0.00  | 0.00  | 0.03      | -0.03 | -0.02 |
|             |    |           | 67    |       |           | 68    |       |           | 69    |       |
|             |    |           | A     |       |           | A     |       |           | A     |       |
| Frequencies | -- | 1313.0083 |       |       | 1346.6109 |       |       | 1349.6792 |       |       |
| Red. masses | -- | 2.2830    |       |       | 2.0075    |       |       | 1.8611    |       |       |
| Frc consts  | -- | 2.3190    |       |       | 2.1449    |       |       | 1.9975    |       |       |
| IR Inten    | -- | 28.0563   |       |       | 35.8539   |       |       | 15.0273   |       |       |
| Atom AN     |    | X         | Y     | Z     | X         | Y     | Z     | X         | Y     | Z     |
| 1           | 6  | 0.00      | -0.01 | -0.02 | 0.00      | -0.08 | -0.06 | 0.00      | -0.08 | -0.06 |

|    |    |       |       |       |       |       |       |       |       |       |
|----|----|-------|-------|-------|-------|-------|-------|-------|-------|-------|
| 2  | 6  | 0.01  | 0.00  | -0.01 | -0.01 | -0.02 | 0.04  | -0.04 | 0.00  | 0.02  |
| 3  | 8  | 0.03  | 0.01  | 0.00  | 0.01  | 0.01  | -0.01 | 0.02  | 0.01  | -0.01 |
| 4  | 6  | -0.05 | -0.04 | 0.06  | -0.01 | -0.03 | 0.01  | -0.01 | -0.03 | 0.01  |
| 5  | 6  | -0.03 | -0.02 | 0.02  | -0.02 | 0.01  | 0.03  | -0.02 | 0.02  | 0.02  |
| 6  | 7  | 0.02  | -0.08 | 0.06  | 0.05  | 0.02  | -0.05 | -0.05 | 0.03  | 0.02  |
| 7  | 6  | 0.05  | 0.00  | -0.02 | -0.07 | 0.08  | -0.02 | 0.04  | -0.07 | 0.02  |
| 8  | 6  | -0.07 | -0.01 | 0.04  | 0.05  | 0.02  | -0.05 | -0.02 | 0.00  | 0.02  |
| 9  | 7  | 0.04  | -0.04 | 0.00  | 0.05  | -0.02 | -0.02 | -0.06 | 0.02  | 0.03  |
| 10 | 6  | -0.10 | 0.13  | -0.05 | -0.08 | 0.01  | 0.05  | 0.09  | -0.05 | -0.02 |
| 11 | 6  | -0.04 | 0.08  | -0.04 | -0.03 | -0.05 | 0.05  | 0.06  | 0.01  | -0.03 |
| 12 | 7  | -0.01 | 0.02  | -0.01 | -0.04 | 0.06  | -0.02 | 0.05  | -0.08 | 0.03  |
| 13 | 6  | -0.07 | -0.07 | 0.09  | 0.11  | -0.02 | -0.04 | -0.09 | 0.06  | 0.01  |
| 14 | 7  | 0.09  | 0.05  | -0.08 | -0.05 | -0.07 | 0.07  | 0.03  | 0.04  | -0.04 |
| 15 | 7  | 0.03  | -0.04 | 0.02  | 0.01  | 0.01  | -0.01 | -0.02 | 0.01  | 0.00  |
| 16 | 6  | 0.02  | 0.01  | -0.02 | 0.01  | 0.01  | 0.00  | 0.01  | 0.01  | 0.00  |
| 17 | 16 | 0.00  | 0.00  | 0.00  | 0.00  | 0.00  | 0.00  | 0.00  | 0.00  | 0.00  |
| 18 | 6  | 0.00  | 0.00  | 0.00  | 0.00  | 0.00  | 0.00  | 0.00  | 0.00  | 0.00  |
| 19 | 8  | 0.01  | 0.00  | 0.00  | 0.00  | 0.00  | 0.00  | 0.00  | 0.00  | 0.00  |
| 20 | 8  | 0.00  | 0.00  | -0.01 | 0.03  | 0.01  | -0.01 | 0.02  | 0.01  | 0.00  |
| 21 | 1  | -0.11 | -0.06 | 0.10  | 0.08  | -0.01 | -0.03 | -0.10 | 0.06  | 0.00  |
| 22 | 1  | 0.40  | -0.35 | 0.03  | 0.13  | -0.20 | 0.10  | -0.21 | 0.24  | -0.08 |
| 23 | 1  | -0.08 | -0.05 | 0.08  | 0.04  | 0.03  | -0.02 | 0.20  | -0.15 | -0.08 |
| 24 | 1  | 0.02  | 0.11  | 0.19  | -0.31 | 0.66  | 0.37  | -0.28 | 0.60  | 0.35  |
| 25 | 1  | 0.02  | 0.29  | -0.18 | 0.09  | 0.05  | 0.10  | 0.10  | 0.02  | 0.13  |
| 26 | 1  | -0.06 | 0.28  | -0.42 | 0.02  | 0.13  | -0.13 | 0.01  | 0.11  | -0.13 |
| 27 | 1  | -0.03 | 0.04  | 0.04  | 0.06  | -0.06 | -0.07 | 0.10  | -0.11 | -0.13 |
| 28 | 1  | -0.10 | -0.16 | -0.11 | -0.03 | -0.03 | -0.04 | -0.03 | -0.03 | -0.05 |
| 29 | 1  | 0.04  | 0.15  | 0.10  | -0.01 | 0.02  | 0.00  | -0.02 | 0.02  | 0.00  |
| 30 | 1  | 0.01  | 0.00  | -0.01 | 0.00  | 0.00  | 0.00  | 0.00  | 0.00  | 0.00  |
| 31 | 1  | 0.00  | 0.00  | -0.01 | 0.00  | 0.00  | 0.00  | 0.00  | 0.00  | 0.00  |
| 32 | 1  | 0.01  | 0.00  | 0.00  | 0.00  | 0.00  | 0.00  | 0.00  | 0.00  | 0.00  |
| 33 | 1  | 0.04  | -0.06 | 0.04  | -0.02 | 0.02  | -0.01 | 0.00  | -0.01 | 0.01  |
| 34 | 1  | 0.17  | -0.10 | -0.04 | -0.08 | 0.04  | 0.02  | -0.01 | 0.00  | -0.01 |
| 35 | 1  | 0.00  | 0.03  | 0.02  | 0.04  | -0.08 | -0.01 | -0.05 | 0.08  | -0.01 |
| 36 | 1  | 0.05  | -0.07 | -0.04 | -0.19 | -0.08 | 0.18  | 0.17  | 0.08  | -0.16 |

|             |    | 70        |       |       | 71        |       |       | 72        |       |       |
|-------------|----|-----------|-------|-------|-----------|-------|-------|-----------|-------|-------|
|             |    | A         |       |       | A         |       |       | A         |       |       |
| Frequencies | -- | 1359.2698 |       |       | 1362.7969 |       |       | 1371.1734 |       |       |
| Red. masses | -- | 1.4148    |       |       | 1.7253    |       |       | 2.6737    |       |       |
| Frc consts  | -- | 1.5401    |       |       | 1.8879    |       |       | 2.9618    |       |       |
| IR Inten    | -- | 31.7757   |       |       | 1.1277    |       |       | 22.1890   |       |       |
| Atom        | AN | X         | Y     | Z     | X         | Y     | Z     | X         | Y     | Z     |
| 1           | 6  | 0.03      | 0.04  | 0.00  | -0.01     | -0.02 | -0.01 | 0.02      | -0.01 | -0.01 |
| 2           | 6  | -0.03     | -0.05 | 0.04  | 0.00      | 0.02  | -0.01 | 0.03      | 0.01  | -0.01 |
| 3           | 8  | -0.02     | 0.01  | -0.02 | 0.01      | 0.00  | 0.01  | -0.04     | -0.01 | 0.01  |
| 4           | 6  | -0.03     | 0.01  | -0.01 | 0.01      | 0.00  | 0.01  | 0.00      | 0.03  | -0.04 |
| 5           | 6  | -0.03     | -0.09 | 0.04  | 0.01      | 0.03  | -0.01 | -0.02     | -0.05 | 0.01  |
| 6           | 7  | -0.02     | 0.01  | 0.00  | -0.02     | 0.01  | -0.01 | 0.07      | 0.03  | -0.06 |
| 7           | 6  | 0.00      | 0.01  | -0.01 | 0.00      | -0.04 | 0.03  | -0.01     | -0.11 | 0.08  |
| 8           | 6  | 0.03      | -0.04 | 0.02  | 0.02      | -0.05 | 0.04  | -0.08     | 0.13  | -0.06 |
| 9           | 7  | -0.02     | 0.02  | 0.00  | -0.05     | 0.02  | 0.01  | -0.01     | -0.06 | 0.04  |
| 10          | 6  | 0.03      | -0.03 | 0.00  | 0.05      | -0.03 | -0.01 | -0.04     | 0.04  | -0.01 |
| 11          | 6  | -0.01     | 0.00  | 0.00  | -0.06     | 0.11  | -0.06 | 0.01      | 0.10  | -0.08 |
| 12          | 7  | -0.03     | 0.05  | -0.02 | -0.07     | 0.09  | -0.03 | 0.05      | -0.12 | 0.06  |
| 13          | 6  | 0.02      | -0.04 | 0.02  | 0.06      | -0.08 | 0.03  | -0.03     | 0.11  | -0.07 |
| 14          | 7  | 0.01      | 0.01  | -0.01 | -0.03     | 0.01  | 0.01  | -0.07     | -0.03 | 0.06  |
| 15          | 7  | 0.00      | 0.00  | 0.00  | 0.02      | -0.05 | 0.03  | 0.02      | -0.02 | 0.01  |



|    |    |       |       |       |       |       |       |       |       |       |
|----|----|-------|-------|-------|-------|-------|-------|-------|-------|-------|
| 16 | 6  | 0.04  | 0.00  | 0.01  | -0.01 | 0.00  | 0.00  | 0.01  | -0.01 | 0.01  |
| 17 | 16 | 0.00  | 0.00  | 0.00  | 0.00  | 0.00  | 0.00  | 0.00  | 0.00  | 0.00  |
| 18 | 6  | 0.00  | 0.00  | 0.00  | 0.00  | 0.00  | 0.00  | 0.01  | 0.00  | -0.01 |
| 19 | 8  | 0.01  | 0.02  | -0.01 | 0.00  | 0.00  | 0.00  | 0.00  | 0.01  | 0.00  |
| 20 | 8  | 0.00  | 0.00  | -0.01 | 0.00  | 0.00  | 0.00  | 0.00  | 0.00  | -0.01 |
| 21 | 1  | 0.06  | -0.05 | 0.01  | 0.74  | -0.32 | -0.14 | 0.50  | -0.08 | -0.21 |
| 22 | 1  | -0.11 | 0.10  | -0.02 | -0.10 | 0.11  | -0.05 | 0.30  | -0.28 | 0.05  |
| 23 | 1  | 0.23  | 0.24  | -0.25 | -0.04 | -0.09 | 0.07  | -0.13 | 0.05  | 0.07  |
| 24 | 1  | 0.01  | 0.08  | 0.00  | -0.03 | 0.04  | 0.05  | 0.02  | 0.07  | 0.10  |
| 25 | 1  | 0.05  | 0.46  | -0.34 | 0.00  | -0.13 | 0.11  | 0.12  | 0.21  | -0.07 |
| 26 | 1  | 0.20  | 0.18  | 0.45  | -0.06 | -0.04 | -0.15 | 0.12  | -0.01 | 0.40  |
| 27 | 1  | -0.08 | 0.11  | 0.12  | 0.04  | -0.05 | -0.05 | -0.06 | 0.08  | 0.08  |
| 28 | 1  | -0.10 | -0.12 | -0.18 | 0.03  | 0.03  | 0.05  | -0.02 | -0.01 | -0.06 |
| 29 | 1  | -0.09 | 0.06  | -0.01 | 0.03  | -0.02 | 0.00  | -0.07 | -0.02 | -0.04 |
| 30 | 1  | 0.00  | 0.00  | 0.01  | 0.01  | 0.00  | -0.01 | -0.06 | -0.02 | 0.06  |
| 31 | 1  | -0.01 | 0.00  | 0.01  | 0.01  | 0.00  | -0.01 | -0.06 | 0.02  | 0.05  |
| 32 | 1  | -0.01 | 0.00  | 0.00  | 0.01  | 0.00  | 0.00  | -0.09 | 0.00  | 0.01  |
| 33 | 1  | 0.11  | -0.15 | 0.08  | -0.03 | 0.04  | -0.02 | 0.08  | -0.11 | 0.05  |
| 34 | 1  | 0.02  | -0.01 | -0.01 | 0.25  | -0.14 | -0.06 | 0.12  | -0.07 | -0.04 |
| 35 | 1  | 0.00  | 0.00  | 0.01  | -0.01 | 0.03  | 0.04  | -0.03 | 0.06  | -0.01 |
| 36 | 1  | 0.08  | 0.06  | -0.07 | 0.18  | 0.12  | -0.15 | 0.00  | -0.10 | 0.01  |

73

74

75

|             |    | A         |       |       | A         |       |       | A         |       |       |
|-------------|----|-----------|-------|-------|-----------|-------|-------|-----------|-------|-------|
| Frequencies | -- | 1374.2480 |       |       | 1383.0064 |       |       | 1403.0507 |       |       |
| Red. masses | -- | 1.1572    |       |       | 1.7043    |       |       | 1.3678    |       |       |
| Frc consts  | -- | 1.2876    |       |       | 1.9206    |       |       | 1.5864    |       |       |
| IR Inten    | -- | 5.9035    |       |       | 43.1004   |       |       | 3.0457    |       |       |
| Atom        | AN | X         | Y     | Z     | X         | Y     | Z     | X         | Y     | Z     |
| 1           | 6  | 0.00      | 0.01  | 0.00  | 0.00      | -0.04 | -0.03 | 0.00      | -0.01 | 0.01  |
| 2           | 6  | 0.01      | 0.00  | 0.00  | 0.05      | 0.10  | -0.08 | 0.04      | 0.04  | -0.02 |
| 3           | 8  | 0.00      | 0.00  | 0.00  | -0.03     | -0.03 | 0.04  | -0.03     | 0.00  | 0.00  |
| 4           | 6  | 0.00      | 0.00  | -0.01 | 0.04      | 0.08  | -0.06 | -0.05     | -0.11 | -0.03 |
| 5           | 6  | -0.01     | -0.01 | -0.01 | -0.06     | -0.07 | -0.02 | -0.01     | 0.06  | -0.04 |
| 6           | 7  | 0.00      | 0.00  | 0.00  | -0.02     | -0.03 | 0.03  | 0.00      | -0.01 | 0.00  |
| 7           | 6  | 0.00      | 0.00  | 0.00  | 0.01      | 0.02  | -0.02 | 0.00      | 0.00  | 0.00  |
| 8           | 6  | 0.00      | 0.01  | 0.00  | 0.00      | -0.03 | 0.02  | -0.01     | -0.01 | 0.01  |
| 9           | 7  | 0.00      | 0.00  | 0.00  | 0.02      | 0.02  | -0.02 | 0.02      | 0.01  | -0.02 |
| 10          | 6  | 0.00      | 0.00  | 0.00  | 0.00      | 0.00  | 0.00  | 0.00      | -0.01 | 0.01  |
| 11          | 6  | 0.00      | 0.00  | 0.00  | -0.02     | -0.01 | 0.02  | -0.02     | 0.01  | 0.00  |
| 12          | 7  | 0.00      | -0.01 | 0.00  | -0.01     | 0.03  | -0.02 | 0.00      | 0.00  | 0.00  |
| 13          | 6  | 0.00      | 0.01  | 0.00  | 0.00      | -0.03 | 0.02  | 0.00      | -0.01 | 0.01  |
| 14          | 7  | 0.00      | 0.00  | 0.00  | 0.02      | 0.02  | -0.02 | 0.00      | 0.01  | -0.01 |
| 15          | 7  | 0.00      | 0.00  | 0.00  | 0.01      | 0.00  | 0.00  | 0.01      | 0.00  | 0.00  |
| 16          | 6  | 0.01      | 0.01  | 0.01  | -0.01     | -0.02 | 0.01  | 0.05      | 0.02  | 0.01  |
| 17          | 16 | -0.01     | 0.00  | 0.00  | 0.00      | 0.00  | 0.00  | 0.00      | 0.00  | 0.00  |
| 18          | 6  | -0.09     | 0.00  | 0.06  | 0.00      | 0.00  | 0.00  | 0.01      | 0.00  | 0.00  |
| 19          | 8  | 0.00      | 0.01  | 0.00  | 0.00      | 0.04  | 0.01  | 0.00      | 0.00  | 0.01  |
| 20          | 8  | 0.00      | 0.00  | 0.00  | 0.00      | 0.01  | 0.01  | 0.00      | 0.00  | 0.00  |
| 21          | 1  | 0.02      | 0.00  | -0.01 | -0.13     | 0.01  | 0.06  | -0.02     | 0.00  | 0.01  |
| 22          | 1  | 0.02      | -0.02 | 0.00  | -0.07     | 0.07  | -0.02 | -0.04     | 0.03  | 0.00  |
| 23          | 1  | -0.01     | 0.01  | 0.01  | -0.23     | -0.36 | 0.29  | -0.05     | -0.09 | 0.10  |
| 24          | 1  | 0.03      | -0.02 | 0.01  | 0.09      | 0.08  | 0.30  | 0.04      | -0.09 | -0.02 |
| 25          | 1  | 0.08      | -0.01 | 0.07  | 0.34      | 0.15  | 0.15  | 0.03      | -0.33 | 0.31  |
| 26          | 1  | 0.02      | 0.02  | 0.05  | 0.00      | -0.27 | 0.32  | 0.41      | 0.60  | 0.35  |
| 27          | 1  | 0.00      | -0.01 | -0.01 | 0.03      | -0.04 | -0.04 | 0.00      | -0.02 | -0.01 |
| 28          | 1  | -0.05     | -0.07 | -0.04 | 0.04      | 0.10  | 0.01  | -0.09     | -0.15 | -0.14 |
| 29          | 1  | -0.01     | -0.06 | -0.05 | -0.07     | -0.10 | -0.08 | -0.04     | 0.10  | 0.02  |

|             |    |           |       |       |           |       |       |           |       |       |
|-------------|----|-----------|-------|-------|-----------|-------|-------|-----------|-------|-------|
| 30          | 1  | 0.39      | 0.14  | -0.37 | -0.02     | 0.00  | 0.03  | -0.04     | -0.01 | 0.04  |
| 31          | 1  | 0.39      | -0.15 | -0.37 | -0.02     | 0.00  | 0.03  | -0.04     | 0.02  | 0.01  |
| 32          | 1  | 0.58      | 0.01  | -0.06 | -0.04     | 0.00  | 0.00  | -0.05     | 0.03  | 0.01  |
| 33          | 1  | 0.01      | -0.02 | 0.02  | 0.21      | -0.28 | 0.14  | 0.00      | 0.01  | 0.00  |
| 34          | 1  | 0.00      | 0.00  | 0.00  | -0.01     | 0.01  | 0.01  | 0.01      | 0.00  | 0.00  |
| 35          | 1  | 0.00      | 0.00  | 0.00  | 0.03      | -0.03 | 0.01  | 0.02      | -0.02 | 0.01  |
| 36          | 1  | 0.00      | -0.01 | 0.00  | -0.09     | 0.00  | 0.07  | -0.10     | -0.01 | 0.08  |
|             |    |           | 76    |       |           | 77    |       |           | 78    |       |
|             |    |           | A     |       |           | A     |       |           | A     |       |
| Frequencies | -- | 1413.0477 |       |       | 1431.0266 |       |       | 1440.4169 |       |       |
| Red. masses | -- | 2.1597    |       |       | 1.6863    |       |       | 1.6625    |       |       |
| Frc consts  | -- | 2.5407    |       |       | 2.0347    |       |       | 2.0322    |       |       |
| IR Inten    | -- | 175.1565  |       |       | 63.5984   |       |       | 6.4704    |       |       |
| Atom AN     |    | X         | Y     | Z     | X         | Y     | Z     | X         | Y     | Z     |
| 1           | 6  | 0.03      | -0.03 | 0.02  | 0.08      | -0.10 | 0.10  | 0.11      | 0.00  | 0.10  |
| 2           | 6  | -0.01     | -0.01 | 0.00  | 0.00      | 0.08  | -0.09 | -0.04     | -0.03 | 0.00  |
| 3           | 8  | 0.00      | 0.00  | 0.00  | -0.02     | -0.02 | 0.02  | 0.01      | 0.00  | -0.01 |
| 4           | 6  | 0.00      | 0.02  | 0.01  | 0.00      | 0.01  | -0.02 | 0.02      | -0.01 | 0.05  |
| 5           | 6  | 0.03      | 0.00  | 0.03  | 0.05      | 0.04  | 0.04  | -0.11     | -0.03 | -0.12 |
| 6           | 7  | 0.01      | 0.03  | -0.04 | -0.01     | -0.02 | 0.03  | 0.00      | 0.01  | 0.00  |
| 7           | 6  | 0.01      | -0.06 | 0.04  | -0.01     | 0.01  | 0.00  | 0.00      | 0.00  | 0.00  |
| 8           | 6  | -0.05     | -0.07 | 0.06  | 0.02      | 0.00  | 0.00  | 0.00      | 0.00  | 0.00  |
| 9           | 7  | 0.11      | 0.08  | -0.12 | -0.02     | -0.01 | 0.02  | 0.00      | 0.00  | 0.00  |
| 10          | 6  | 0.00      | -0.06 | 0.07  | 0.01      | 0.02  | -0.02 | 0.00      | 0.00  | 0.00  |
| 11          | 6  | -0.11     | 0.09  | -0.02 | 0.03      | -0.02 | 0.00  | 0.00      | 0.00  | 0.00  |
| 12          | 7  | 0.05      | -0.04 | 0.01  | -0.01     | 0.02  | -0.01 | 0.00      | 0.00  | 0.00  |
| 13          | 6  | -0.05     | 0.01  | 0.02  | 0.01      | -0.01 | 0.00  | 0.00      | 0.00  | 0.00  |
| 14          | 7  | 0.01      | 0.04  | -0.04 | 0.01      | 0.00  | 0.00  | 0.00      | 0.00  | 0.00  |
| 15          | 7  | 0.05      | -0.03 | 0.00  | -0.01     | 0.01  | 0.00  | 0.00      | 0.00  | 0.00  |
| 16          | 6  | -0.01     | 0.00  | 0.00  | 0.00      | 0.00  | 0.01  | -0.01     | 0.01  | -0.02 |
| 17          | 16 | 0.00      | 0.00  | 0.00  | 0.00      | 0.00  | 0.00  | 0.00      | 0.00  | 0.00  |
| 18          | 6  | -0.01     | 0.00  | 0.00  | -0.01     | 0.00  | 0.00  | 0.01      | 0.00  | 0.00  |
| 19          | 8  | 0.00      | -0.02 | -0.01 | -0.01     | -0.04 | -0.01 | 0.00      | 0.04  | 0.02  |
| 20          | 8  | 0.00      | 0.00  | -0.02 | -0.01     | 0.00  | -0.06 | -0.01     | -0.01 | -0.04 |
| 21          | 1  | 0.00      | -0.01 | 0.00  | -0.03     | 0.01  | 0.01  | 0.02      | 0.00  | -0.01 |
| 22          | 1  | -0.23     | 0.16  | 0.06  | 0.04      | -0.02 | -0.03 | -0.01     | 0.01  | 0.01  |
| 23          | 1  | -0.01     | 0.04  | -0.02 | -0.11     | -0.19 | 0.08  | 0.06      | 0.16  | -0.15 |
| 24          | 1  | -0.12     | 0.11  | -0.05 | -0.29     | 0.22  | -0.14 | -0.16     | 0.09  | -0.30 |
| 25          | 1  | -0.09     | 0.09  | -0.15 | -0.12     | 0.06  | -0.14 | 0.42      | -0.11 | 0.41  |
| 26          | 1  | -0.07     | -0.10 | -0.04 | 0.03      | -0.03 | 0.16  | -0.06     | 0.01  | -0.25 |
| 27          | 1  | -0.09     | 0.13  | 0.13  | -0.30     | 0.40  | 0.43  | -0.18     | 0.23  | 0.25  |
| 28          | 1  | 0.01      | 0.02  | 0.01  | 0.00      | 0.00  | -0.01 | 0.01      | -0.06 | 0.11  |
| 29          | 1  | 0.00      | -0.01 | 0.00  | -0.02     | -0.02 | -0.02 | 0.12      | 0.00  | 0.04  |
| 30          | 1  | 0.02      | 0.01  | -0.02 | 0.02      | 0.01  | -0.03 | -0.03     | -0.02 | 0.01  |
| 31          | 1  | 0.02      | -0.01 | -0.02 | 0.03      | -0.01 | -0.03 | -0.03     | 0.01  | 0.03  |
| 32          | 1  | 0.03      | -0.01 | 0.00  | 0.04      | 0.00  | 0.00  | -0.04     | -0.02 | 0.00  |
| 33          | 1  | -0.11     | 0.15  | -0.07 | -0.24     | 0.31  | -0.15 | 0.20      | -0.29 | 0.16  |
| 34          | 1  | 0.10      | -0.04 | -0.01 | -0.02     | 0.01  | 0.00  | 0.00      | 0.00  | 0.00  |
| 35          | 1  | 0.10      | -0.10 | 0.03  | -0.03     | 0.03  | -0.01 | 0.00      | 0.00  | 0.00  |
| 36          | 1  | -0.61     | -0.08 | 0.49  | 0.15      | 0.03  | -0.12 | -0.02     | -0.01 | 0.02  |
|             |    |           | 79    |       |           | 80    |       |           | 81    |       |
|             |    |           | A     |       |           | A     |       |           | A     |       |
| Frequencies | -- | 1466.0126 |       |       | 1477.4930 |       |       | 1486.8372 |       |       |
| Red. masses | -- | 6.2627    |       |       | 1.0690    |       |       | 1.0857    |       |       |
| Frc consts  | -- | 7.9302    |       |       | 1.3749    |       |       | 1.4141    |       |       |
| IR Inten    | -- | 191.6600  |       |       | 7.6374    |       |       | 3.7143    |       |       |
| Atom AN     |    | X         | Y     | Z     | X         | Y     | Z     | X         | Y     | Z     |

|    |    |       |       |       |       |       |       |       |       |       |
|----|----|-------|-------|-------|-------|-------|-------|-------|-------|-------|
| 1  | 6  | 0.01  | -0.01 | 0.01  | 0.00  | 0.00  | 0.01  | 0.00  | 0.00  | 0.01  |
| 2  | 6  | -0.06 | 0.02  | -0.01 | 0.00  | 0.00  | 0.00  | 0.00  | 0.00  | 0.00  |
| 3  | 8  | 0.03  | 0.00  | -0.01 | 0.00  | 0.00  | 0.00  | 0.00  | 0.00  | 0.00  |
| 4  | 6  | -0.01 | 0.00  | 0.00  | 0.01  | 0.00  | 0.01  | 0.01  | 0.00  | 0.02  |
| 5  | 6  | 0.01  | 0.01  | 0.01  | 0.00  | 0.00  | -0.01 | 0.00  | 0.01  | -0.01 |
| 6  | 7  | -0.17 | -0.03 | 0.15  | 0.01  | 0.00  | 0.00  | 0.01  | 0.00  | 0.00  |
| 7  | 6  | 0.41  | 0.06  | -0.26 | -0.01 | 0.00  | 0.01  | -0.01 | 0.00  | 0.01  |
| 8  | 6  | -0.14 | 0.22  | -0.10 | 0.00  | -0.01 | 0.00  | 0.00  | 0.00  | 0.00  |
| 9  | 7  | 0.02  | -0.06 | 0.06  | 0.00  | 0.00  | 0.00  | 0.00  | 0.00  | 0.00  |
| 10 | 6  | 0.05  | -0.02 | -0.02 | 0.00  | 0.00  | 0.00  | 0.00  | 0.00  | 0.00  |
| 11 | 6  | -0.15 | 0.03  | 0.05  | 0.01  | 0.00  | 0.00  | 0.00  | 0.00  | 0.00  |
| 12 | 7  | 0.03  | 0.00  | -0.01 | 0.00  | 0.00  | 0.00  | 0.00  | 0.00  | 0.00  |
| 13 | 6  | 0.04  | -0.02 | 0.00  | 0.00  | 0.00  | 0.00  | 0.00  | 0.00  | 0.00  |
| 14 | 7  | -0.11 | -0.09 | 0.12  | 0.00  | 0.00  | 0.00  | 0.00  | 0.00  | 0.00  |
| 15 | 7  | 0.07  | -0.02 | -0.02 | 0.00  | 0.00  | 0.00  | 0.00  | 0.00  | 0.00  |
| 16 | 6  | 0.01  | -0.02 | 0.00  | 0.01  | -0.04 | 0.00  | 0.02  | -0.07 | 0.01  |
| 17 | 16 | 0.00  | 0.00  | 0.00  | 0.00  | 0.00  | 0.00  | 0.00  | 0.00  | 0.00  |
| 18 | 6  | 0.00  | -0.01 | 0.00  | -0.01 | -0.05 | 0.00  | -0.01 | 0.03  | -0.01 |
| 19 | 8  | 0.00  | -0.01 | 0.00  | 0.00  | 0.00  | 0.00  | 0.00  | 0.00  | 0.00  |
| 20 | 8  | 0.00  | 0.00  | 0.00  | 0.00  | 0.00  | 0.00  | 0.00  | 0.00  | 0.00  |
| 21 | 1  | 0.17  | -0.08 | -0.03 | 0.00  | 0.00  | 0.00  | 0.00  | 0.00  | 0.00  |
| 22 | 1  | -0.18 | 0.17  | -0.11 | 0.01  | -0.01 | 0.00  | 0.01  | -0.01 | 0.00  |
| 23 | 1  | 0.27  | -0.23 | -0.13 | 0.00  | 0.02  | -0.01 | -0.01 | 0.01  | 0.00  |
| 24 | 1  | -0.02 | -0.02 | -0.04 | -0.01 | 0.00  | -0.02 | -0.01 | -0.01 | -0.03 |
| 25 | 1  | -0.04 | 0.03  | -0.05 | 0.02  | -0.02 | 0.02  | 0.02  | -0.05 | 0.04  |
| 26 | 1  | -0.01 | 0.00  | 0.00  | -0.03 | -0.02 | -0.05 | -0.01 | 0.00  | -0.05 |
| 27 | 1  | -0.01 | 0.01  | 0.02  | -0.01 | 0.01  | 0.01  | -0.01 | 0.01  | 0.01  |
| 28 | 1  | 0.01  | 0.09  | -0.11 | 0.06  | 0.28  | -0.21 | 0.10  | 0.46  | -0.36 |
| 29 | 1  | -0.11 | 0.09  | 0.03  | -0.25 | 0.21  | 0.08  | -0.44 | 0.35  | 0.12  |
| 30 | 1  | 0.01  | 0.01  | 0.03  | -0.02 | 0.10  | 0.43  | 0.12  | 0.03  | -0.21 |
| 31 | 1  | 0.02  | 0.00  | -0.05 | 0.11  | 0.02  | -0.39 | 0.05  | -0.10 | 0.29  |
| 32 | 1  | 0.01  | 0.06  | 0.00  | -0.01 | 0.63  | -0.01 | -0.02 | -0.38 | 0.01  |
| 33 | 1  | -0.03 | 0.05  | -0.02 | 0.01  | -0.01 | 0.01  | 0.01  | -0.01 | 0.00  |
| 34 | 1  | 0.03  | 0.03  | 0.02  | 0.00  | 0.00  | 0.00  | 0.00  | 0.00  | 0.00  |
| 35 | 1  | 0.18  | -0.19 | 0.05  | -0.01 | 0.01  | 0.00  | 0.00  | 0.01  | 0.00  |
| 36 | 1  | -0.25 | -0.22 | 0.20  | 0.01  | 0.01  | -0.01 | 0.01  | 0.00  | -0.01 |

82

83

84

A

A

A

Frequencies -- 1492.7194

1505.1427

1603.1919

Red. masses -- 2.3697

1.0536

8.4445

Frc consts -- 3.1110

1.4063

12.7877

IR Inten -- 32.3197

6.9425

34.5842

| Atom | AN | X     | Y     | Z     | X    | Y    | Z    | X     | Y     | Z     |
|------|----|-------|-------|-------|------|------|------|-------|-------|-------|
| 1    | 6  | 0.00  | 0.00  | 0.00  | 0.00 | 0.00 | 0.00 | 0.00  | 0.00  | 0.00  |
| 2    | 6  | 0.00  | 0.00  | 0.00  | 0.00 | 0.00 | 0.00 | -0.01 | 0.02  | -0.01 |
| 3    | 8  | 0.00  | 0.00  | 0.00  | 0.00 | 0.00 | 0.00 | 0.01  | 0.00  | 0.00  |
| 4    | 6  | 0.00  | 0.00  | 0.00  | 0.00 | 0.00 | 0.00 | -0.01 | 0.00  | -0.01 |
| 5    | 6  | 0.00  | 0.00  | 0.00  | 0.00 | 0.00 | 0.00 | 0.00  | 0.00  | 0.00  |
| 6    | 7  | 0.01  | -0.01 | 0.00  | 0.00 | 0.00 | 0.00 | 0.03  | -0.07 | 0.04  |
| 7    | 6  | 0.00  | 0.00  | 0.00  | 0.00 | 0.00 | 0.00 | -0.10 | 0.46  | -0.29 |
| 8    | 6  | -0.08 | 0.02  | 0.02  | 0.00 | 0.00 | 0.00 | -0.02 | -0.24 | 0.19  |
| 9    | 7  | 0.04  | 0.01  | -0.03 | 0.00 | 0.00 | 0.00 | 0.01  | 0.03  | -0.03 |
| 10   | 6  | -0.02 | 0.01  | 0.01  | 0.00 | 0.00 | 0.00 | 0.00  | -0.02 | 0.00  |
| 11   | 6  | 0.08  | -0.17 | 0.10  | 0.00 | 0.00 | 0.00 | 0.16  | 0.15  | -0.20 |
| 12   | 7  | 0.03  | 0.08  | -0.08 | 0.00 | 0.00 | 0.00 | 0.09  | -0.17 | 0.07  |
| 13   | 6  | -0.18 | 0.05  | 0.06  | 0.00 | 0.00 | 0.00 | -0.14 | 0.11  | 0.00  |
| 14   | 7  | 0.08  | -0.03 | -0.02 | 0.00 | 0.00 | 0.00 | -0.01 | -0.21 | 0.16  |

|    |    |       |       |       |       |       |       |       |       |       |
|----|----|-------|-------|-------|-------|-------|-------|-------|-------|-------|
| 15 | 7  | -0.01 | 0.03  | -0.02 | 0.00  | 0.00  | 0.00  | -0.08 | 0.01  | 0.03  |
| 16 | 6  | 0.00  | 0.00  | 0.00  | -0.01 | 0.01  | 0.00  | 0.00  | 0.00  | 0.00  |
| 17 | 16 | 0.00  | 0.00  | 0.00  | 0.00  | 0.00  | 0.00  | 0.00  | 0.00  | 0.00  |
| 18 | 6  | 0.00  | 0.00  | 0.00  | -0.04 | 0.00  | -0.05 | 0.00  | 0.00  | 0.00  |
| 19 | 8  | 0.00  | 0.00  | 0.00  | 0.00  | 0.00  | 0.00  | 0.00  | 0.00  | 0.00  |
| 20 | 8  | 0.00  | 0.00  | 0.00  | 0.00  | 0.00  | 0.00  | 0.00  | 0.00  | 0.00  |
| 21 | 1  | 0.78  | -0.29 | -0.19 | 0.00  | 0.00  | 0.00  | 0.32  | -0.07 | -0.12 |
| 22 | 1  | 0.01  | -0.01 | 0.02  | 0.00  | 0.00  | 0.00  | -0.03 | 0.03  | 0.05  |
| 23 | 1  | -0.01 | 0.00  | 0.00  | 0.00  | 0.00  | 0.00  | 0.04  | -0.07 | -0.01 |
| 24 | 1  | 0.01  | 0.00  | 0.00  | 0.00  | 0.00  | 0.00  | 0.04  | -0.05 | 0.00  |
| 25 | 1  | 0.00  | 0.00  | 0.00  | 0.00  | 0.01  | 0.00  | 0.00  | 0.01  | -0.01 |
| 26 | 1  | 0.00  | 0.00  | 0.00  | 0.00  | 0.01  | 0.01  | 0.00  | 0.00  | 0.02  |
| 27 | 1  | 0.00  | 0.00  | 0.00  | 0.00  | 0.00  | 0.00  | 0.00  | -0.01 | -0.01 |
| 28 | 1  | 0.00  | 0.00  | 0.00  | -0.03 | -0.10 | 0.06  | -0.01 | -0.01 | 0.00  |
| 29 | 1  | 0.00  | 0.00  | 0.00  | 0.10  | -0.07 | -0.02 | 0.01  | -0.01 | 0.00  |
| 30 | 1  | 0.00  | 0.00  | 0.00  | 0.40  | 0.40  | 0.35  | 0.00  | 0.00  | 0.00  |
| 31 | 1  | 0.00  | 0.00  | 0.00  | 0.41  | -0.37 | 0.34  | 0.00  | 0.00  | 0.00  |
| 32 | 1  | 0.00  | 0.00  | 0.00  | -0.32 | 0.01  | 0.01  | 0.00  | 0.00  | 0.00  |
| 33 | 1  | 0.00  | 0.00  | 0.00  | -0.01 | 0.01  | 0.00  | 0.00  | 0.00  | 0.00  |
| 34 | 1  | -0.31 | 0.13  | 0.08  | 0.00  | 0.00  | 0.00  | 0.38  | -0.11 | -0.12 |
| 35 | 1  | -0.05 | 0.04  | -0.08 | 0.00  | 0.00  | 0.00  | -0.06 | 0.08  | 0.13  |
| 36 | 1  | -0.12 | -0.06 | 0.09  | 0.00  | 0.00  | 0.00  | -0.04 | 0.06  | 0.05  |

85

86

87

|             |    | A         | A         | A         |
|-------------|----|-----------|-----------|-----------|
| Frequencies | -- | 1635.4888 | 1669.9040 | 3062.9084 |
| Red. masses | -- | 1.5682    | 3.3029    | 1.0847    |
| Frc consts  | -- | 2.4715    | 5.4267    | 5.9957    |
| IR Inten    | -- | 21.1184   | 510.3753  | 3.9203    |

| Atom | AN | X     | Y     | Z     | X     | Y     | Z     | X     | Y     | Z     |
|------|----|-------|-------|-------|-------|-------|-------|-------|-------|-------|
| 1    | 6  | 0.00  | 0.00  | 0.00  | 0.00  | 0.00  | 0.00  | 0.00  | 0.00  | 0.00  |
| 2    | 6  | 0.00  | 0.00  | 0.00  | 0.01  | 0.00  | 0.00  | 0.00  | 0.00  | 0.00  |
| 3    | 8  | 0.00  | 0.00  | 0.00  | 0.00  | 0.00  | 0.00  | 0.00  | 0.00  | 0.00  |
| 4    | 6  | 0.00  | 0.00  | 0.00  | 0.00  | 0.00  | 0.00  | -0.05 | 0.02  | 0.02  |
| 5    | 6  | 0.00  | 0.00  | 0.00  | 0.00  | 0.00  | 0.00  | 0.04  | -0.03 | -0.04 |
| 6    | 7  | -0.01 | 0.00  | 0.00  | -0.02 | -0.02 | 0.02  | 0.00  | 0.00  | 0.00  |
| 7    | 6  | -0.03 | 0.01  | 0.01  | -0.05 | 0.07  | -0.02 | 0.00  | 0.00  | 0.00  |
| 8    | 6  | 0.11  | 0.02  | -0.07 | 0.24  | -0.02 | -0.10 | 0.00  | 0.00  | 0.00  |
| 9    | 7  | -0.02 | -0.01 | 0.02  | -0.05 | -0.01 | 0.03  | 0.00  | 0.00  | 0.00  |
| 10   | 6  | -0.01 | 0.00  | 0.00  | 0.00  | 0.00  | 0.00  | 0.00  | 0.00  | 0.00  |
| 11   | 6  | -0.09 | -0.04 | 0.05  | -0.24 | 0.09  | 0.07  | 0.00  | 0.00  | 0.00  |
| 12   | 7  | 0.04  | -0.02 | 0.00  | 0.08  | -0.07 | 0.01  | 0.00  | 0.00  | 0.00  |
| 13   | 6  | -0.08 | 0.03  | 0.01  | -0.12 | 0.05  | 0.03  | 0.00  | 0.00  | 0.00  |
| 14   | 7  | 0.04  | 0.00  | -0.02 | 0.05  | -0.02 | -0.01 | 0.00  | 0.00  | 0.00  |
| 15   | 7  | -0.06 | 0.05  | -0.03 | 0.13  | -0.06 | 0.01  | 0.00  | 0.00  | 0.00  |
| 16   | 6  | 0.00  | 0.00  | 0.00  | 0.00  | 0.00  | 0.00  | 0.00  | 0.00  | 0.00  |
| 17   | 16 | 0.00  | 0.00  | 0.00  | 0.00  | 0.00  | 0.00  | 0.00  | 0.00  | 0.00  |
| 18   | 6  | 0.00  | 0.00  | 0.00  | 0.00  | 0.00  | 0.00  | 0.00  | 0.00  | 0.00  |
| 19   | 8  | 0.00  | 0.00  | 0.00  | 0.00  | 0.00  | 0.00  | 0.00  | 0.00  | 0.00  |
| 20   | 8  | 0.00  | 0.00  | 0.00  | 0.00  | 0.00  | 0.00  | 0.00  | 0.00  | 0.00  |
| 21   | 1  | 0.09  | -0.02 | -0.03 | 0.14  | -0.05 | -0.04 | 0.00  | 0.00  | 0.00  |
| 22   | 1  | 0.01  | -0.02 | 0.00  | 0.01  | -0.01 | 0.00  | 0.00  | 0.00  | 0.00  |
| 23   | 1  | -0.01 | 0.01  | 0.01  | -0.01 | 0.00  | 0.01  | 0.01  | 0.00  | 0.01  |
| 24   | 1  | 0.00  | 0.00  | 0.00  | 0.01  | -0.01 | 0.00  | 0.02  | 0.01  | -0.01 |
| 25   | 1  | 0.00  | 0.00  | 0.00  | 0.01  | 0.00  | 0.00  | -0.43 | 0.40  | 0.48  |
| 26   | 1  | 0.00  | 0.00  | 0.00  | 0.00  | 0.00  | 0.00  | 0.55  | -0.26 | -0.17 |
| 27   | 1  | 0.00  | 0.00  | 0.00  | 0.00  | 0.00  | 0.00  | 0.00  | 0.00  | 0.00  |
| 28   | 1  | 0.00  | 0.00  | 0.00  | 0.00  | 0.00  | 0.00  | -0.04 | 0.02  | 0.01  |

|             |    |           |       |       |           |       |       |           |       |       |
|-------------|----|-----------|-------|-------|-----------|-------|-------|-----------|-------|-------|
| 29          | 1  | 0.00      | 0.00  | 0.00  | 0.00      | 0.00  | 0.00  | -0.01     | -0.02 | 0.02  |
| 30          | 1  | 0.00      | 0.00  | 0.00  | 0.00      | 0.00  | 0.00  | -0.02     | 0.03  | -0.01 |
| 31          | 1  | 0.00      | 0.00  | 0.00  | 0.00      | 0.00  | 0.00  | -0.01     | -0.03 | -0.01 |
| 32          | 1  | 0.00      | 0.00  | 0.00  | 0.00      | 0.00  | 0.00  | 0.01      | 0.00  | 0.04  |
| 33          | 1  | 0.00      | 0.00  | 0.00  | 0.00      | 0.00  | 0.00  | 0.00      | 0.00  | 0.00  |
| 34          | 1  | 0.61      | 0.04  | -0.13 | -0.65     | -0.04 | 0.15  | 0.00      | 0.00  | 0.00  |
| 35          | 1  | 0.39      | -0.45 | 0.44  | -0.22     | 0.23  | -0.43 | 0.00      | 0.00  | 0.00  |
| 36          | 1  | 0.05      | 0.01  | -0.04 | 0.15      | 0.05  | -0.11 | 0.00      | 0.00  | 0.00  |
|             |    |           | 88    |       |           | 89    |       |           | 90    |       |
|             |    |           | A     |       |           | A     |       |           | A     |       |
| Frequencies | -- | 3069.0864 |       |       | 3069.6467 |       |       | 3075.5770 |       |       |
| Red. masses | -- | 1.0602    |       |       | 1.0493    |       |       | 1.0647    |       |       |
| Frc consts  | -- | 5.8840    |       |       | 5.8253    |       |       | 5.9338    |       |       |
| IR Inten    | -- | 4.9161    |       |       | 45.8824   |       |       | 27.9073   |       |       |
| Atom AN     |    | X         | Y     | Z     | X         | Y     | Z     | X         | Y     | Z     |
| 1           | 6  | 0.00      | 0.00  | 0.00  | 0.00      | 0.00  | 0.00  | 0.00      | 0.00  | 0.00  |
| 2           | 6  | 0.00      | 0.00  | 0.00  | 0.00      | 0.00  | 0.00  | 0.00      | 0.00  | 0.00  |
| 3           | 8  | 0.00      | 0.00  | 0.00  | 0.00      | 0.00  | 0.00  | 0.00      | 0.00  | 0.00  |
| 4           | 6  | -0.04     | 0.02  | 0.01  | 0.03      | -0.02 | -0.01 | -0.03     | 0.01  | 0.01  |
| 5           | 6  | -0.02     | 0.02  | 0.03  | 0.01      | -0.01 | -0.02 | -0.01     | 0.01  | 0.02  |
| 6           | 7  | 0.00      | 0.00  | 0.00  | 0.00      | 0.00  | 0.00  | 0.00      | 0.00  | 0.00  |
| 7           | 6  | 0.00      | 0.00  | 0.00  | 0.00      | 0.00  | 0.00  | 0.00      | 0.00  | 0.00  |
| 8           | 6  | 0.00      | 0.00  | 0.00  | 0.00      | 0.00  | 0.00  | 0.00      | 0.00  | 0.00  |
| 9           | 7  | 0.00      | 0.00  | 0.00  | 0.00      | 0.00  | 0.00  | 0.00      | 0.00  | 0.00  |
| 10          | 6  | 0.00      | 0.00  | 0.00  | 0.00      | 0.00  | 0.00  | 0.00      | 0.00  | 0.00  |
| 11          | 6  | 0.00      | 0.00  | 0.00  | 0.00      | 0.00  | 0.00  | 0.00      | 0.00  | 0.00  |
| 12          | 7  | 0.00      | 0.00  | 0.00  | 0.00      | 0.00  | 0.00  | 0.00      | 0.00  | 0.00  |
| 13          | 6  | 0.00      | 0.00  | 0.00  | 0.00      | 0.00  | 0.00  | 0.00      | 0.00  | 0.00  |
| 14          | 7  | 0.00      | 0.00  | 0.00  | 0.00      | 0.00  | 0.00  | 0.00      | 0.00  | 0.00  |
| 15          | 7  | 0.00      | 0.00  | 0.00  | 0.00      | 0.00  | 0.00  | 0.00      | 0.00  | 0.00  |
| 16          | 6  | 0.01      | -0.02 | 0.00  | -0.01     | 0.02  | 0.00  | -0.02     | 0.05  | -0.03 |
| 17          | 16 | 0.00      | 0.00  | 0.00  | 0.00      | 0.00  | 0.00  | 0.00      | 0.00  | 0.00  |
| 18          | 6  | 0.03      | 0.00  | -0.01 | 0.03      | 0.00  | -0.02 | 0.00      | 0.00  | 0.00  |
| 19          | 8  | 0.00      | 0.00  | 0.00  | 0.00      | 0.00  | 0.00  | 0.00      | 0.00  | 0.00  |
| 20          | 8  | 0.00      | 0.00  | 0.00  | 0.00      | 0.00  | 0.00  | 0.00      | 0.00  | 0.00  |
| 21          | 1  | 0.00      | 0.00  | 0.00  | 0.00      | 0.00  | 0.00  | 0.00      | 0.00  | 0.00  |
| 22          | 1  | 0.00      | 0.00  | 0.00  | 0.00      | 0.00  | 0.00  | 0.01      | 0.01  | 0.00  |
| 23          | 1  | 0.00      | 0.00  | 0.01  | 0.00      | 0.00  | -0.01 | 0.00      | 0.00  | 0.00  |
| 24          | 1  | -0.01     | -0.01 | 0.01  | 0.01      | 0.00  | 0.00  | 0.00      | 0.00  | 0.00  |
| 25          | 1  | 0.27      | -0.25 | -0.31 | -0.17     | 0.16  | 0.19  | 0.16      | -0.14 | -0.18 |
| 26          | 1  | 0.44      | -0.21 | -0.14 | -0.37     | 0.17  | 0.12  | 0.31      | -0.14 | -0.10 |
| 27          | 1  | 0.00      | 0.00  | 0.00  | 0.00      | 0.00  | 0.00  | 0.00      | 0.00  | 0.00  |
| 28          | 1  | -0.22     | 0.09  | 0.09  | 0.25      | -0.11 | -0.10 | 0.46      | -0.21 | -0.20 |
| 29          | 1  | 0.07      | 0.10  | -0.12 | -0.08     | -0.13 | 0.16  | -0.26     | -0.41 | 0.50  |
| 30          | 1  | -0.19     | 0.30  | -0.11 | -0.22     | 0.36  | -0.13 | 0.03      | -0.05 | 0.02  |
| 31          | 1  | -0.18     | -0.31 | -0.10 | -0.22     | -0.38 | -0.12 | 0.03      | 0.05  | 0.01  |
| 32          | 1  | 0.07      | 0.01  | 0.37  | 0.07      | 0.01  | 0.43  | -0.01     | 0.00  | -0.06 |
| 33          | 1  | 0.00      | 0.00  | 0.00  | 0.00      | 0.00  | 0.00  | 0.00      | 0.00  | 0.00  |
| 34          | 1  | 0.00      | 0.00  | 0.00  | 0.00      | 0.00  | 0.00  | 0.00      | 0.00  | 0.00  |
| 35          | 1  | 0.00      | 0.00  | 0.00  | 0.00      | 0.00  | 0.00  | 0.00      | 0.00  | 0.00  |
| 36          | 1  | 0.00      | 0.00  | 0.00  | 0.00      | 0.00  | 0.00  | 0.00      | 0.00  | 0.00  |
|             |    |           | 91    |       |           | 92    |       |           | 93    |       |
|             |    |           | A     |       |           | A     |       |           | A     |       |
| Frequencies | -- | 3130.3434 |       |       | 3143.0445 |       |       | 3149.5669 |       |       |
| Red. masses | -- | 1.1071    |       |       | 1.0893    |       |       | 1.0890    |       |       |
| Frc consts  | -- | 6.3920    |       |       | 6.3401    |       |       | 6.3646    |       |       |
| IR Inten    | -- | 10.3102   |       |       | 39.1905   |       |       | 1.8884    |       |       |

| Atom | AN | X     | Y     | Z     | X     | Y     | Z     | X     | Y     | Z     |
|------|----|-------|-------|-------|-------|-------|-------|-------|-------|-------|
| 1    | 6  | 0.00  | 0.00  | 0.00  | 0.00  | 0.00  | 0.00  | -0.06 | -0.05 | 0.03  |
| 2    | 6  | 0.00  | 0.00  | 0.00  | 0.00  | 0.00  | 0.00  | 0.00  | 0.00  | 0.01  |
| 3    | 8  | 0.00  | 0.00  | 0.00  | 0.00  | 0.00  | 0.00  | 0.00  | 0.00  | 0.00  |
| 4    | 6  | -0.01 | 0.00  | 0.00  | 0.00  | 0.00  | 0.00  | 0.00  | 0.00  | 0.00  |
| 5    | 6  | 0.00  | 0.00  | 0.00  | 0.00  | 0.00  | 0.00  | 0.00  | 0.00  | 0.00  |
| 6    | 7  | 0.00  | 0.00  | 0.00  | 0.00  | 0.00  | 0.00  | 0.00  | 0.00  | 0.00  |
| 7    | 6  | 0.00  | 0.00  | 0.00  | 0.00  | 0.00  | 0.00  | 0.00  | 0.00  | 0.00  |
| 8    | 6  | 0.00  | 0.00  | 0.00  | 0.00  | 0.00  | 0.00  | 0.00  | 0.00  | 0.00  |
| 9    | 7  | 0.00  | 0.00  | 0.00  | 0.00  | 0.00  | 0.00  | 0.00  | 0.00  | 0.00  |
| 10   | 6  | 0.00  | 0.00  | 0.00  | -0.06 | -0.06 | 0.03  | 0.00  | 0.00  | 0.00  |
| 11   | 6  | 0.00  | 0.00  | 0.00  | 0.00  | 0.00  | 0.00  | 0.00  | 0.00  | 0.00  |
| 12   | 7  | 0.00  | 0.00  | 0.00  | 0.00  | 0.00  | 0.00  | 0.00  | 0.00  | 0.00  |
| 13   | 6  | 0.00  | 0.00  | 0.00  | 0.00  | 0.00  | 0.00  | 0.00  | 0.00  | 0.00  |
| 14   | 7  | 0.00  | 0.00  | 0.00  | 0.00  | 0.00  | 0.00  | 0.00  | 0.00  | 0.00  |
| 15   | 7  | 0.00  | 0.00  | 0.00  | 0.00  | 0.00  | 0.00  | 0.00  | 0.00  | 0.00  |
| 16   | 6  | -0.07 | -0.01 | 0.06  | 0.00  | 0.00  | 0.00  | 0.00  | 0.00  | 0.00  |
| 17   | 16 | 0.00  | 0.00  | 0.00  | 0.00  | 0.00  | 0.00  | 0.00  | 0.00  | 0.00  |
| 18   | 6  | 0.00  | 0.00  | 0.00  | 0.00  | 0.00  | 0.00  | 0.00  | 0.00  | 0.00  |
| 19   | 8  | 0.00  | 0.00  | 0.00  | 0.00  | 0.00  | 0.00  | 0.00  | 0.00  | 0.00  |
| 20   | 8  | 0.00  | 0.00  | 0.00  | 0.00  | 0.00  | 0.00  | 0.00  | 0.00  | 0.00  |
| 21   | 1  | 0.00  | 0.00  | 0.00  | 0.00  | 0.00  | 0.00  | 0.00  | 0.01  | -0.01 |
| 22   | 1  | 0.01  | 0.01  | -0.01 | 0.69  | 0.66  | -0.30 | 0.00  | 0.00  | 0.00  |
| 23   | 1  | 0.00  | 0.00  | 0.01  | 0.00  | 0.00  | 0.00  | -0.06 | -0.04 | -0.09 |
| 24   | 1  | 0.00  | 0.00  | 0.00  | 0.00  | 0.00  | 0.00  | 0.74  | 0.53  | -0.39 |
| 25   | 1  | 0.02  | -0.01 | -0.02 | 0.00  | 0.00  | 0.00  | 0.01  | -0.02 | -0.02 |
| 26   | 1  | 0.11  | -0.05 | -0.04 | 0.00  | 0.00  | 0.00  | 0.00  | 0.00  | 0.00  |
| 27   | 1  | 0.00  | 0.00  | 0.00  | 0.00  | 0.00  | 0.00  | 0.00  | 0.00  | 0.00  |
| 28   | 1  | 0.63  | -0.30 | -0.25 | -0.02 | 0.01  | 0.01  | 0.00  | 0.00  | 0.00  |
| 29   | 1  | 0.23  | 0.39  | -0.47 | 0.00  | 0.00  | 0.00  | 0.00  | 0.00  | 0.00  |
| 30   | 1  | 0.00  | 0.00  | 0.00  | 0.00  | 0.00  | 0.00  | 0.00  | 0.00  | 0.00  |
| 31   | 1  | 0.02  | 0.03  | 0.01  | 0.00  | 0.00  | 0.00  | 0.00  | 0.00  | 0.00  |
| 32   | 1  | 0.01  | 0.00  | 0.02  | 0.00  | 0.00  | 0.00  | 0.00  | 0.00  | 0.00  |
| 33   | 1  | 0.00  | 0.00  | 0.00  | 0.00  | 0.00  | 0.00  | 0.00  | 0.00  | 0.00  |
| 34   | 1  | 0.00  | 0.00  | 0.00  | 0.00  | 0.00  | 0.00  | 0.00  | 0.00  | 0.00  |
| 35   | 1  | 0.00  | 0.00  | 0.00  | 0.00  | 0.00  | 0.00  | 0.00  | 0.00  | 0.00  |
| 36   | 1  | 0.00  | 0.00  | 0.00  | -0.01 | 0.00  | 0.01  | 0.00  | 0.00  | 0.00  |

94

95

96

A

A

A

|             |    |           |  |           |  |           |
|-------------|----|-----------|--|-----------|--|-----------|
| Frequencies | -- | 3161.0489 |  | 3164.1773 |  | 3177.9979 |
| Red. masses | -- | 1.1075    |  | 1.1056    |  | 1.0900    |
| Frc consts  | -- | 6.5201    |  | 6.5221    |  | 6.4861    |
| IR Inten    | -- | 4.8926    |  | 8.0267    |  | 30.3618   |

| Atom | AN | X    | Y    | Z    | X    | Y    | Z    | X     | Y     | Z    |
|------|----|------|------|------|------|------|------|-------|-------|------|
| 1    | 6  | 0.00 | 0.00 | 0.00 | 0.00 | 0.00 | 0.00 | 0.00  | 0.00  | 0.00 |
| 2    | 6  | 0.00 | 0.00 | 0.00 | 0.00 | 0.00 | 0.00 | 0.00  | 0.00  | 0.00 |
| 3    | 8  | 0.00 | 0.00 | 0.00 | 0.00 | 0.00 | 0.00 | 0.00  | 0.00  | 0.00 |
| 4    | 6  | 0.00 | 0.00 | 0.00 | 0.00 | 0.00 | 0.00 | 0.00  | 0.00  | 0.00 |
| 5    | 6  | 0.00 | 0.00 | 0.00 | 0.00 | 0.00 | 0.00 | 0.00  | 0.00  | 0.00 |
| 6    | 7  | 0.00 | 0.00 | 0.00 | 0.00 | 0.00 | 0.00 | 0.00  | 0.00  | 0.00 |
| 7    | 6  | 0.00 | 0.00 | 0.00 | 0.00 | 0.00 | 0.00 | 0.00  | 0.00  | 0.00 |
| 8    | 6  | 0.00 | 0.00 | 0.00 | 0.00 | 0.00 | 0.00 | 0.00  | 0.00  | 0.00 |
| 9    | 7  | 0.00 | 0.00 | 0.00 | 0.00 | 0.00 | 0.00 | 0.00  | 0.00  | 0.00 |
| 10   | 6  | 0.00 | 0.00 | 0.00 | 0.00 | 0.00 | 0.00 | 0.00  | 0.00  | 0.00 |
| 11   | 6  | 0.00 | 0.00 | 0.00 | 0.00 | 0.00 | 0.00 | 0.00  | 0.00  | 0.00 |
| 12   | 7  | 0.00 | 0.00 | 0.00 | 0.00 | 0.00 | 0.00 | 0.00  | 0.00  | 0.00 |
| 13   | 6  | 0.00 | 0.00 | 0.00 | 0.00 | 0.00 | 0.00 | -0.01 | -0.07 | 0.05 |

|    |    |       |       |       |       |       |       |       |       |       |
|----|----|-------|-------|-------|-------|-------|-------|-------|-------|-------|
| 14 | 7  | 0.00  | 0.00  | 0.00  | 0.00  | 0.00  | 0.00  | 0.00  | 0.00  | 0.00  |
| 15 | 7  | 0.00  | 0.00  | 0.00  | 0.00  | 0.00  | 0.00  | 0.00  | 0.00  | 0.00  |
| 16 | 6  | 0.00  | 0.00  | 0.00  | 0.00  | 0.00  | 0.00  | 0.00  | 0.00  | 0.00  |
| 17 | 16 | 0.00  | 0.00  | 0.00  | 0.00  | 0.00  | 0.00  | 0.00  | 0.00  | 0.00  |
| 18 | 6  | 0.01  | -0.09 | 0.01  | -0.04 | -0.01 | -0.08 | 0.00  | 0.00  | 0.00  |
| 19 | 8  | 0.00  | 0.00  | 0.00  | 0.00  | 0.00  | 0.00  | 0.00  | 0.00  | 0.00  |
| 20 | 8  | 0.00  | 0.00  | 0.00  | 0.00  | 0.00  | 0.00  | 0.00  | 0.00  | 0.00  |
| 21 | 1  | 0.00  | 0.00  | 0.00  | 0.00  | 0.00  | 0.00  | 0.11  | 0.78  | -0.62 |
| 22 | 1  | 0.00  | 0.00  | 0.00  | 0.00  | 0.00  | 0.00  | 0.00  | 0.00  | 0.00  |
| 23 | 1  | 0.00  | 0.00  | 0.00  | 0.00  | 0.00  | 0.00  | 0.00  | 0.00  | 0.00  |
| 24 | 1  | 0.00  | 0.00  | 0.00  | 0.00  | 0.00  | 0.00  | -0.01 | -0.01 | 0.00  |
| 25 | 1  | 0.00  | 0.00  | 0.00  | 0.00  | 0.00  | 0.00  | 0.00  | 0.00  | 0.00  |
| 26 | 1  | -0.01 | 0.00  | 0.00  | -0.01 | 0.01  | 0.00  | 0.00  | 0.00  | 0.00  |
| 27 | 1  | 0.00  | 0.00  | 0.00  | 0.00  | 0.00  | 0.00  | 0.00  | 0.00  | 0.00  |
| 28 | 1  | -0.01 | 0.00  | 0.00  | -0.02 | 0.01  | 0.01  | 0.00  | 0.00  | 0.00  |
| 29 | 1  | -0.01 | -0.01 | 0.01  | -0.01 | -0.02 | 0.02  | 0.00  | 0.00  | 0.00  |
| 30 | 1  | -0.38 | 0.60  | -0.21 | 0.17  | -0.29 | 0.08  | 0.00  | 0.00  | 0.00  |
| 31 | 1  | 0.33  | 0.54  | 0.18  | 0.22  | 0.39  | 0.10  | 0.00  | 0.00  | 0.00  |
| 32 | 1  | -0.01 | -0.02 | -0.07 | 0.12  | 0.01  | 0.80  | 0.00  | 0.00  | 0.00  |
| 33 | 1  | 0.00  | 0.00  | 0.00  | 0.00  | 0.00  | 0.00  | 0.00  | 0.00  | 0.00  |
| 34 | 1  | 0.00  | 0.00  | 0.00  | 0.00  | 0.00  | 0.00  | 0.00  | 0.00  | 0.00  |
| 35 | 1  | 0.00  | 0.00  | 0.00  | 0.00  | 0.00  | 0.00  | 0.00  | 0.00  | 0.00  |
| 36 | 1  | 0.00  | 0.00  | 0.00  | 0.00  | 0.00  | 0.00  | 0.00  | 0.00  | 0.00  |

97

98

99

A

A

A

Frequencies -- 3179.1758

3563.4147

3584.3199

Red. masses -- 1.0931

1.0475

1.0771

Frc consts -- 6.5096

7.8366

8.1534

IR Inten -- 15.8075

31.4661

10.2400

| Atom | AN | X     | Y     | Z     | X    | Y     | Z    | X     | Y    | Z     |
|------|----|-------|-------|-------|------|-------|------|-------|------|-------|
| 1    | 6  | -0.01 | -0.01 | 0.00  | 0.00 | 0.00  | 0.00 | 0.00  | 0.00 | 0.00  |
| 2    | 6  | -0.05 | -0.03 | -0.07 | 0.00 | 0.00  | 0.00 | 0.00  | 0.00 | 0.00  |
| 3    | 8  | 0.00  | 0.00  | 0.00  | 0.00 | 0.00  | 0.00 | 0.00  | 0.00 | 0.00  |
| 4    | 6  | 0.00  | 0.00  | 0.00  | 0.00 | 0.00  | 0.00 | 0.00  | 0.00 | 0.00  |
| 5    | 6  | 0.00  | 0.00  | 0.00  | 0.00 | 0.00  | 0.00 | 0.00  | 0.00 | 0.00  |
| 6    | 7  | 0.00  | 0.00  | 0.00  | 0.00 | 0.00  | 0.00 | 0.00  | 0.00 | 0.00  |
| 7    | 6  | 0.00  | 0.00  | 0.00  | 0.00 | 0.00  | 0.00 | 0.00  | 0.00 | 0.00  |
| 8    | 6  | 0.00  | 0.00  | 0.00  | 0.00 | 0.00  | 0.00 | 0.00  | 0.00 | 0.00  |
| 9    | 7  | 0.00  | 0.00  | 0.00  | 0.01 | -0.01 | 0.01 | -0.04 | 0.04 | -0.04 |
| 10   | 6  | 0.00  | 0.00  | 0.00  | 0.00 | 0.00  | 0.00 | 0.00  | 0.00 | 0.00  |
| 11   | 6  | 0.00  | 0.00  | 0.00  | 0.00 | 0.00  | 0.00 | 0.00  | 0.00 | 0.00  |
| 12   | 7  | 0.00  | 0.00  | 0.00  | 0.00 | 0.00  | 0.00 | 0.00  | 0.00 | 0.00  |
| 13   | 6  | 0.00  | 0.00  | 0.00  | 0.00 | 0.00  | 0.00 | 0.00  | 0.00 | 0.00  |
| 14   | 7  | 0.00  | 0.00  | 0.00  | 0.00 | 0.00  | 0.00 | 0.00  | 0.00 | 0.00  |
| 15   | 7  | 0.00  | 0.00  | 0.00  | 0.05 | -0.01 | 0.02 | 0.01  | 0.00 | 0.00  |
| 16   | 6  | 0.00  | 0.00  | 0.00  | 0.00 | 0.00  | 0.00 | 0.00  | 0.00 | 0.00  |
| 17   | 16 | 0.00  | 0.00  | 0.00  | 0.00 | 0.00  | 0.00 | 0.00  | 0.00 | 0.00  |
| 18   | 6  | 0.00  | 0.00  | 0.00  | 0.00 | 0.00  | 0.00 | 0.00  | 0.00 | 0.00  |
| 19   | 8  | 0.00  | 0.00  | 0.00  | 0.00 | 0.00  | 0.00 | 0.00  | 0.00 | 0.00  |
| 20   | 8  | 0.00  | 0.00  | 0.00  | 0.00 | 0.00  | 0.00 | 0.00  | 0.00 | 0.00  |
| 21   | 1  | 0.00  | 0.00  | 0.00  | 0.00 | 0.00  | 0.00 | 0.00  | 0.00 | 0.00  |
| 22   | 1  | 0.00  | 0.00  | 0.00  | 0.00 | 0.00  | 0.00 | 0.00  | 0.00 | 0.00  |
| 23   | 1  | 0.52  | 0.32  | 0.78  | 0.00 | 0.00  | 0.00 | 0.00  | 0.00 | 0.00  |
| 24   | 1  | 0.08  | 0.06  | -0.05 | 0.00 | 0.00  | 0.00 | 0.00  | 0.00 | 0.00  |
| 25   | 1  | 0.00  | 0.00  | 0.00  | 0.00 | 0.00  | 0.00 | 0.00  | 0.00 | 0.00  |
| 26   | 1  | -0.01 | 0.01  | 0.00  | 0.00 | 0.00  | 0.00 | 0.00  | 0.00 | 0.00  |
| 27   | 1  | 0.00  | 0.00  | 0.00  | 0.00 | 0.00  | 0.00 | 0.00  | 0.00 | 0.00  |

|             |    |       |           |       |       |           |       |       |           |       |
|-------------|----|-------|-----------|-------|-------|-----------|-------|-------|-----------|-------|
| 28          | 1  | 0.00  | 0.00      | 0.00  | 0.00  | 0.00      | 0.00  | 0.00  | 0.00      | 0.00  |
| 29          | 1  | 0.00  | 0.00      | 0.00  | 0.00  | 0.00      | 0.00  | 0.00  | 0.00      | 0.00  |
| 30          | 1  | 0.00  | 0.00      | 0.00  | 0.00  | 0.00      | 0.00  | 0.00  | 0.00      | 0.00  |
| 31          | 1  | 0.00  | 0.00      | 0.00  | 0.00  | 0.00      | 0.00  | 0.00  | 0.00      | 0.00  |
| 32          | 1  | 0.00  | 0.00      | 0.00  | 0.00  | 0.00      | 0.00  | 0.00  | 0.00      | 0.00  |
| 33          | 1  | 0.00  | 0.00      | 0.00  | 0.00  | 0.00      | 0.00  | 0.00  | 0.00      | 0.00  |
| 34          | 1  | 0.00  | 0.00      | 0.00  | -0.09 | 0.35      | -0.58 | -0.01 | 0.04      | -0.07 |
| 35          | 1  | 0.00  | 0.00      | 0.00  | -0.59 | -0.27     | 0.30  | -0.10 | -0.05     | 0.05  |
| 36          | 1  | 0.00  | 0.00      | 0.00  | -0.09 | 0.07      | -0.08 | 0.61  | -0.52     | 0.58  |
|             |    |       | 100       |       |       | 101       |       |       | 102       |       |
|             |    |       | A         |       |       | A         |       |       | A         |       |
| Frequencies | -- |       | 3682.7308 |       |       | 3743.7479 |       |       | 3760.3394 |       |
| Red. masses | -- |       | 1.0996    |       |       | 1.0661    |       |       | 1.0656    |       |
| Frc consts  | -- |       | 8.7870    |       |       | 8.8034    |       |       | 8.8773    |       |
| IR Inten    | -- |       | 21.5431   |       |       | 135.1340  |       |       | 48.0940   |       |
| Atom        | AN | X     | Y         | Z     | X     | Y         | Z     | X     | Y         | Z     |
| 1           | 6  | 0.00  | 0.00      | 0.00  | 0.00  | 0.00      | 0.00  | 0.00  | 0.00      | 0.00  |
| 2           | 6  | 0.00  | 0.00      | 0.00  | 0.00  | 0.00      | 0.00  | 0.00  | 0.00      | 0.00  |
| 3           | 8  | 0.00  | 0.00      | 0.00  | 0.00  | 0.00      | 0.00  | 0.00  | 0.00      | 0.00  |
| 4           | 6  | 0.00  | 0.00      | 0.00  | 0.00  | 0.00      | 0.00  | 0.00  | 0.00      | 0.00  |
| 5           | 6  | 0.00  | 0.00      | 0.00  | 0.00  | 0.00      | 0.00  | 0.00  | 0.00      | 0.00  |
| 6           | 7  | 0.00  | 0.00      | 0.00  | 0.00  | 0.00      | 0.00  | 0.00  | 0.00      | 0.00  |
| 7           | 6  | 0.00  | 0.00      | 0.00  | 0.00  | 0.00      | 0.00  | 0.00  | 0.00      | 0.00  |
| 8           | 6  | 0.00  | 0.00      | 0.00  | 0.00  | 0.00      | 0.00  | 0.00  | 0.00      | 0.00  |
| 9           | 7  | 0.00  | 0.00      | 0.00  | 0.00  | 0.00      | 0.00  | 0.00  | 0.00      | 0.00  |
| 10          | 6  | 0.00  | 0.00      | 0.00  | 0.00  | 0.00      | 0.00  | 0.00  | 0.00      | 0.00  |
| 11          | 6  | 0.00  | 0.00      | 0.00  | 0.00  | 0.00      | 0.00  | 0.00  | 0.00      | 0.00  |
| 12          | 7  | 0.00  | 0.00      | 0.00  | 0.00  | 0.00      | 0.00  | 0.00  | 0.00      | 0.00  |
| 13          | 6  | 0.00  | 0.00      | 0.00  | 0.00  | 0.00      | 0.00  | 0.00  | 0.00      | 0.00  |
| 14          | 7  | 0.00  | 0.00      | 0.00  | 0.00  | 0.00      | 0.00  | 0.00  | 0.00      | 0.00  |
| 15          | 7  | -0.03 | -0.05     | 0.06  | 0.00  | 0.00      | 0.00  | 0.00  | 0.00      | 0.00  |
| 16          | 6  | 0.00  | 0.00      | 0.00  | 0.00  | 0.00      | 0.00  | 0.00  | 0.00      | 0.00  |
| 17          | 16 | 0.00  | 0.00      | 0.00  | 0.00  | 0.00      | 0.00  | 0.00  | 0.00      | 0.00  |
| 18          | 6  | 0.00  | 0.00      | 0.00  | 0.00  | 0.00      | 0.00  | 0.00  | 0.00      | 0.00  |
| 19          | 8  | 0.00  | 0.00      | 0.00  | -0.04 | -0.04     | -0.03 | 0.01  | 0.01      | 0.00  |
| 20          | 8  | 0.00  | 0.00      | 0.00  | -0.01 | 0.00      | -0.01 | -0.04 | 0.02      | -0.04 |
| 21          | 1  | 0.00  | 0.00      | 0.00  | 0.00  | 0.00      | 0.00  | 0.00  | 0.00      | 0.00  |
| 22          | 1  | 0.00  | 0.00      | 0.00  | 0.00  | 0.00      | 0.00  | 0.00  | 0.00      | 0.00  |
| 23          | 1  | 0.00  | 0.00      | 0.00  | 0.00  | 0.00      | 0.00  | 0.00  | 0.00      | 0.00  |
| 24          | 1  | 0.00  | 0.00      | 0.00  | 0.00  | 0.00      | 0.00  | 0.00  | 0.00      | 0.00  |
| 25          | 1  | 0.00  | 0.00      | 0.00  | 0.00  | 0.00      | 0.00  | 0.00  | 0.00      | 0.00  |
| 26          | 1  | 0.00  | 0.00      | 0.00  | 0.00  | 0.00      | 0.00  | 0.00  | 0.00      | 0.00  |
| 27          | 1  | 0.00  | 0.00      | 0.00  | 0.09  | -0.04     | 0.09  | 0.68  | -0.29     | 0.66  |
| 28          | 1  | 0.00  | 0.00      | 0.00  | 0.00  | 0.00      | 0.00  | 0.00  | 0.00      | 0.00  |
| 29          | 1  | 0.00  | 0.00      | 0.00  | 0.00  | 0.00      | 0.00  | 0.00  | 0.00      | 0.00  |
| 30          | 1  | 0.00  | 0.00      | 0.00  | 0.00  | 0.00      | 0.00  | 0.00  | 0.00      | 0.00  |
| 31          | 1  | 0.00  | 0.00      | 0.00  | 0.00  | 0.00      | 0.00  | 0.00  | 0.00      | 0.00  |
| 32          | 1  | 0.00  | 0.00      | 0.00  | 0.00  | 0.00      | 0.00  | 0.00  | 0.00      | 0.00  |
| 33          | 1  | 0.00  | 0.00      | 0.00  | 0.61  | 0.60      | 0.49  | -0.09 | -0.08     | -0.07 |
| 34          | 1  | -0.11 | 0.36      | -0.62 | 0.00  | 0.00      | 0.00  | 0.00  | 0.00      | 0.00  |
| 35          | 1  | 0.58  | 0.26      | -0.26 | 0.00  | 0.00      | 0.00  | 0.00  | 0.00      | 0.00  |
| 36          | 1  | 0.01  | -0.01     | 0.01  | 0.00  | 0.00      | 0.00  | 0.00  | 0.00      | 0.00  |
